# Supplementary material
Source: publisher figshare collection journal article supplement (https://frontiersin.figshare.com/ndownloader/files/14332325)

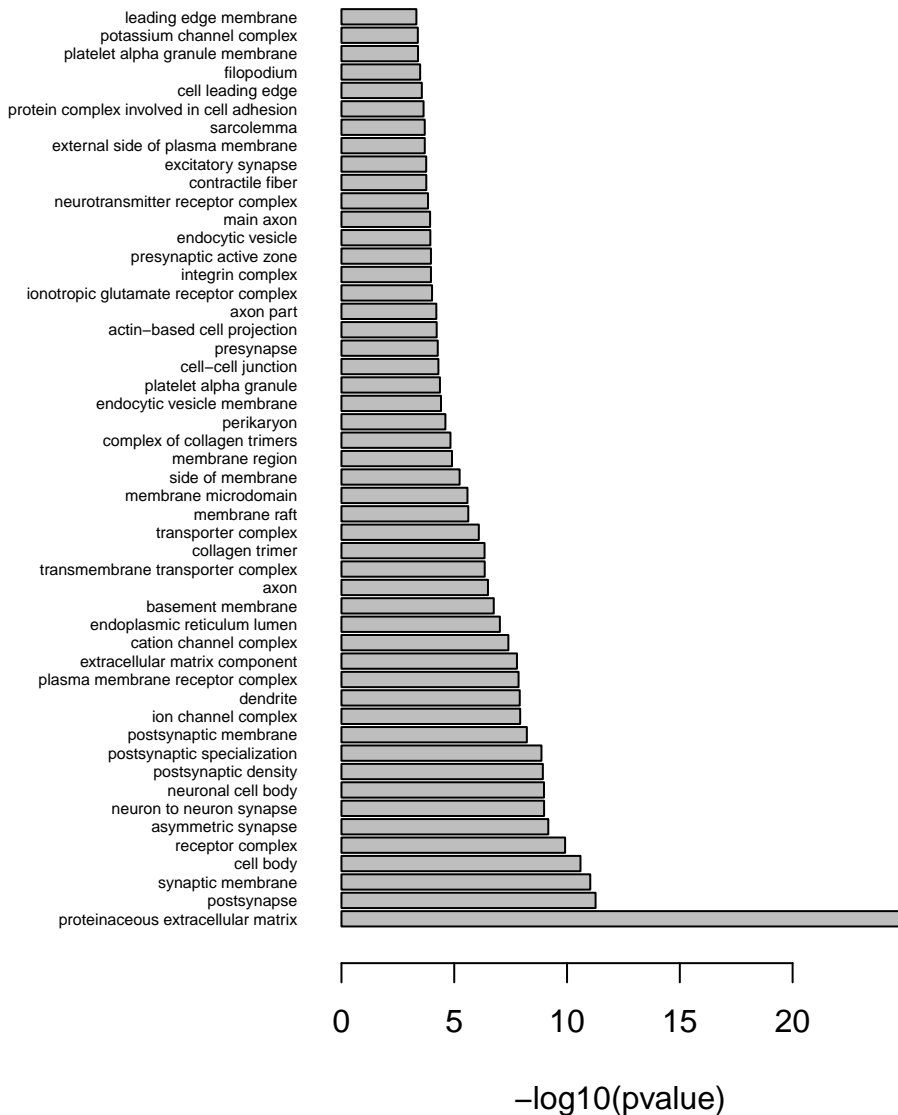

Supplement: Supplementary file 1 [file 14332325]

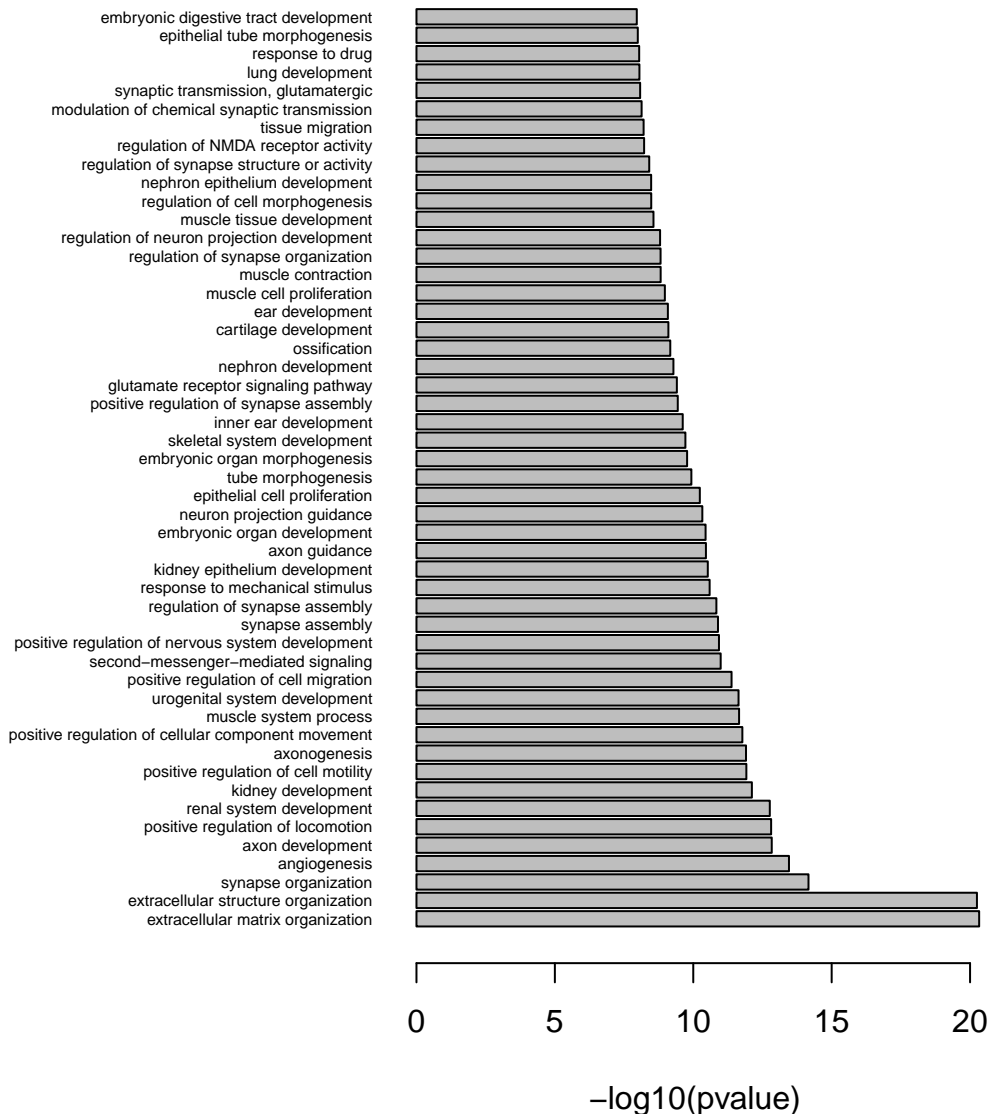

Supplement: Supplementary file 2 [file 14332325]

topGO\_BP\_elimfisher\_pieChart

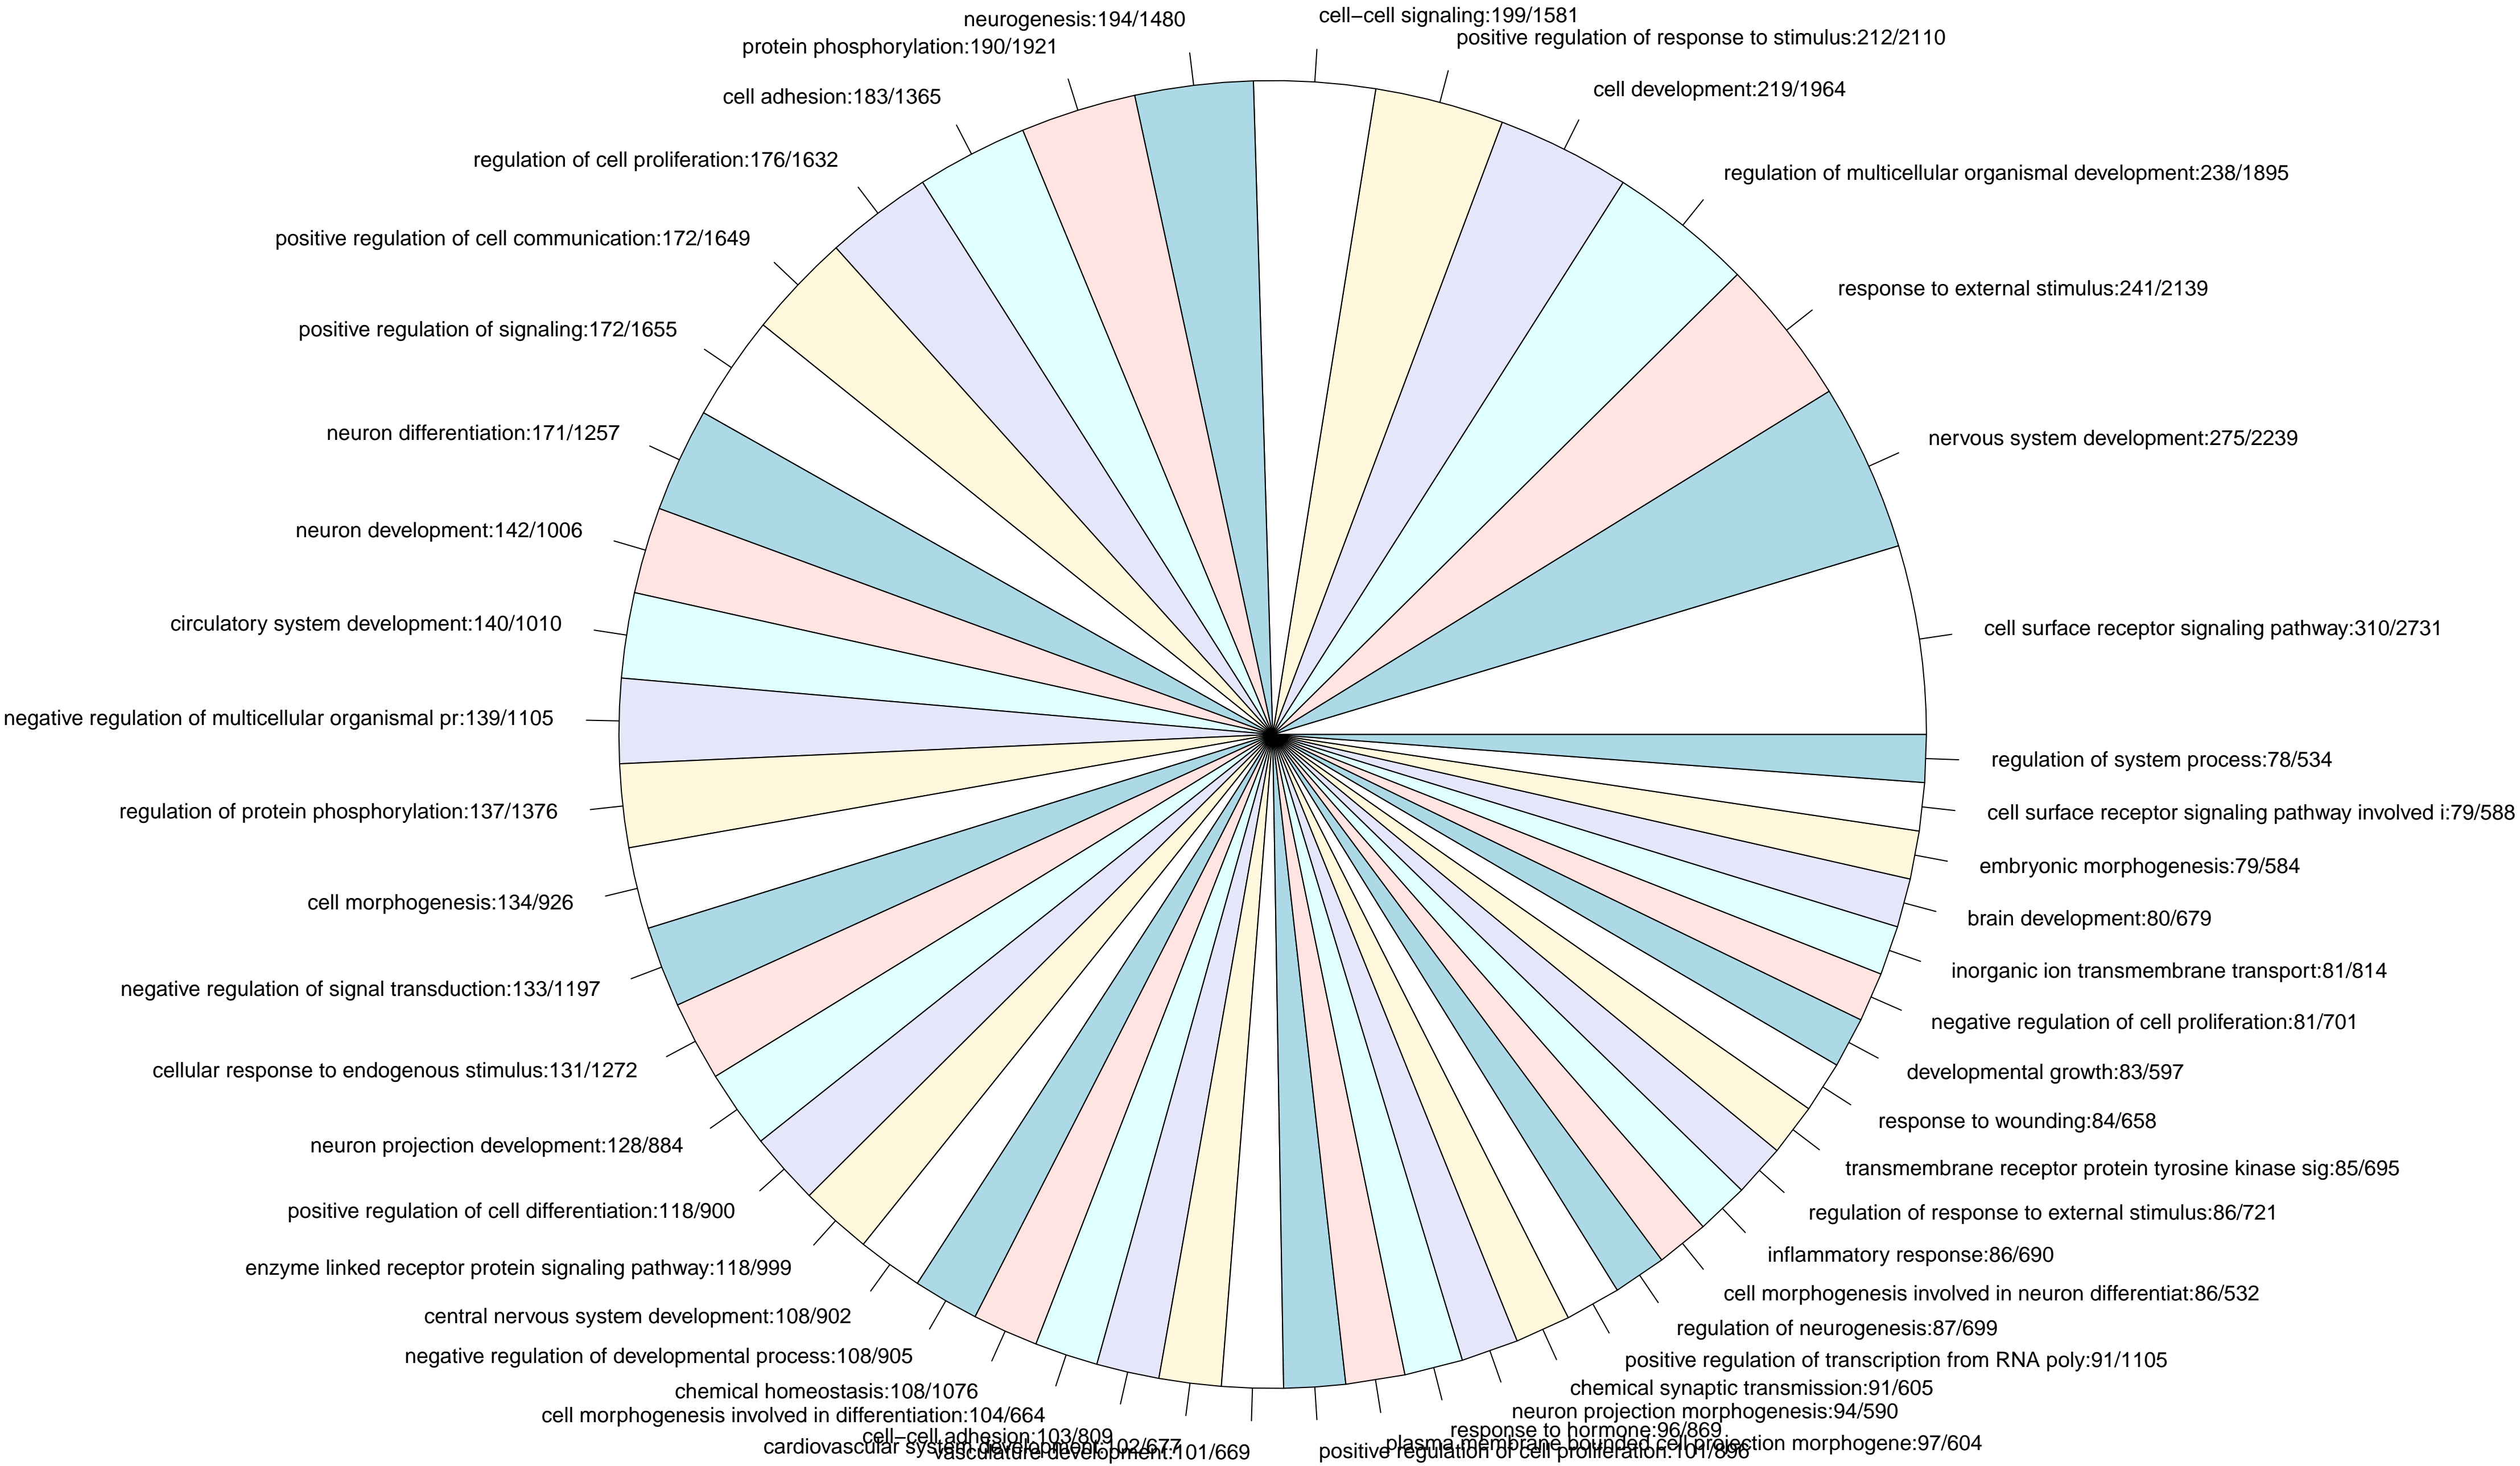

Supplement: Supplementary file 3 [file 14332325]

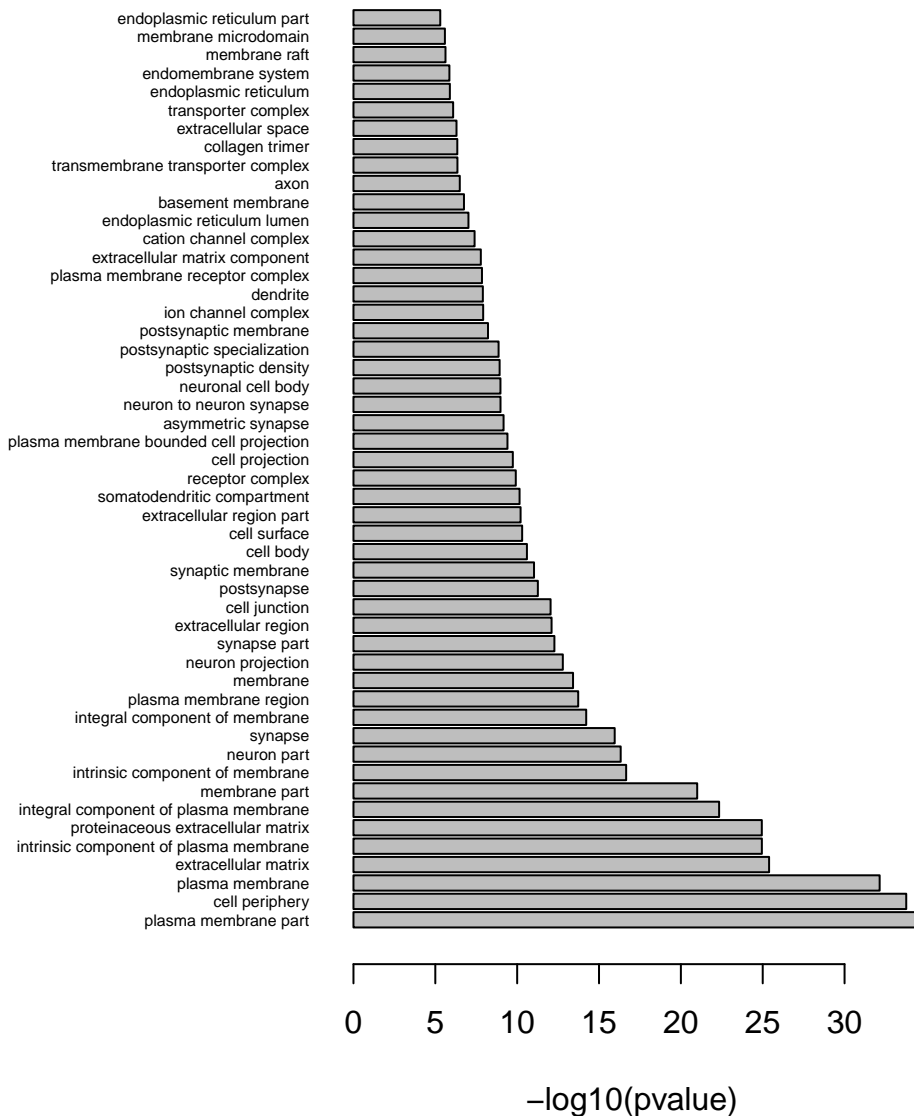

Supplement: Supplementary file 4 [file 14332325]

topGO\_MF\_classicfisher\_pieChart

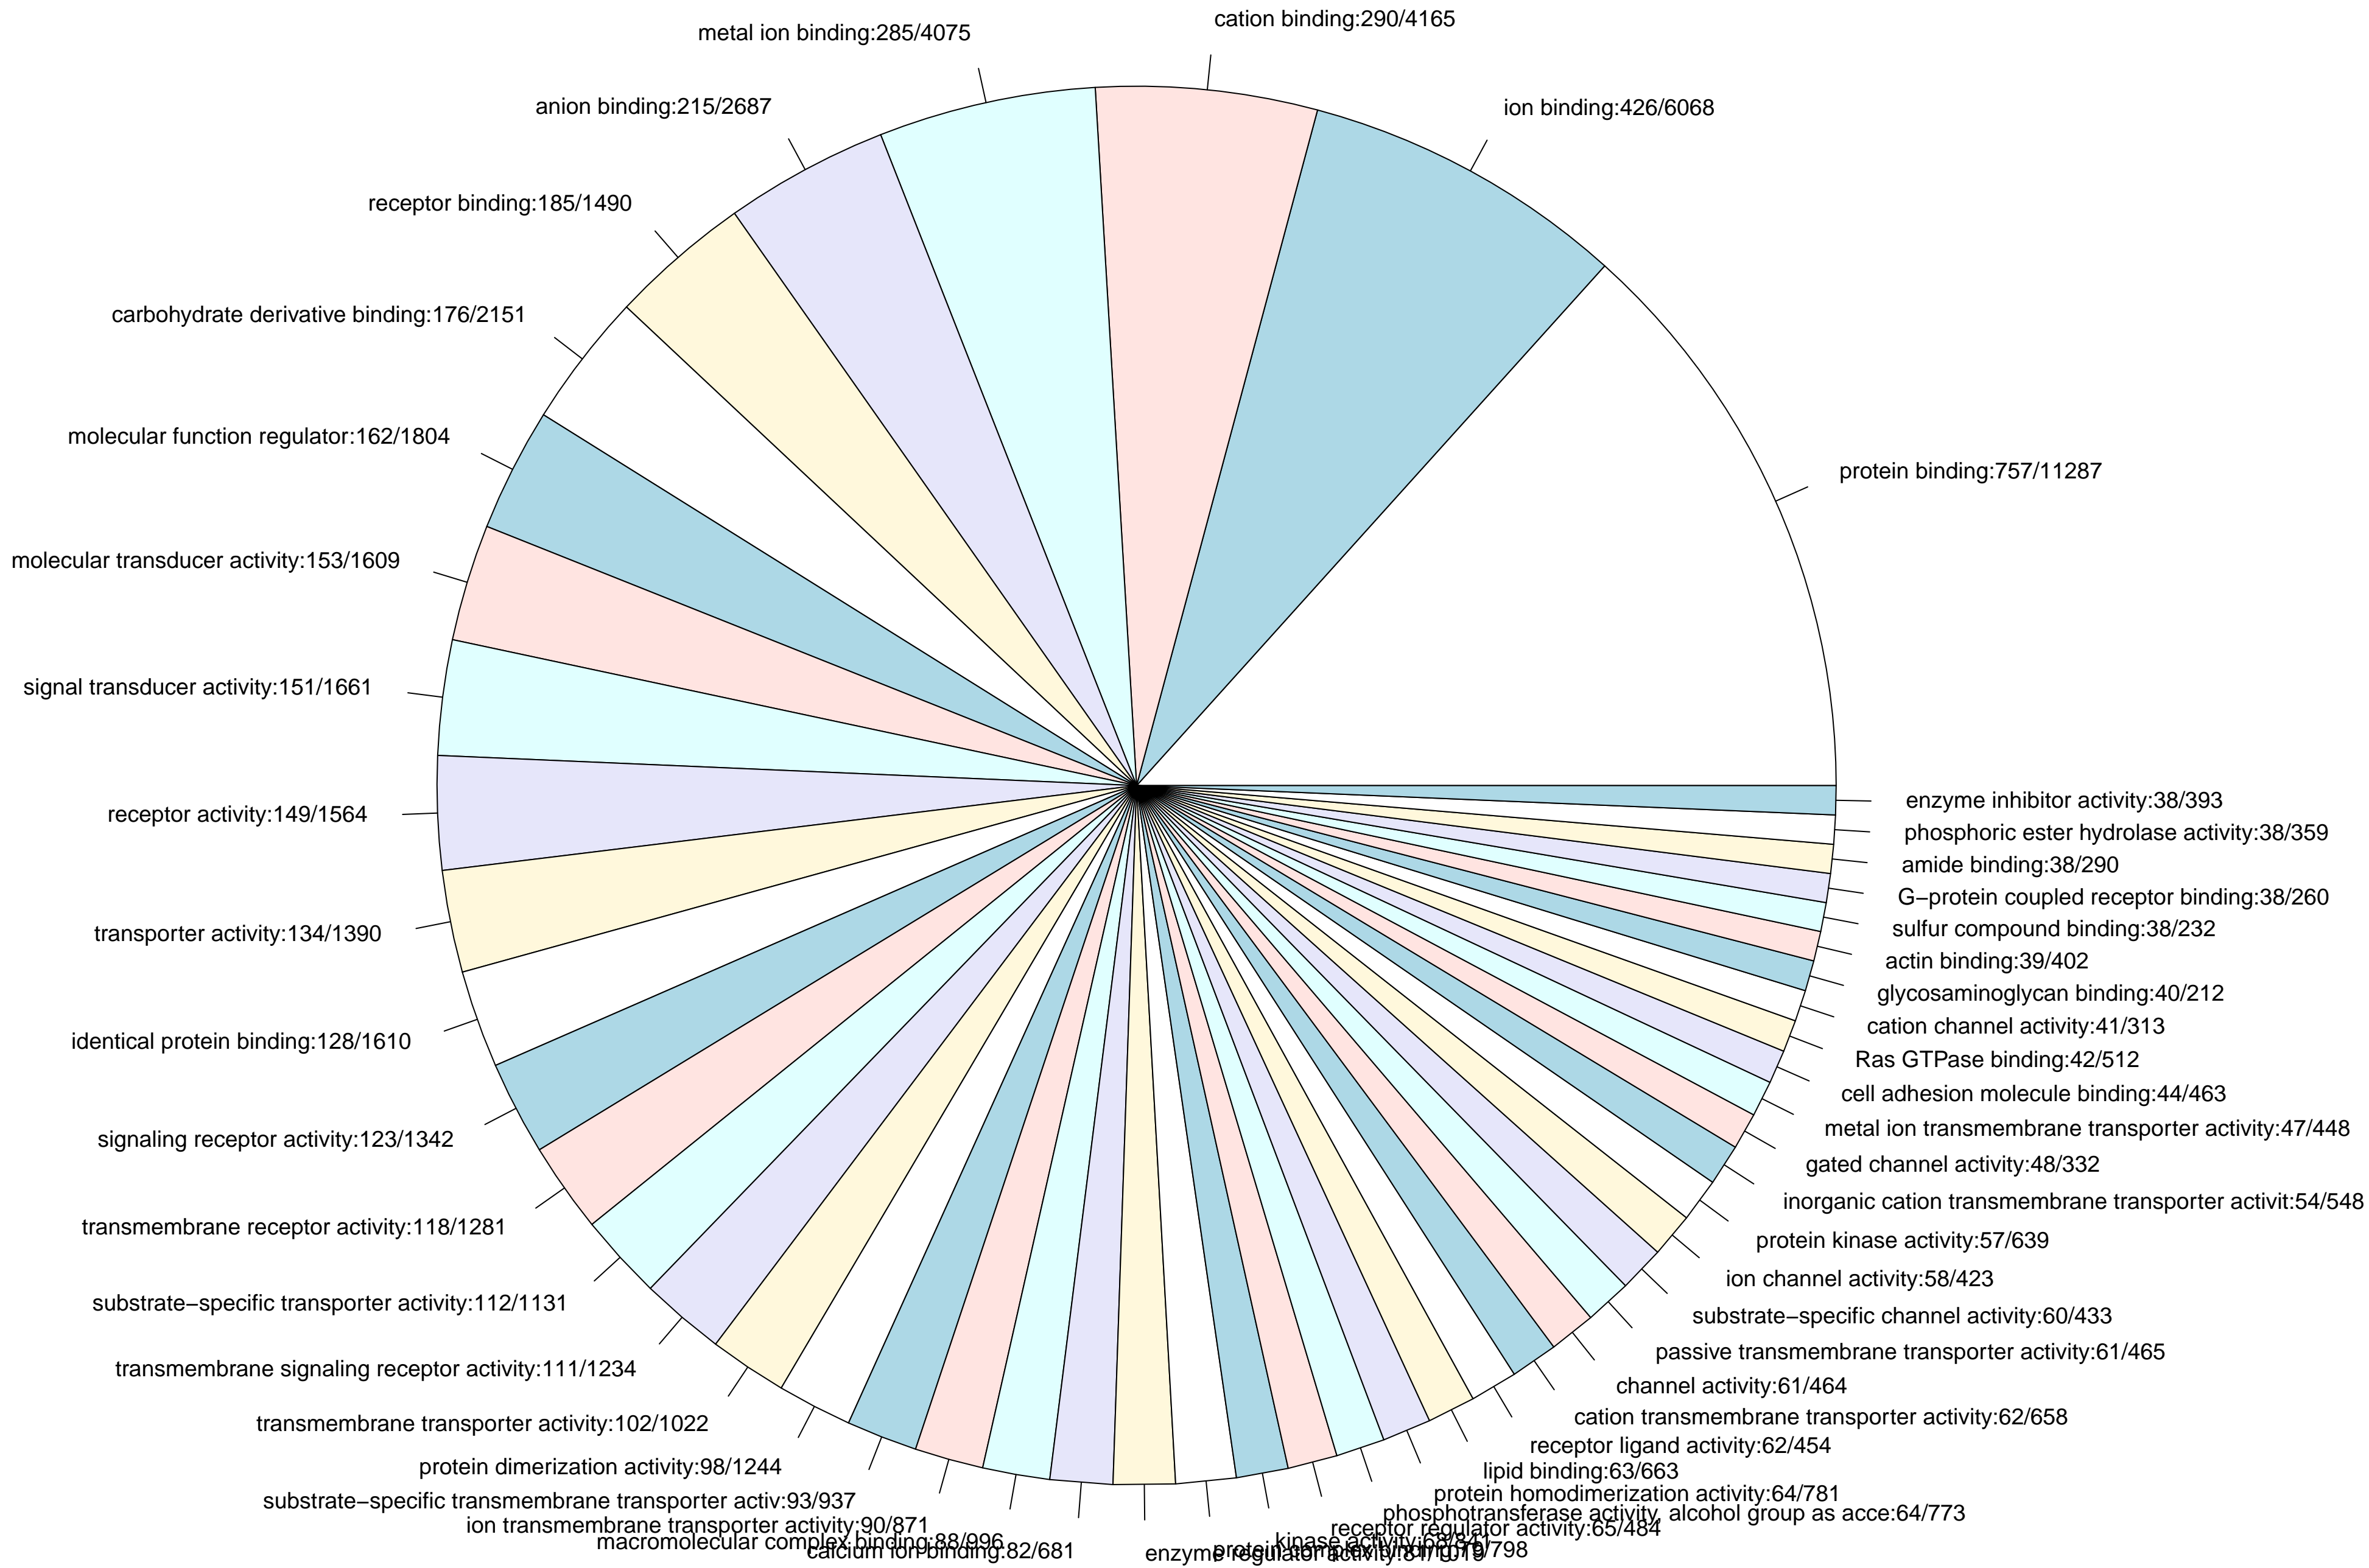

Supplement: Supplementary file 5 [file 14332325]

topGO\_CC\_classicfisher\_pieChart

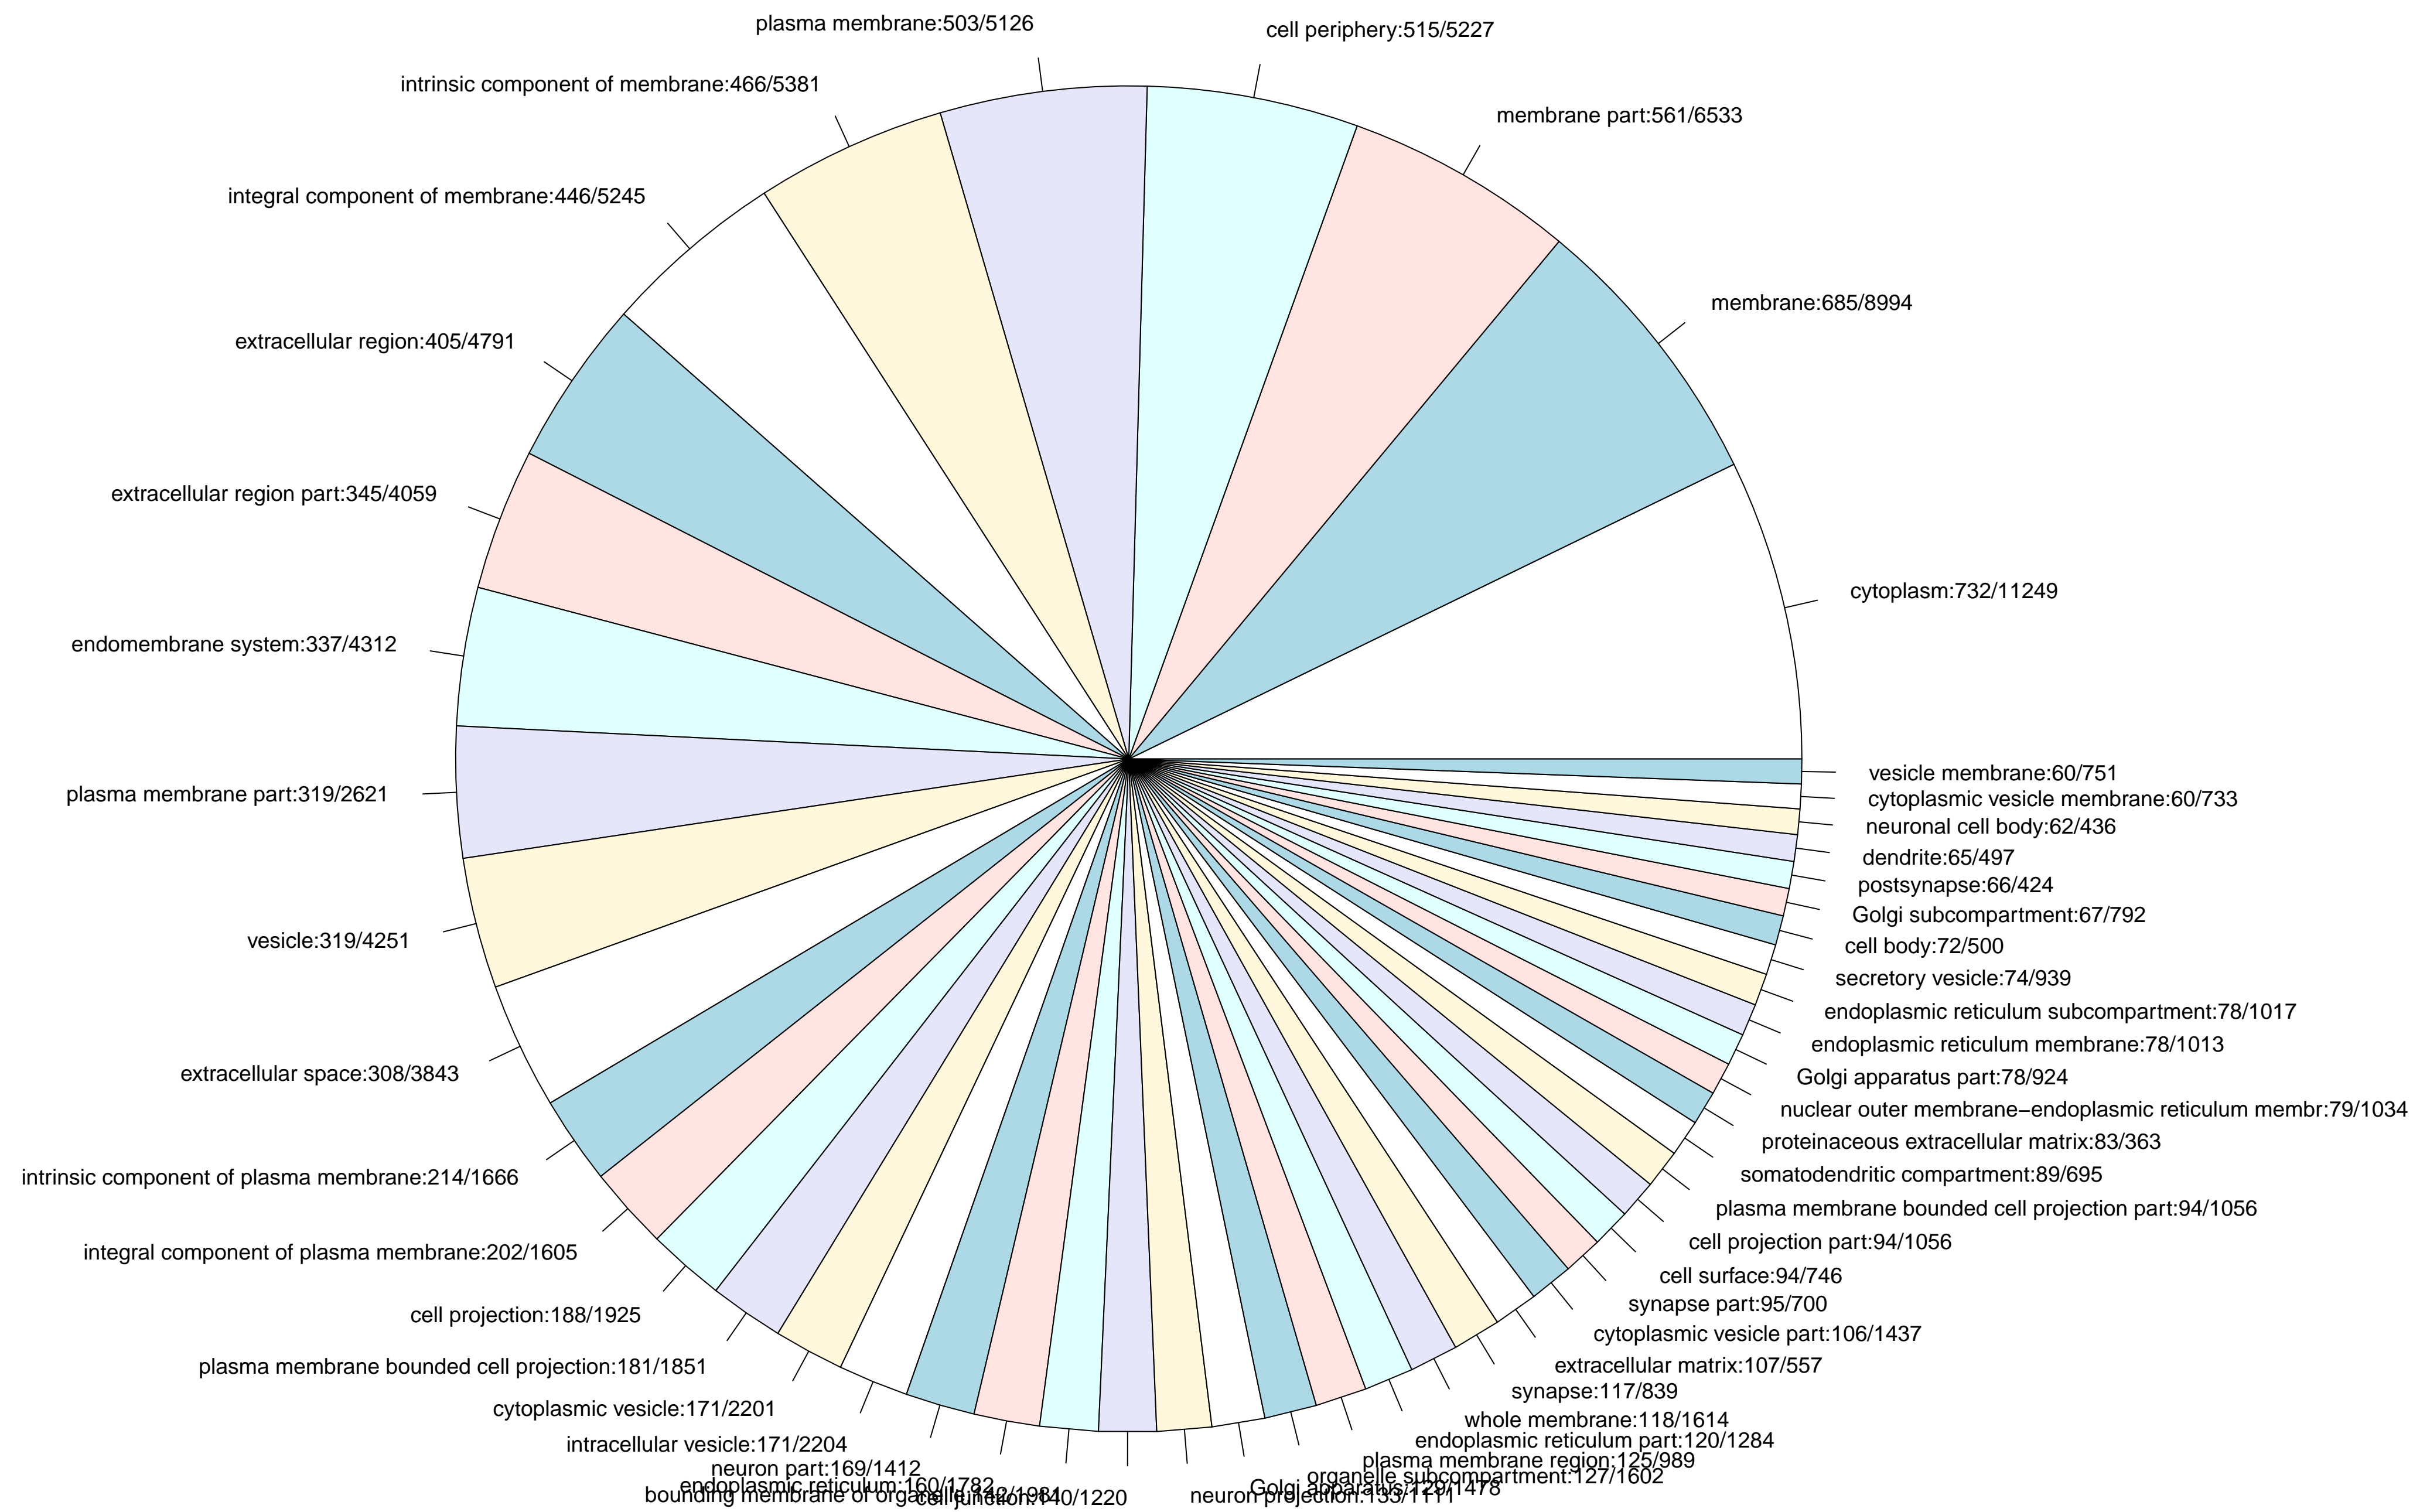

Supplement: Supplementary file 6 [file 14332325]

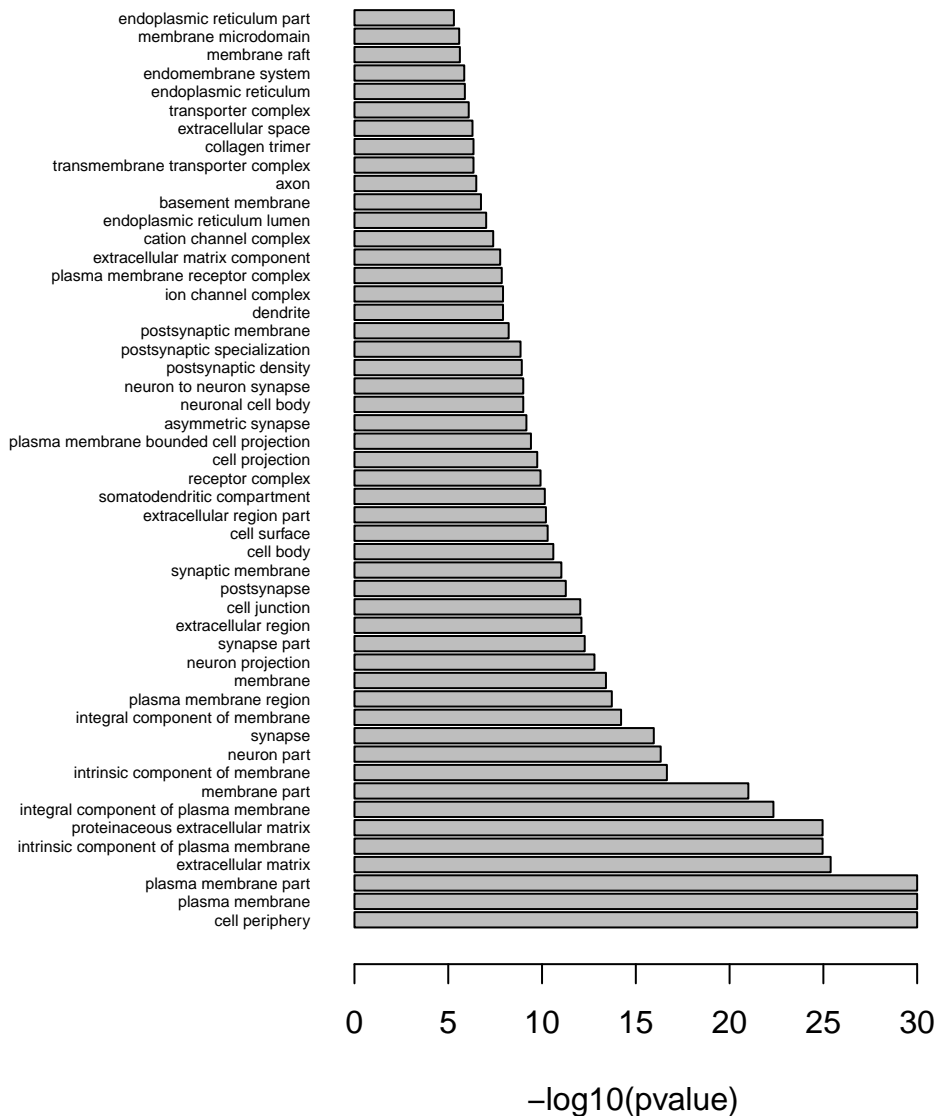

Supplement: Supplementary file 7 [file 14332325]

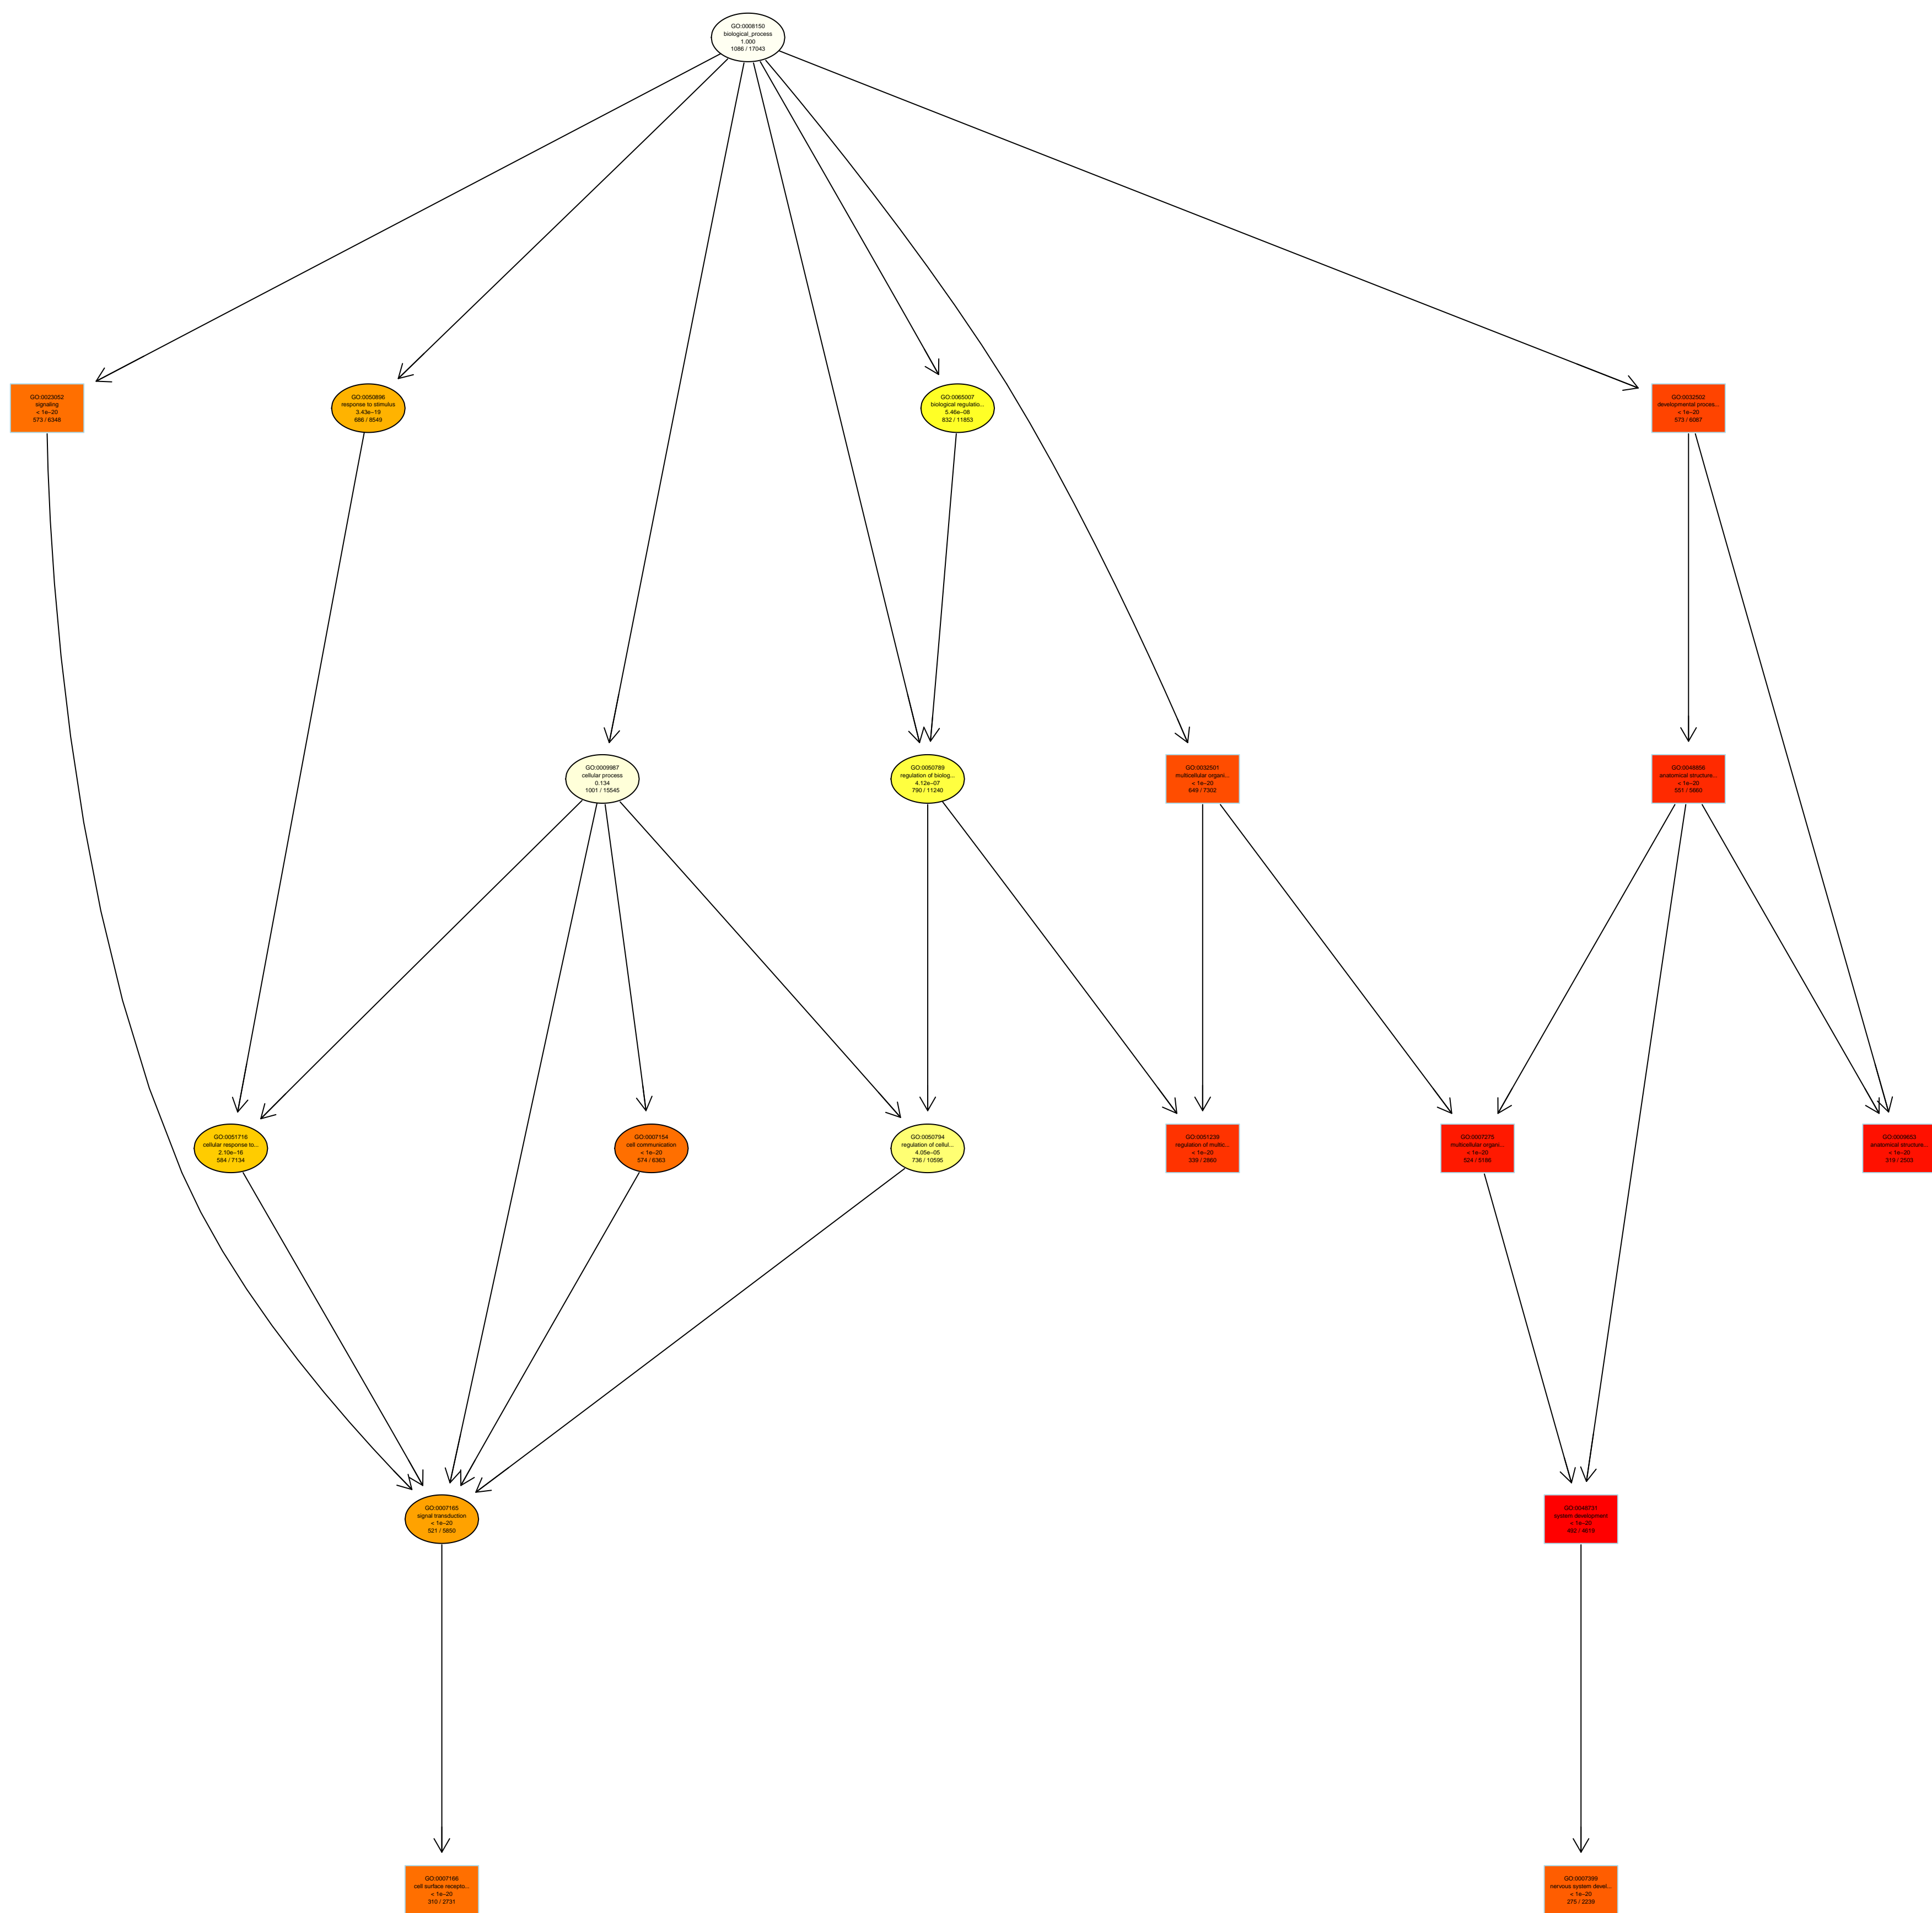

Supplement: Supplementary file 8 [file 14332325]

### GOstats\_MF\_Up\_pieChart

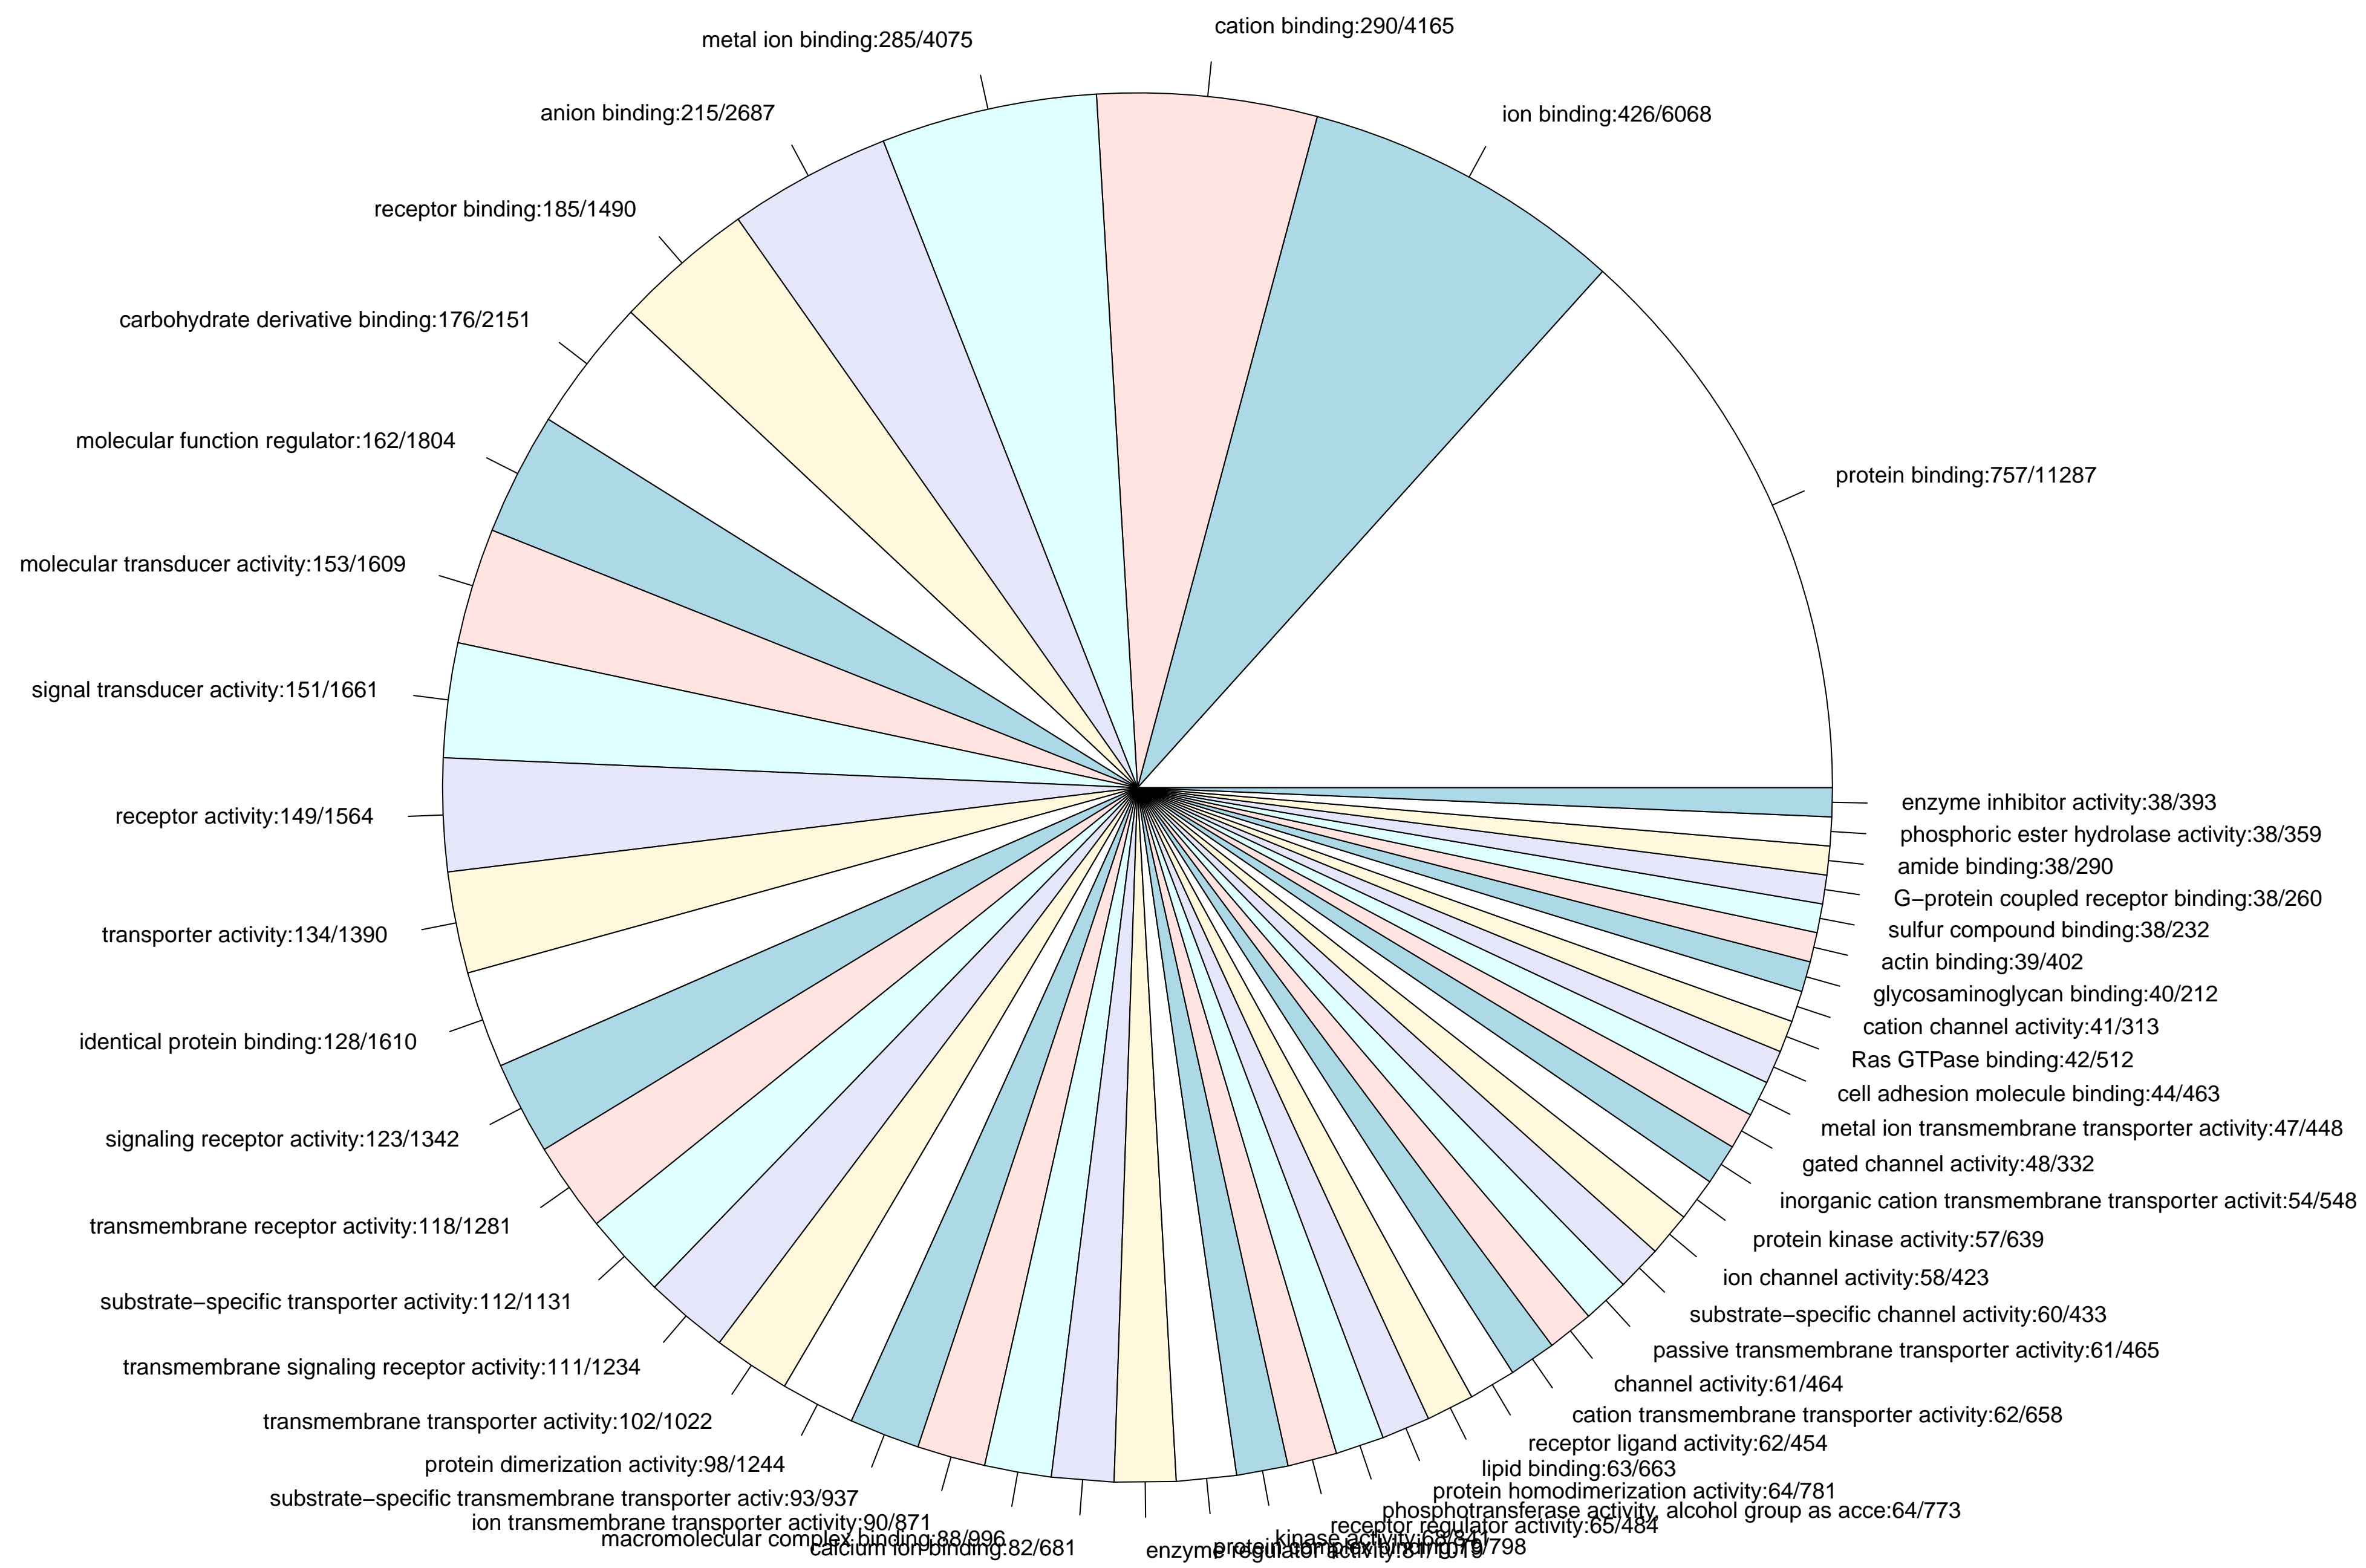

Supplement: Supplementary file 9 [file 14332325]

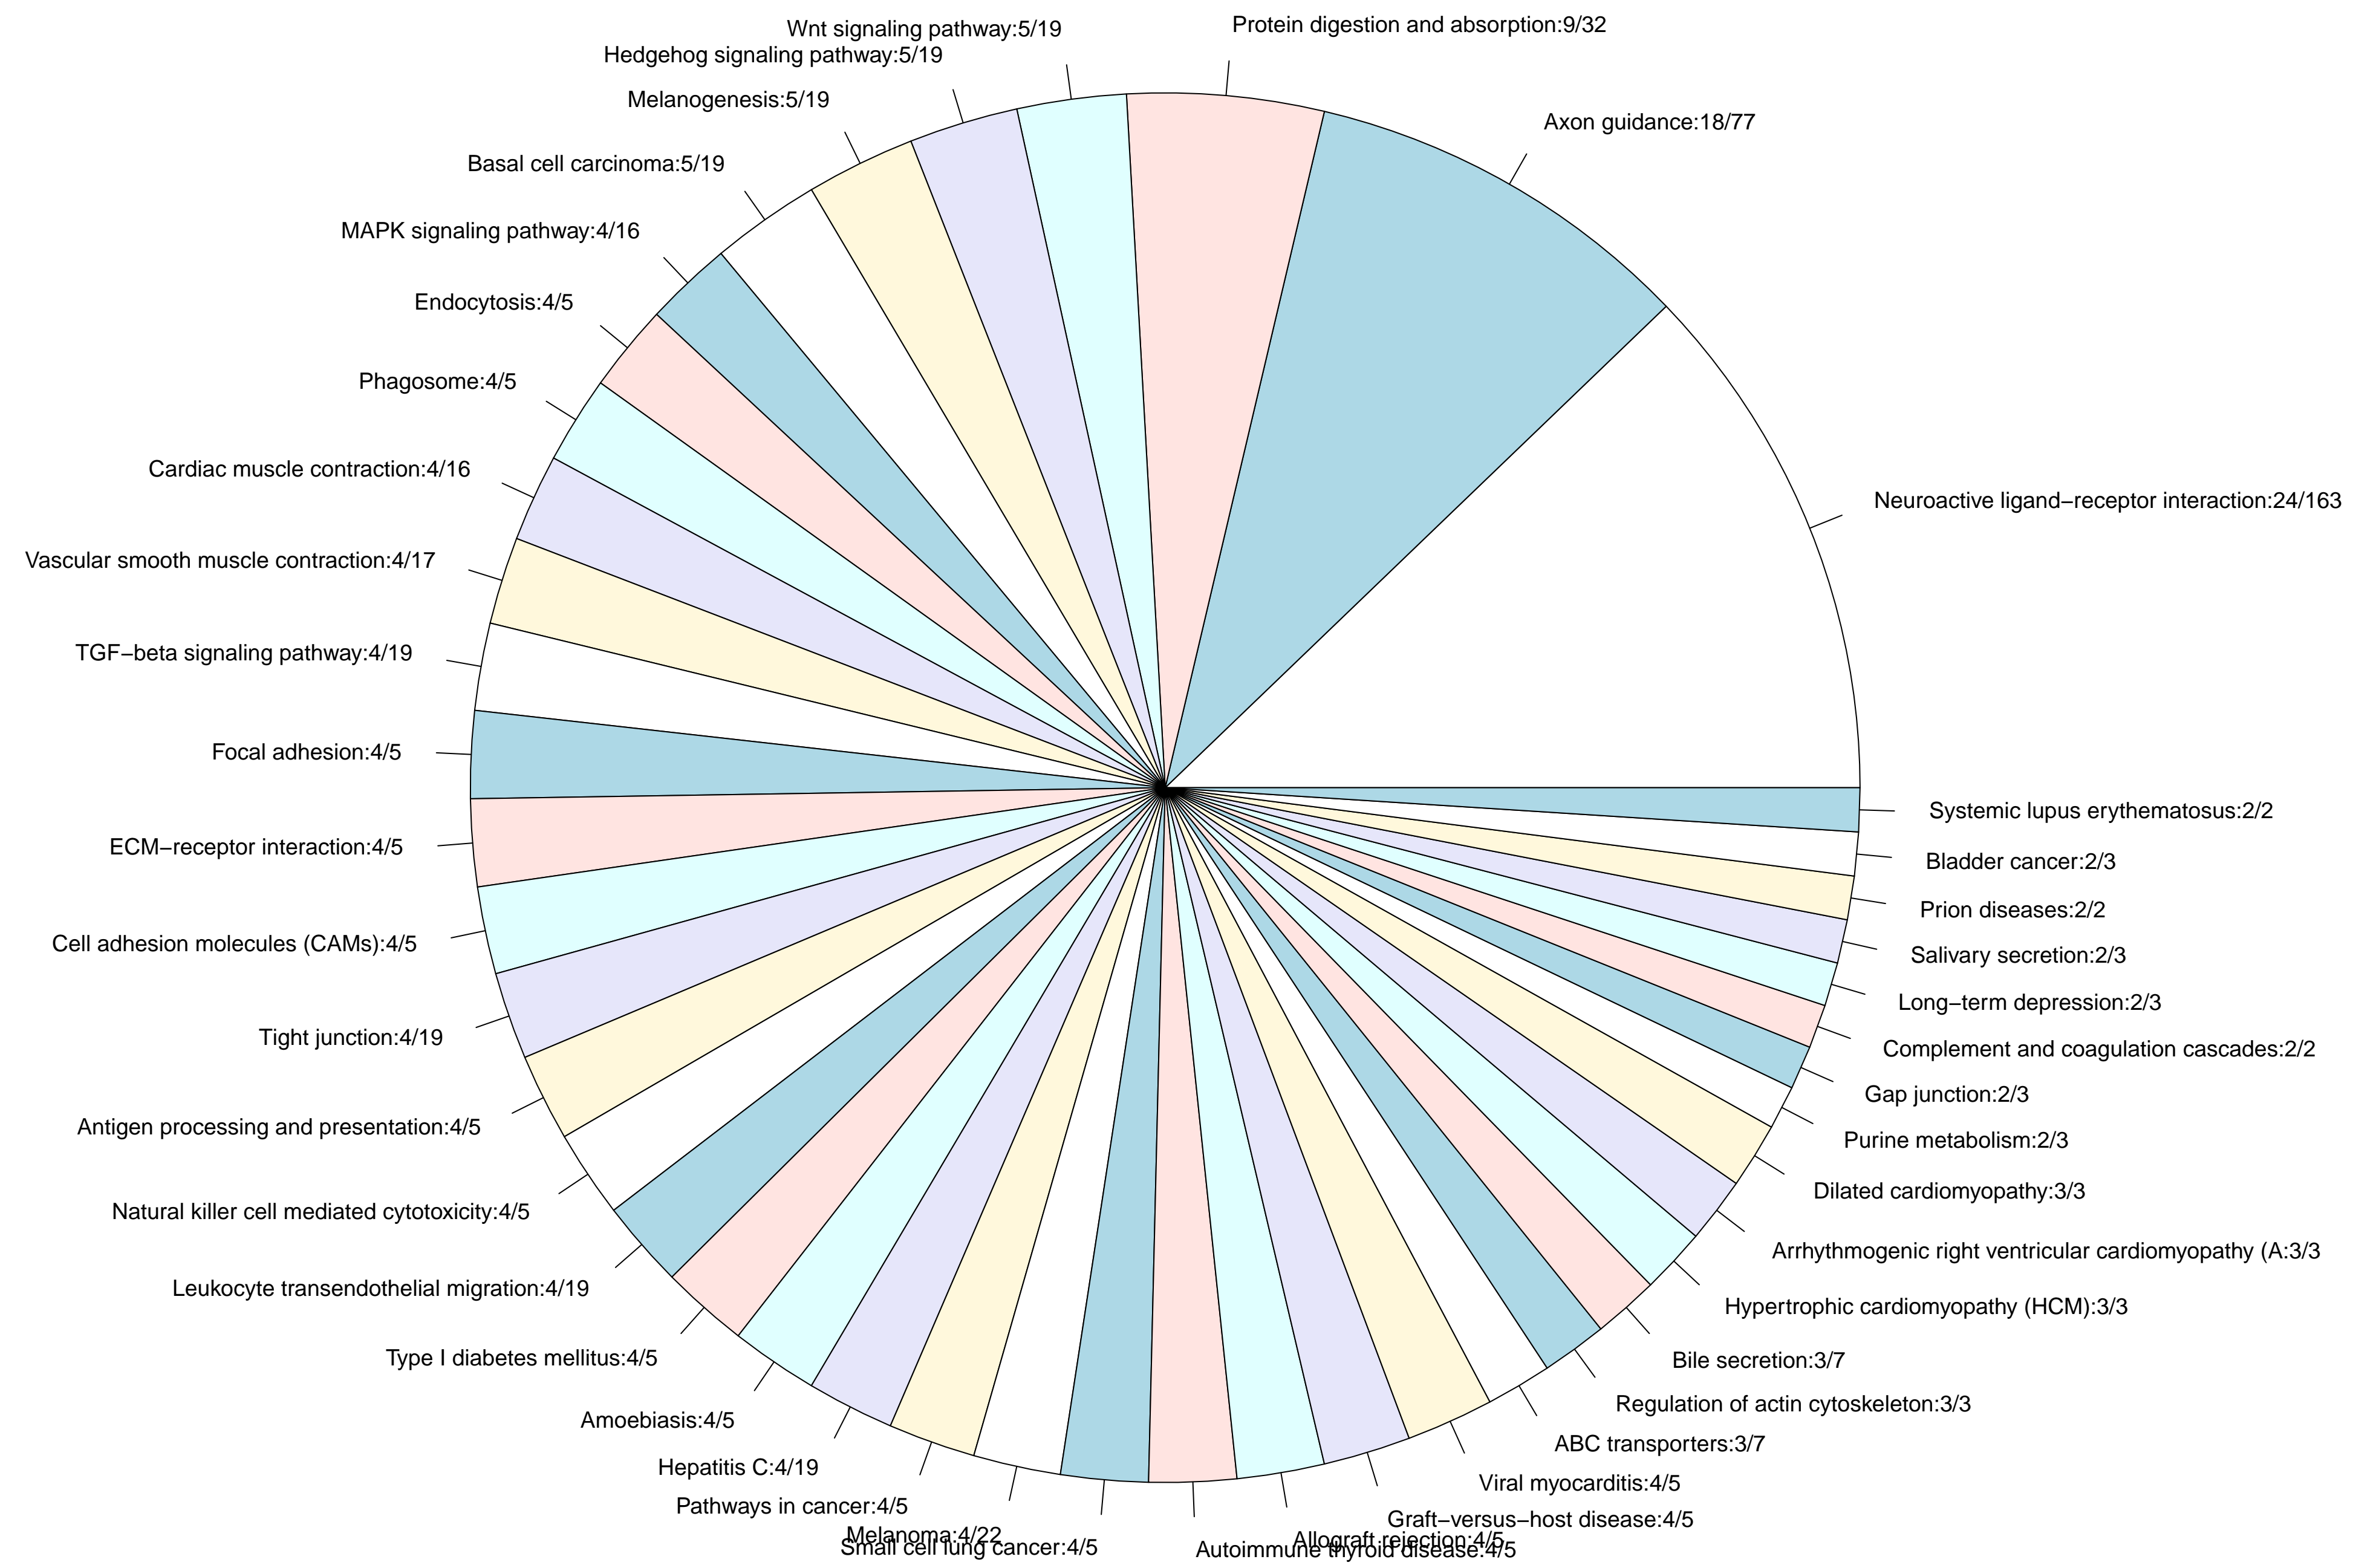

Supplement: Supplementary file 10 [file 14332325]

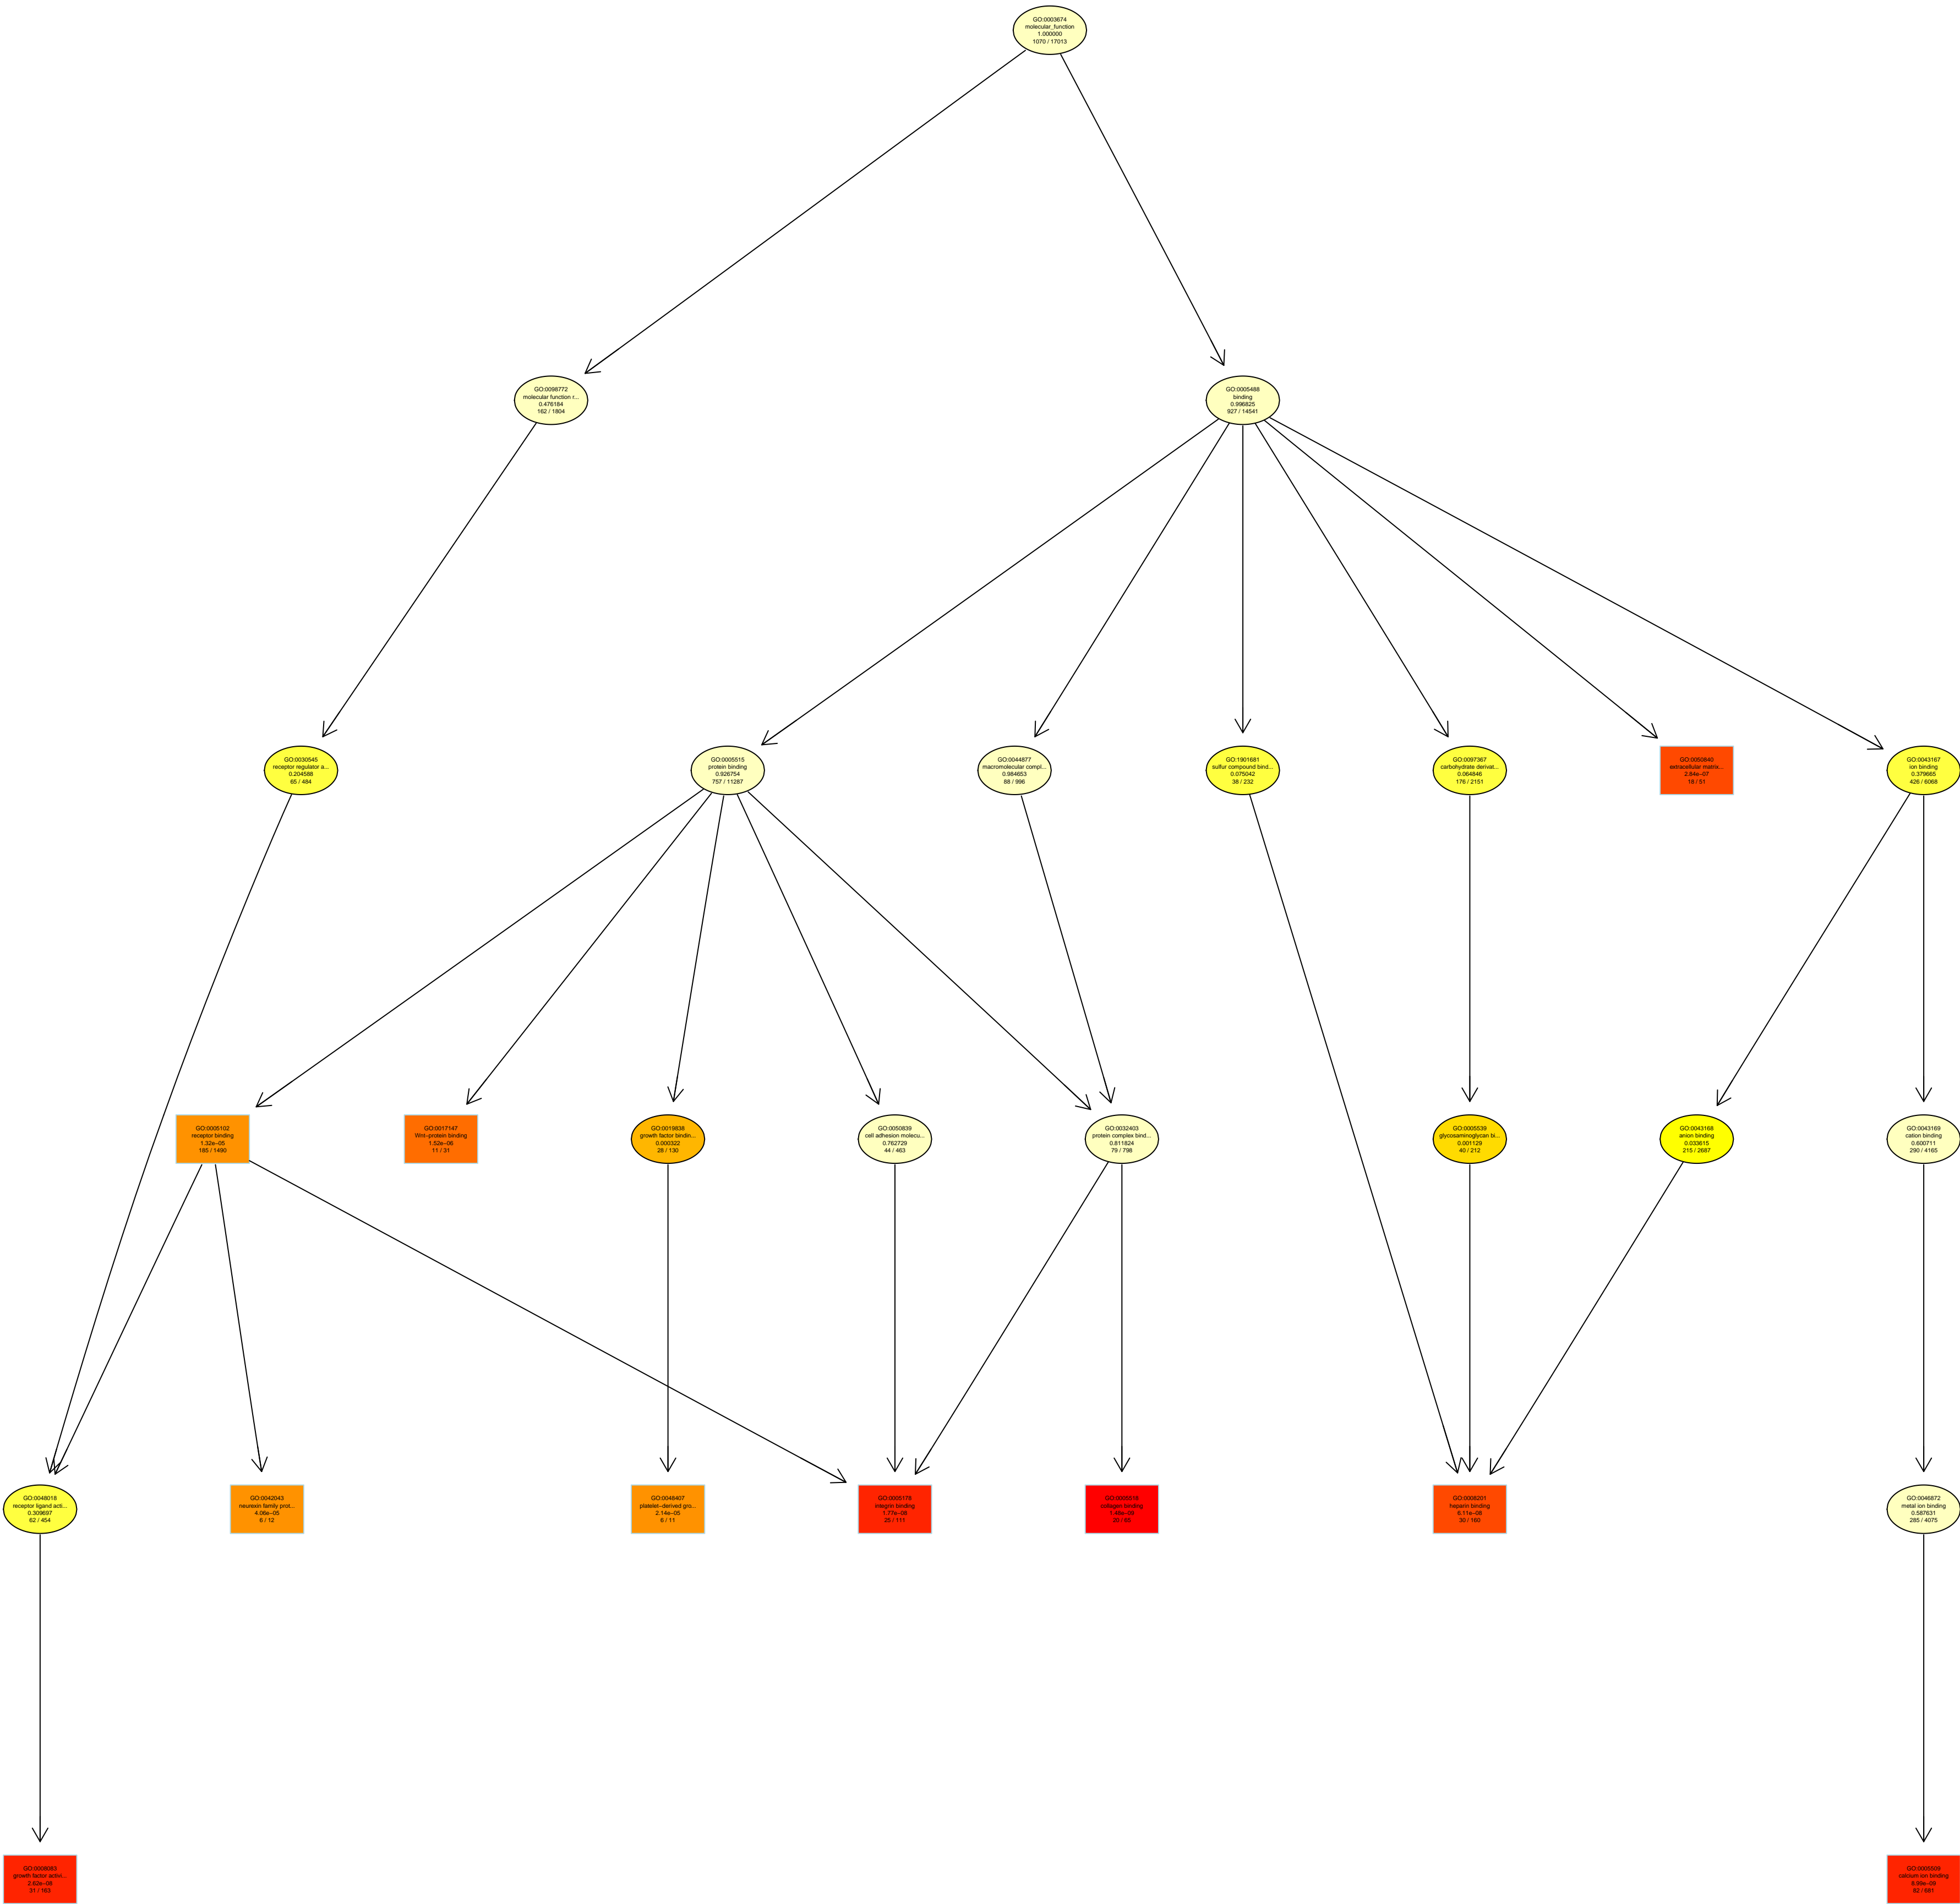

Supplement: Supplementary file 11 [file 14332325]

### GOstats\_BP\_Down\_pieChart

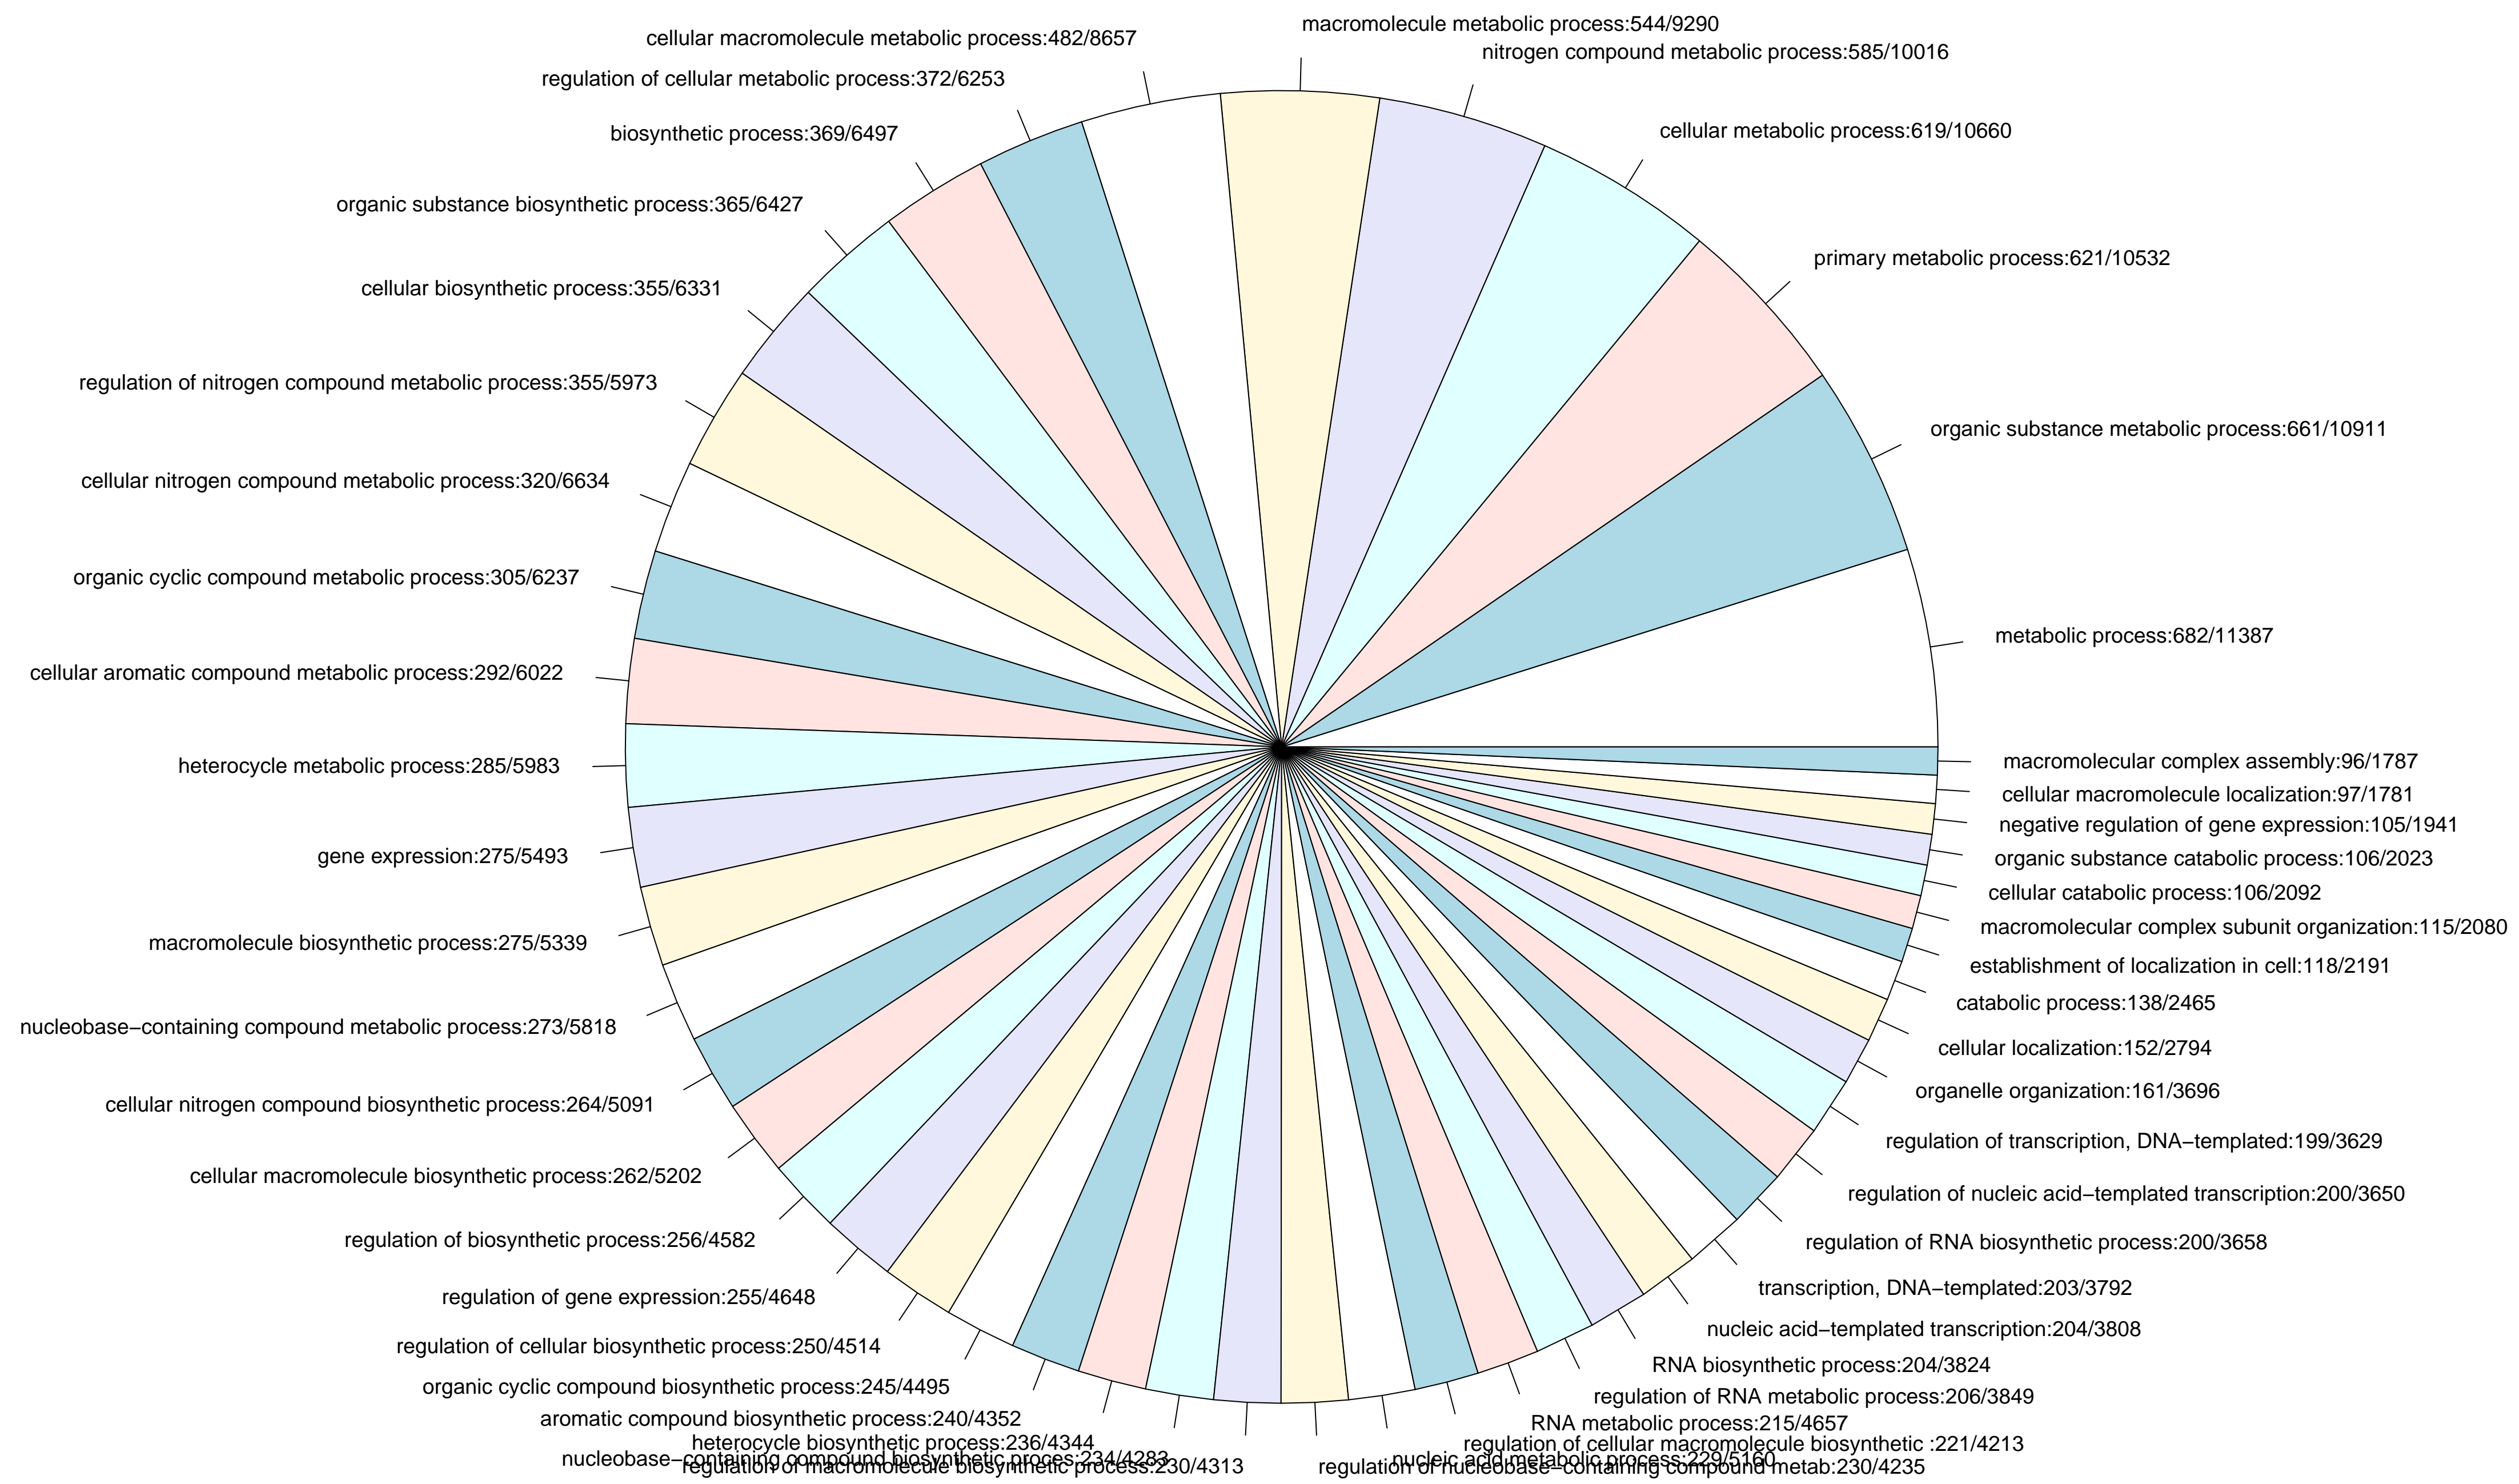

Supplement: Supplementary file 12 [file 14332325]

### GOstats\_MF\_Down\_pieChart

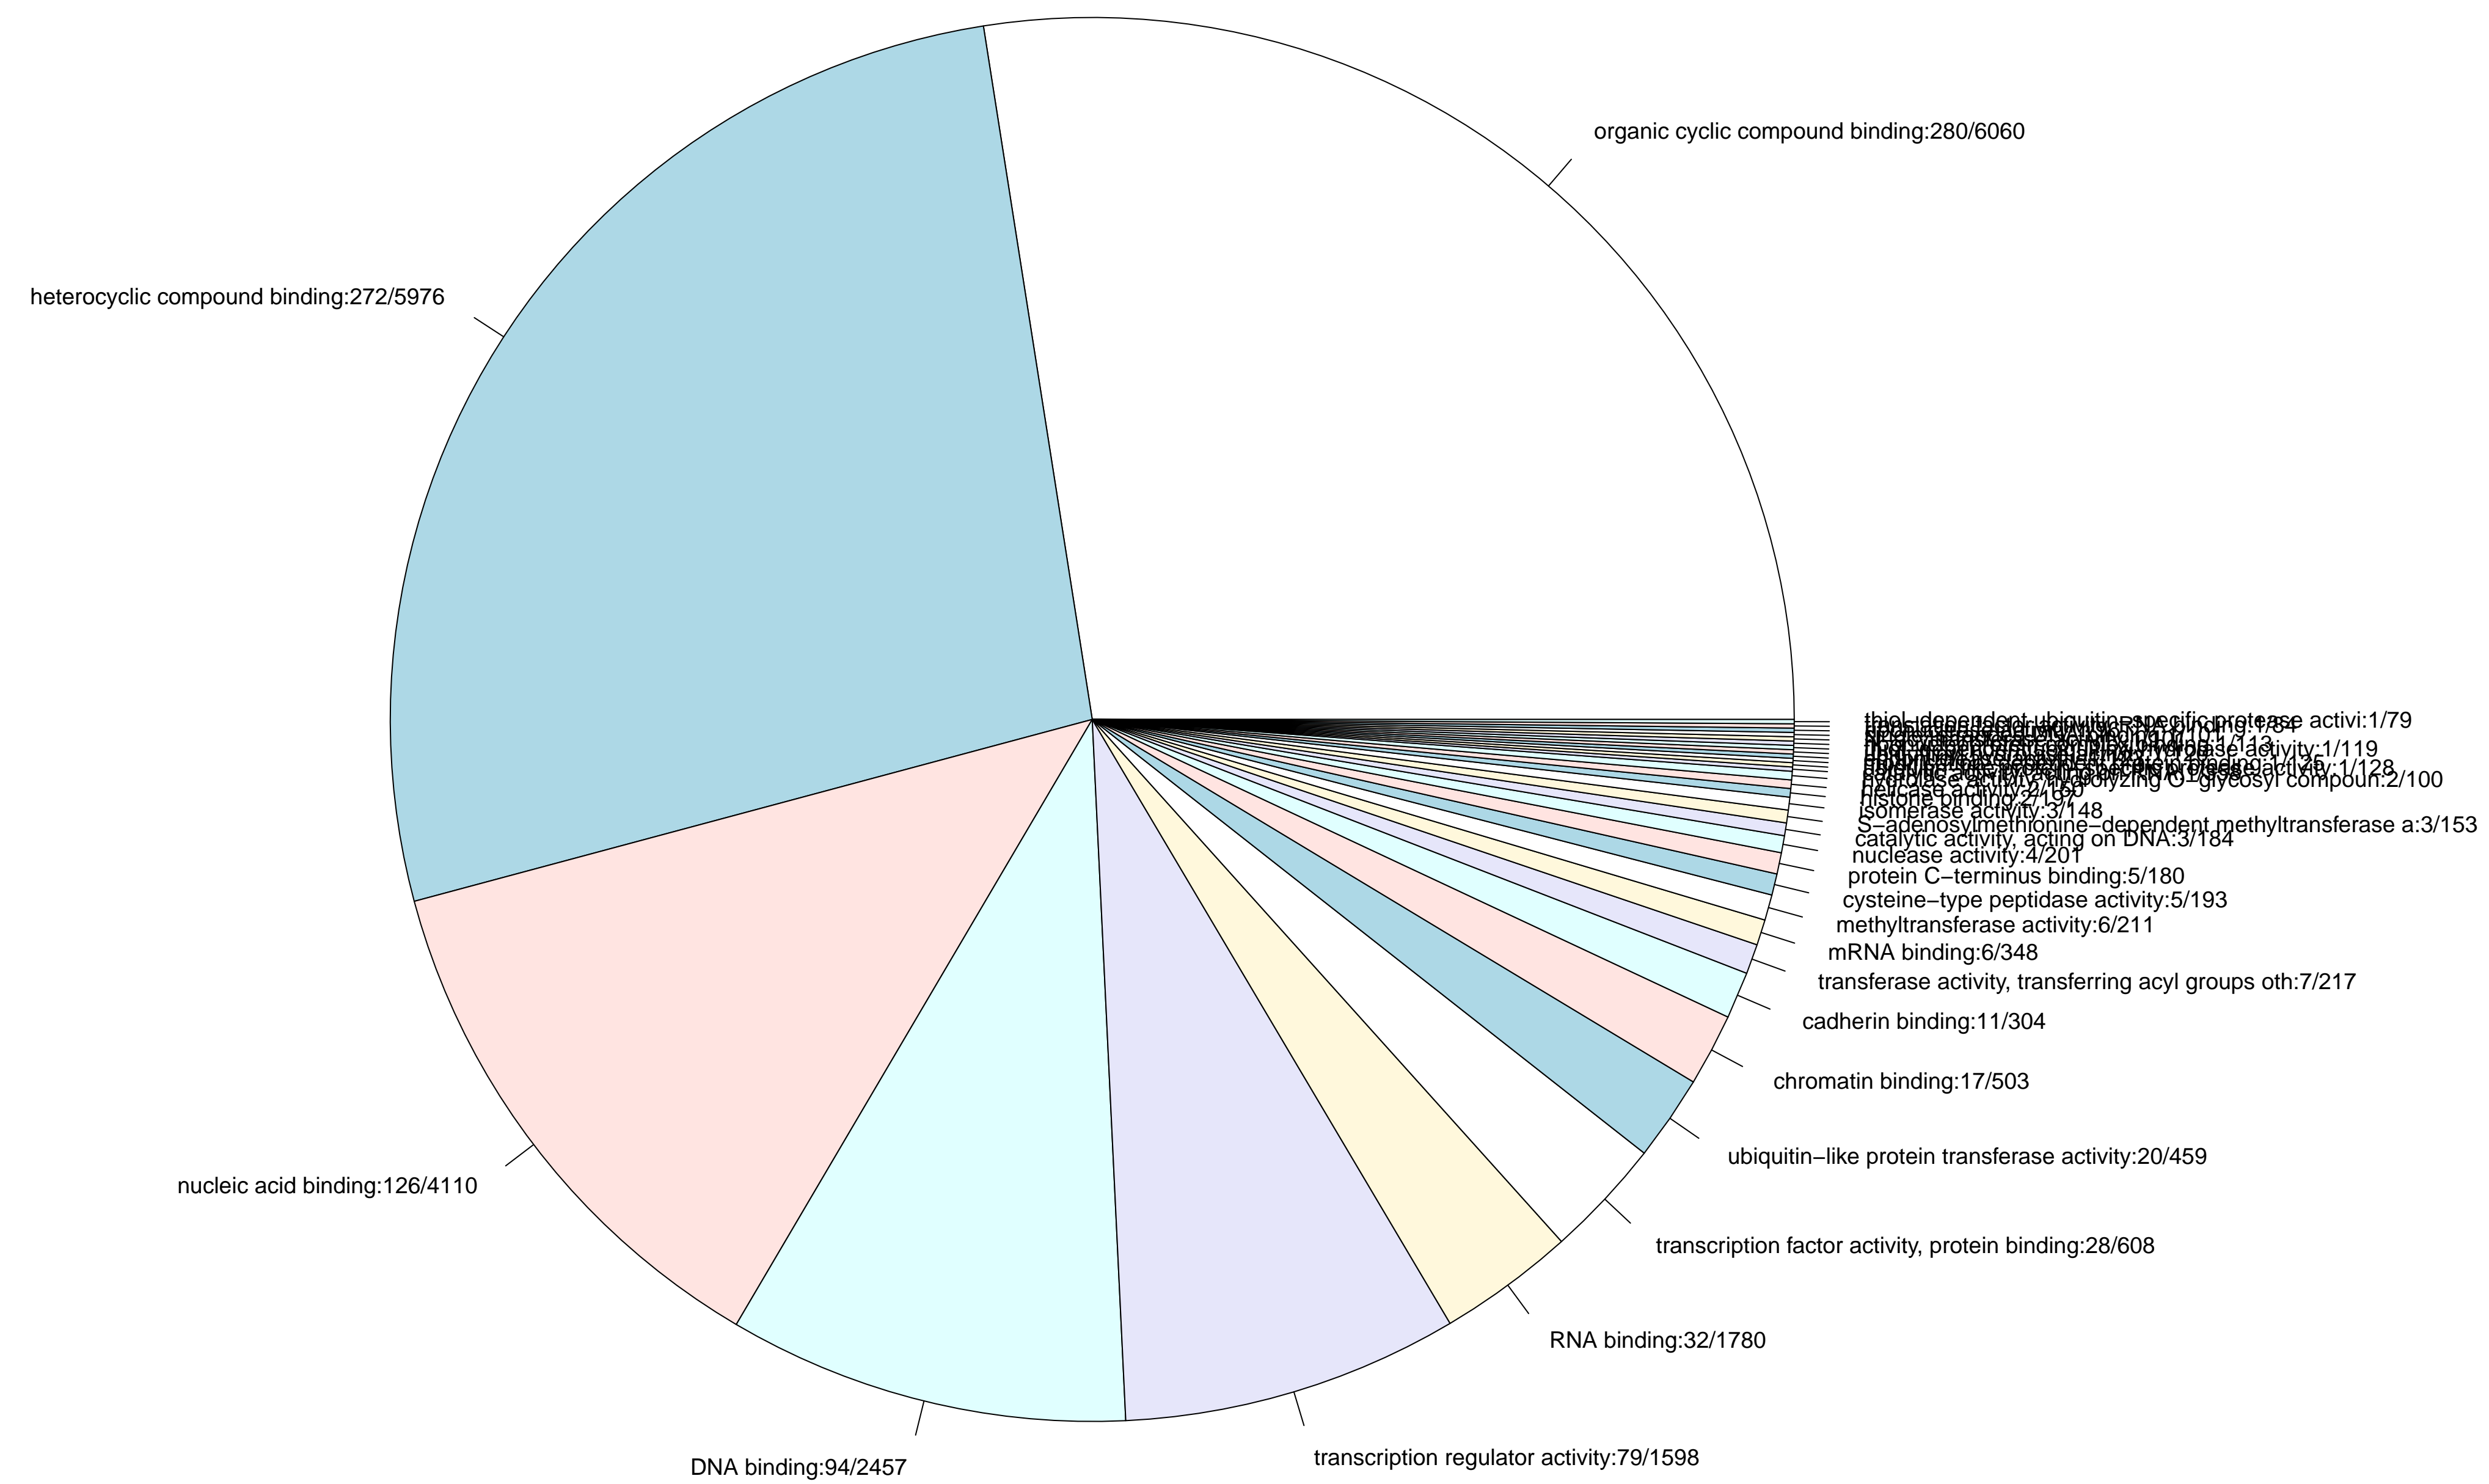

Supplement: Supplementary file 13 [file 14332325]

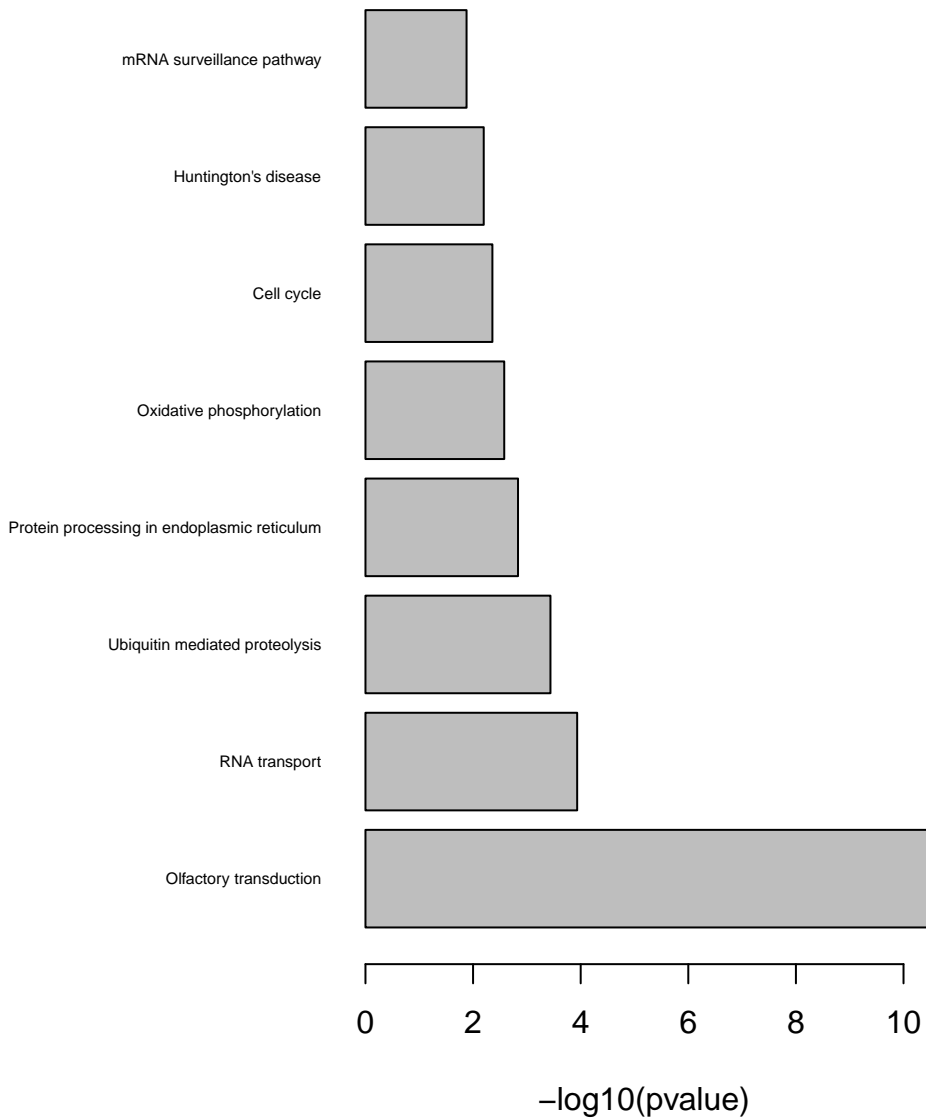

Supplement: Supplementary file 14 [file 14332325]

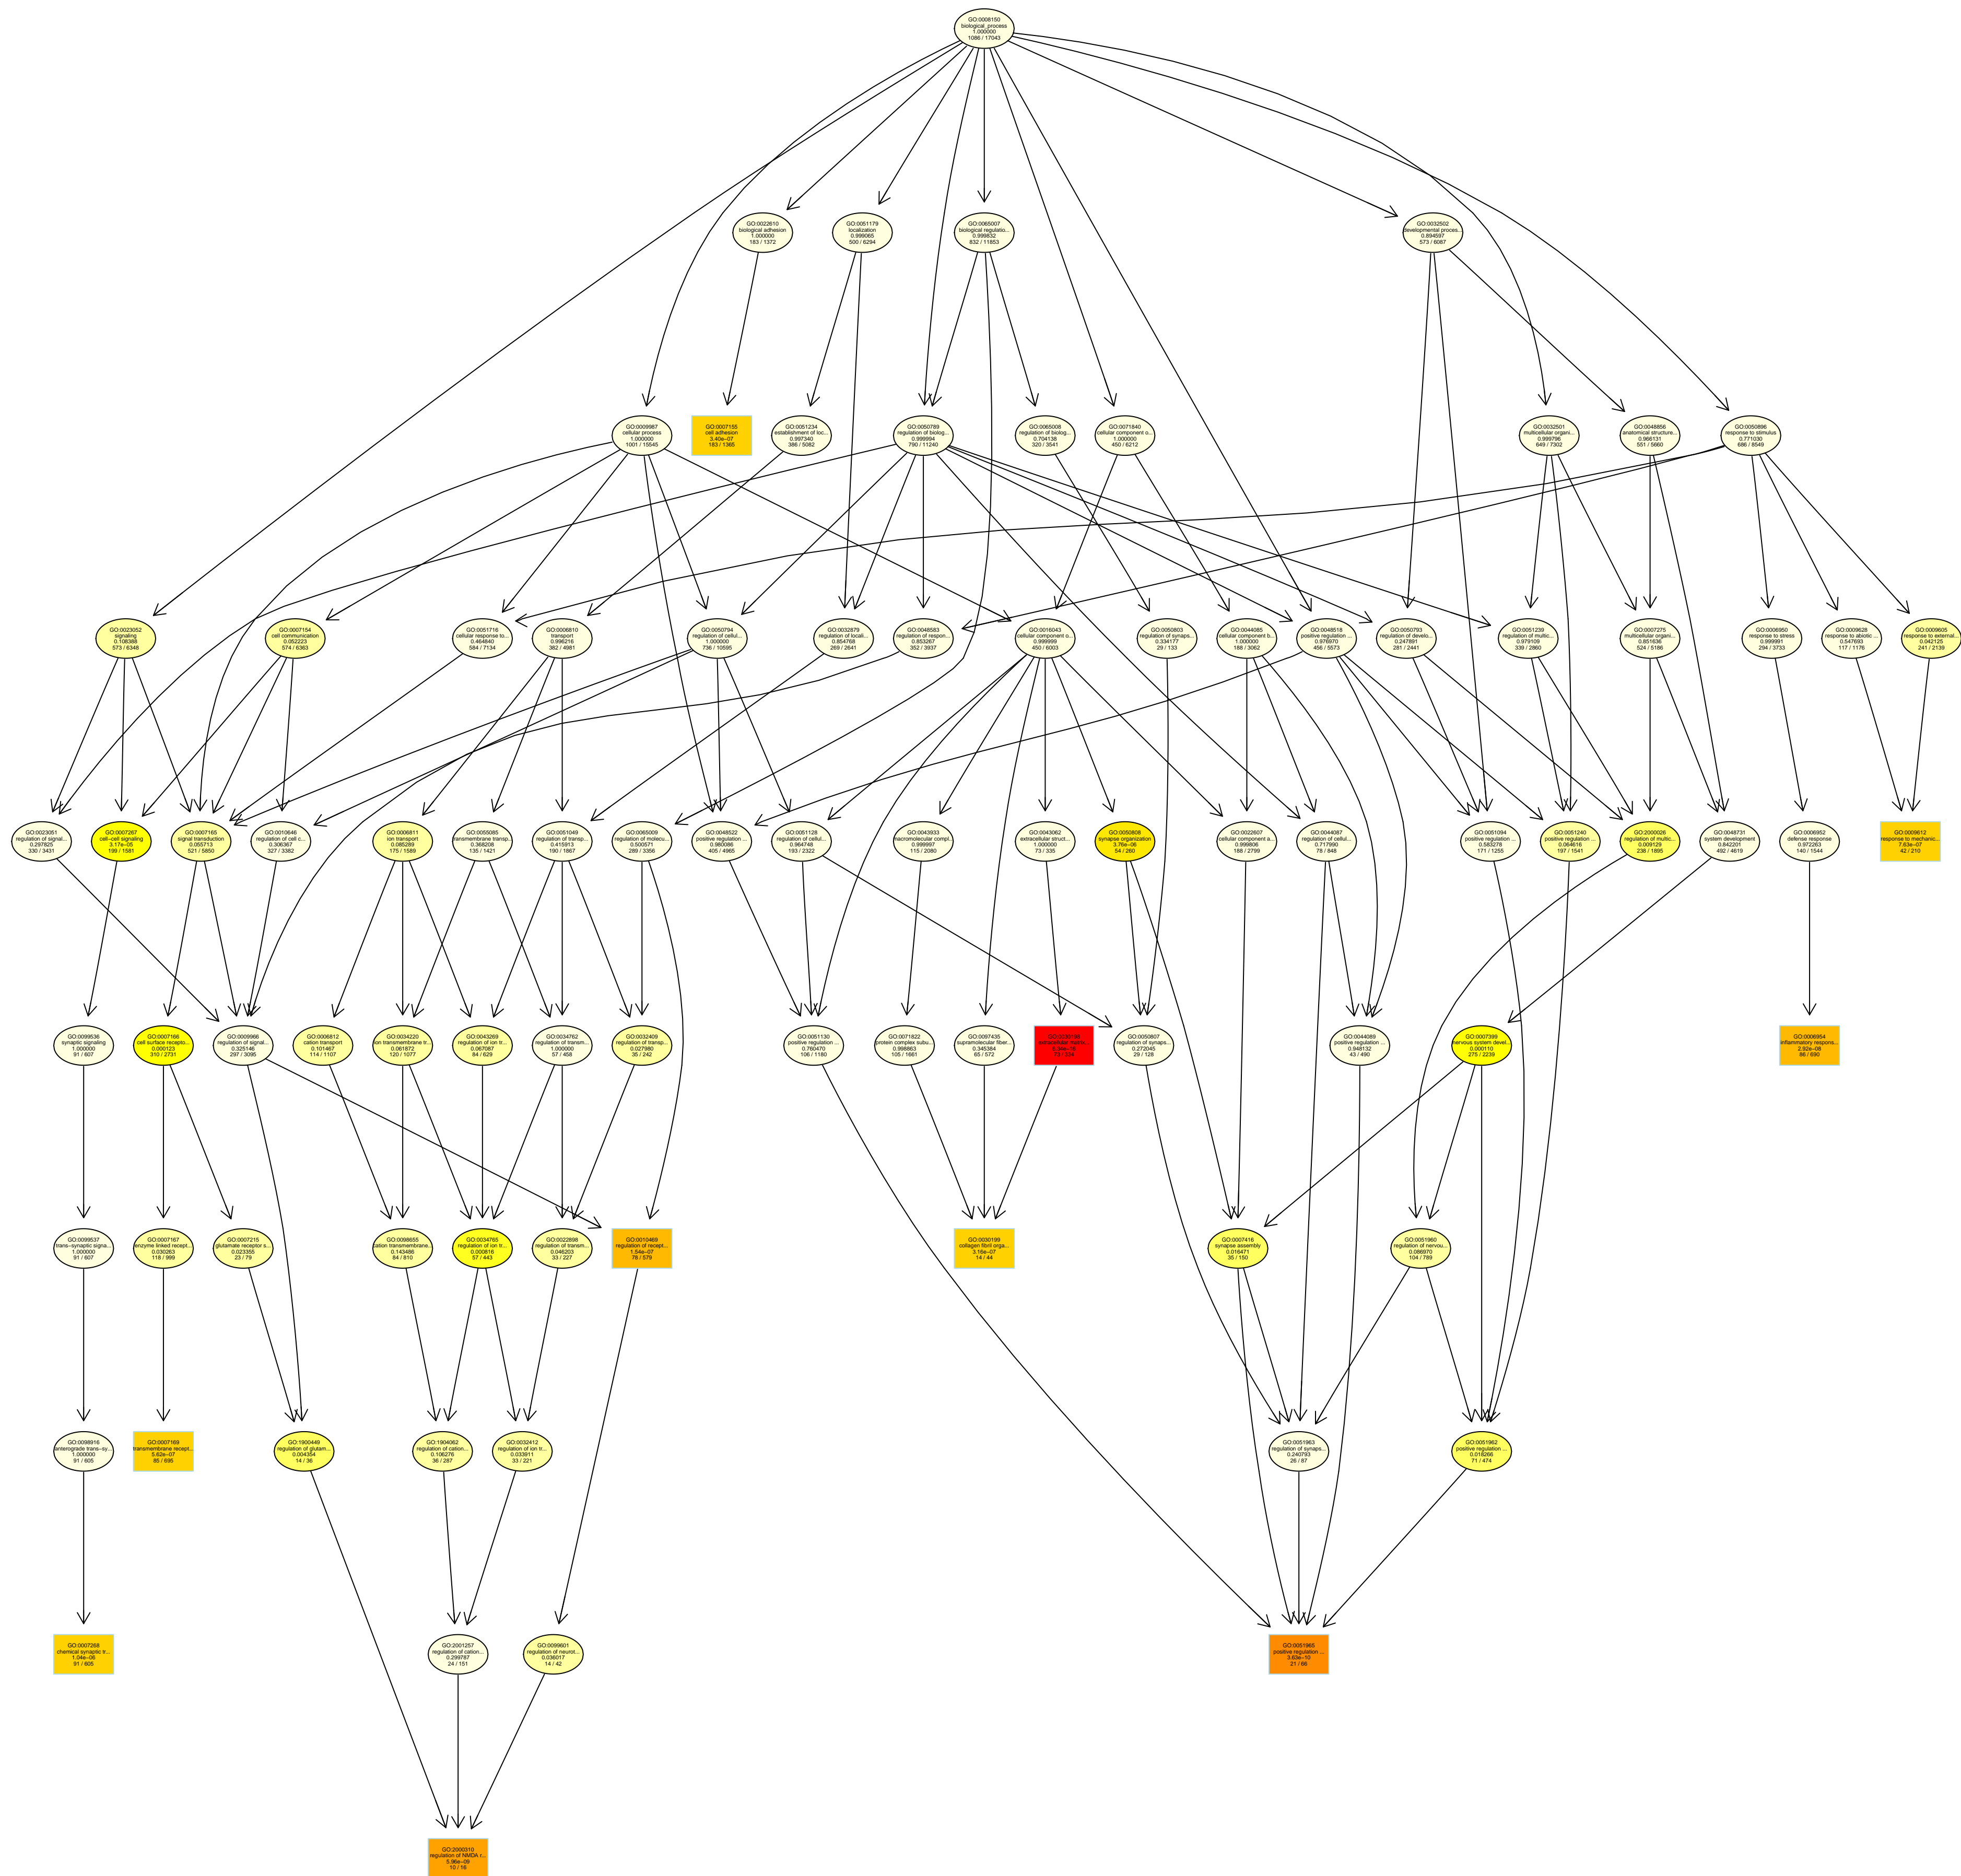

Supplement: Supplementary file 15 [file 14332325]

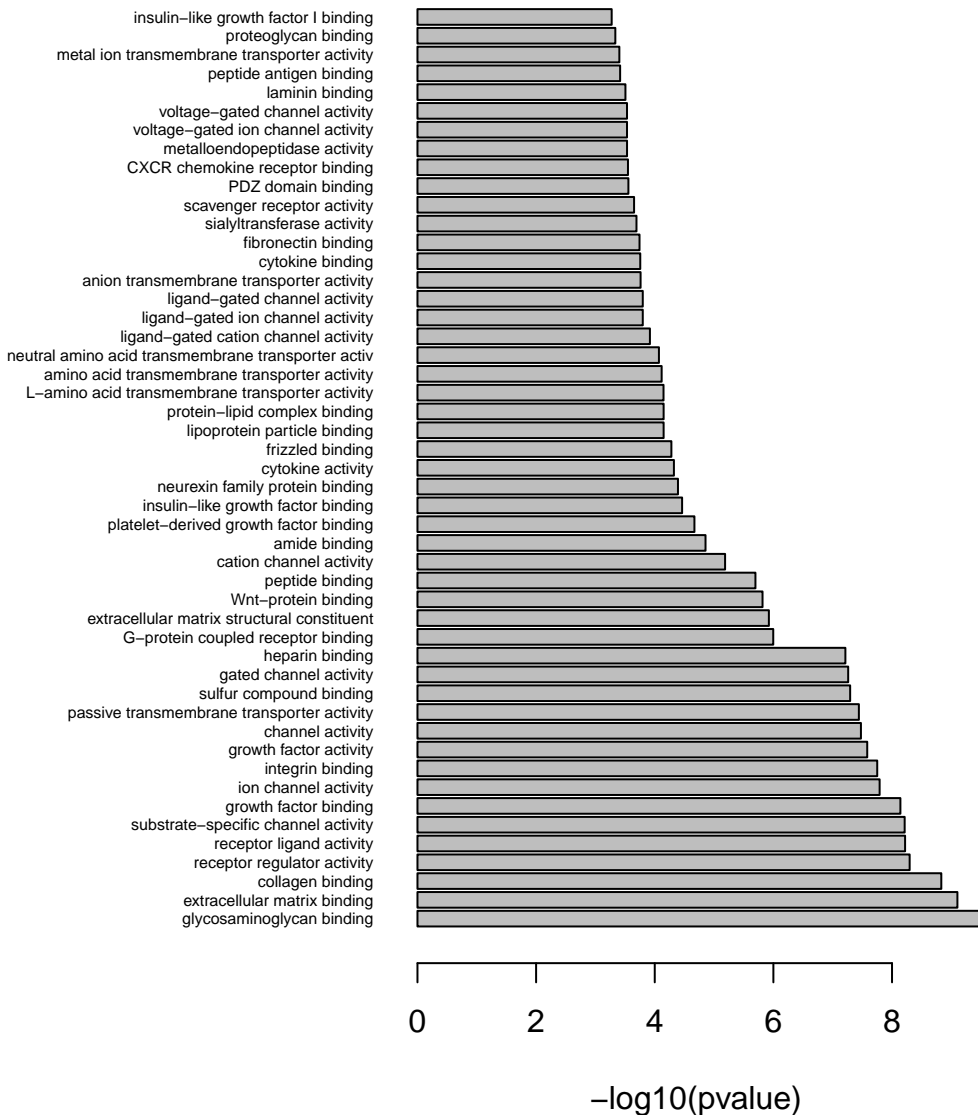

Supplement: Supplementary file 16 [file 14332325]

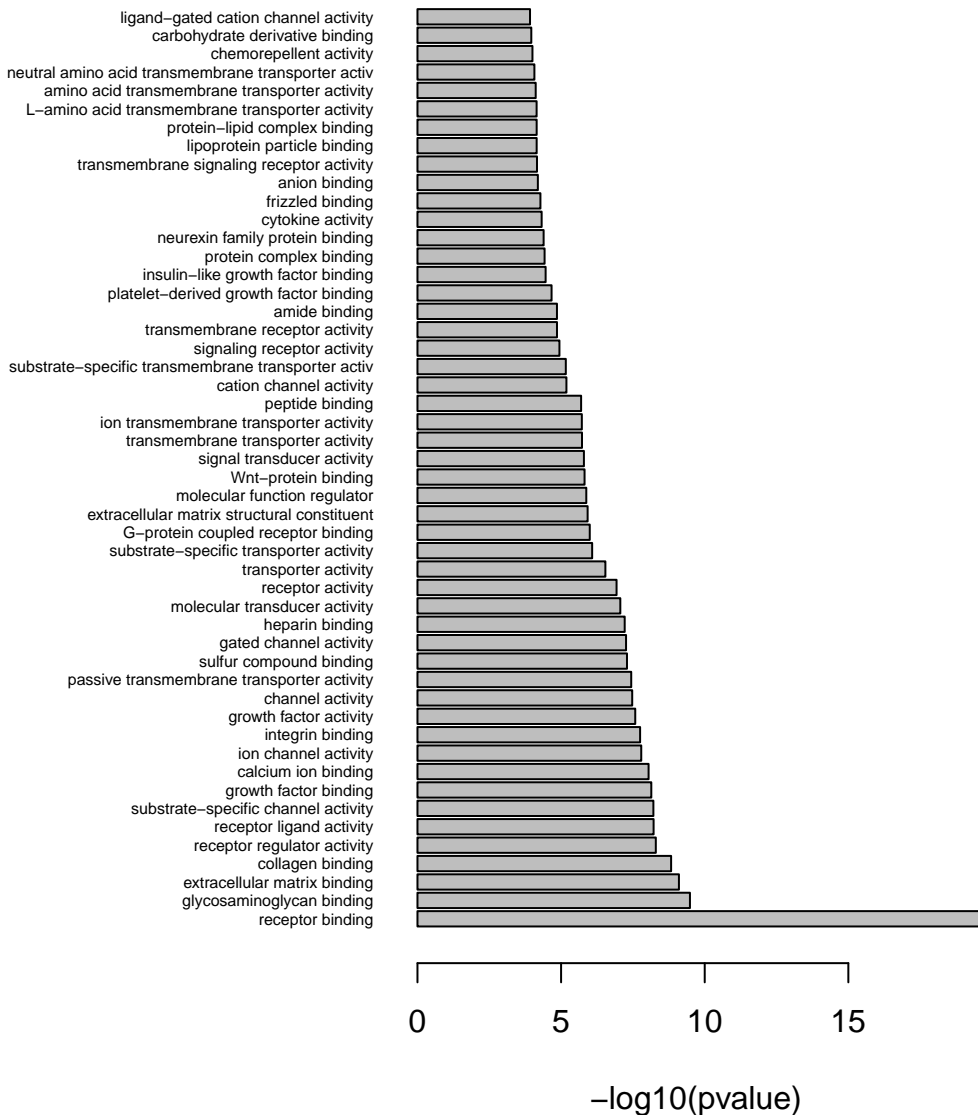

Supplement: Supplementary file 18 [file 14332325]

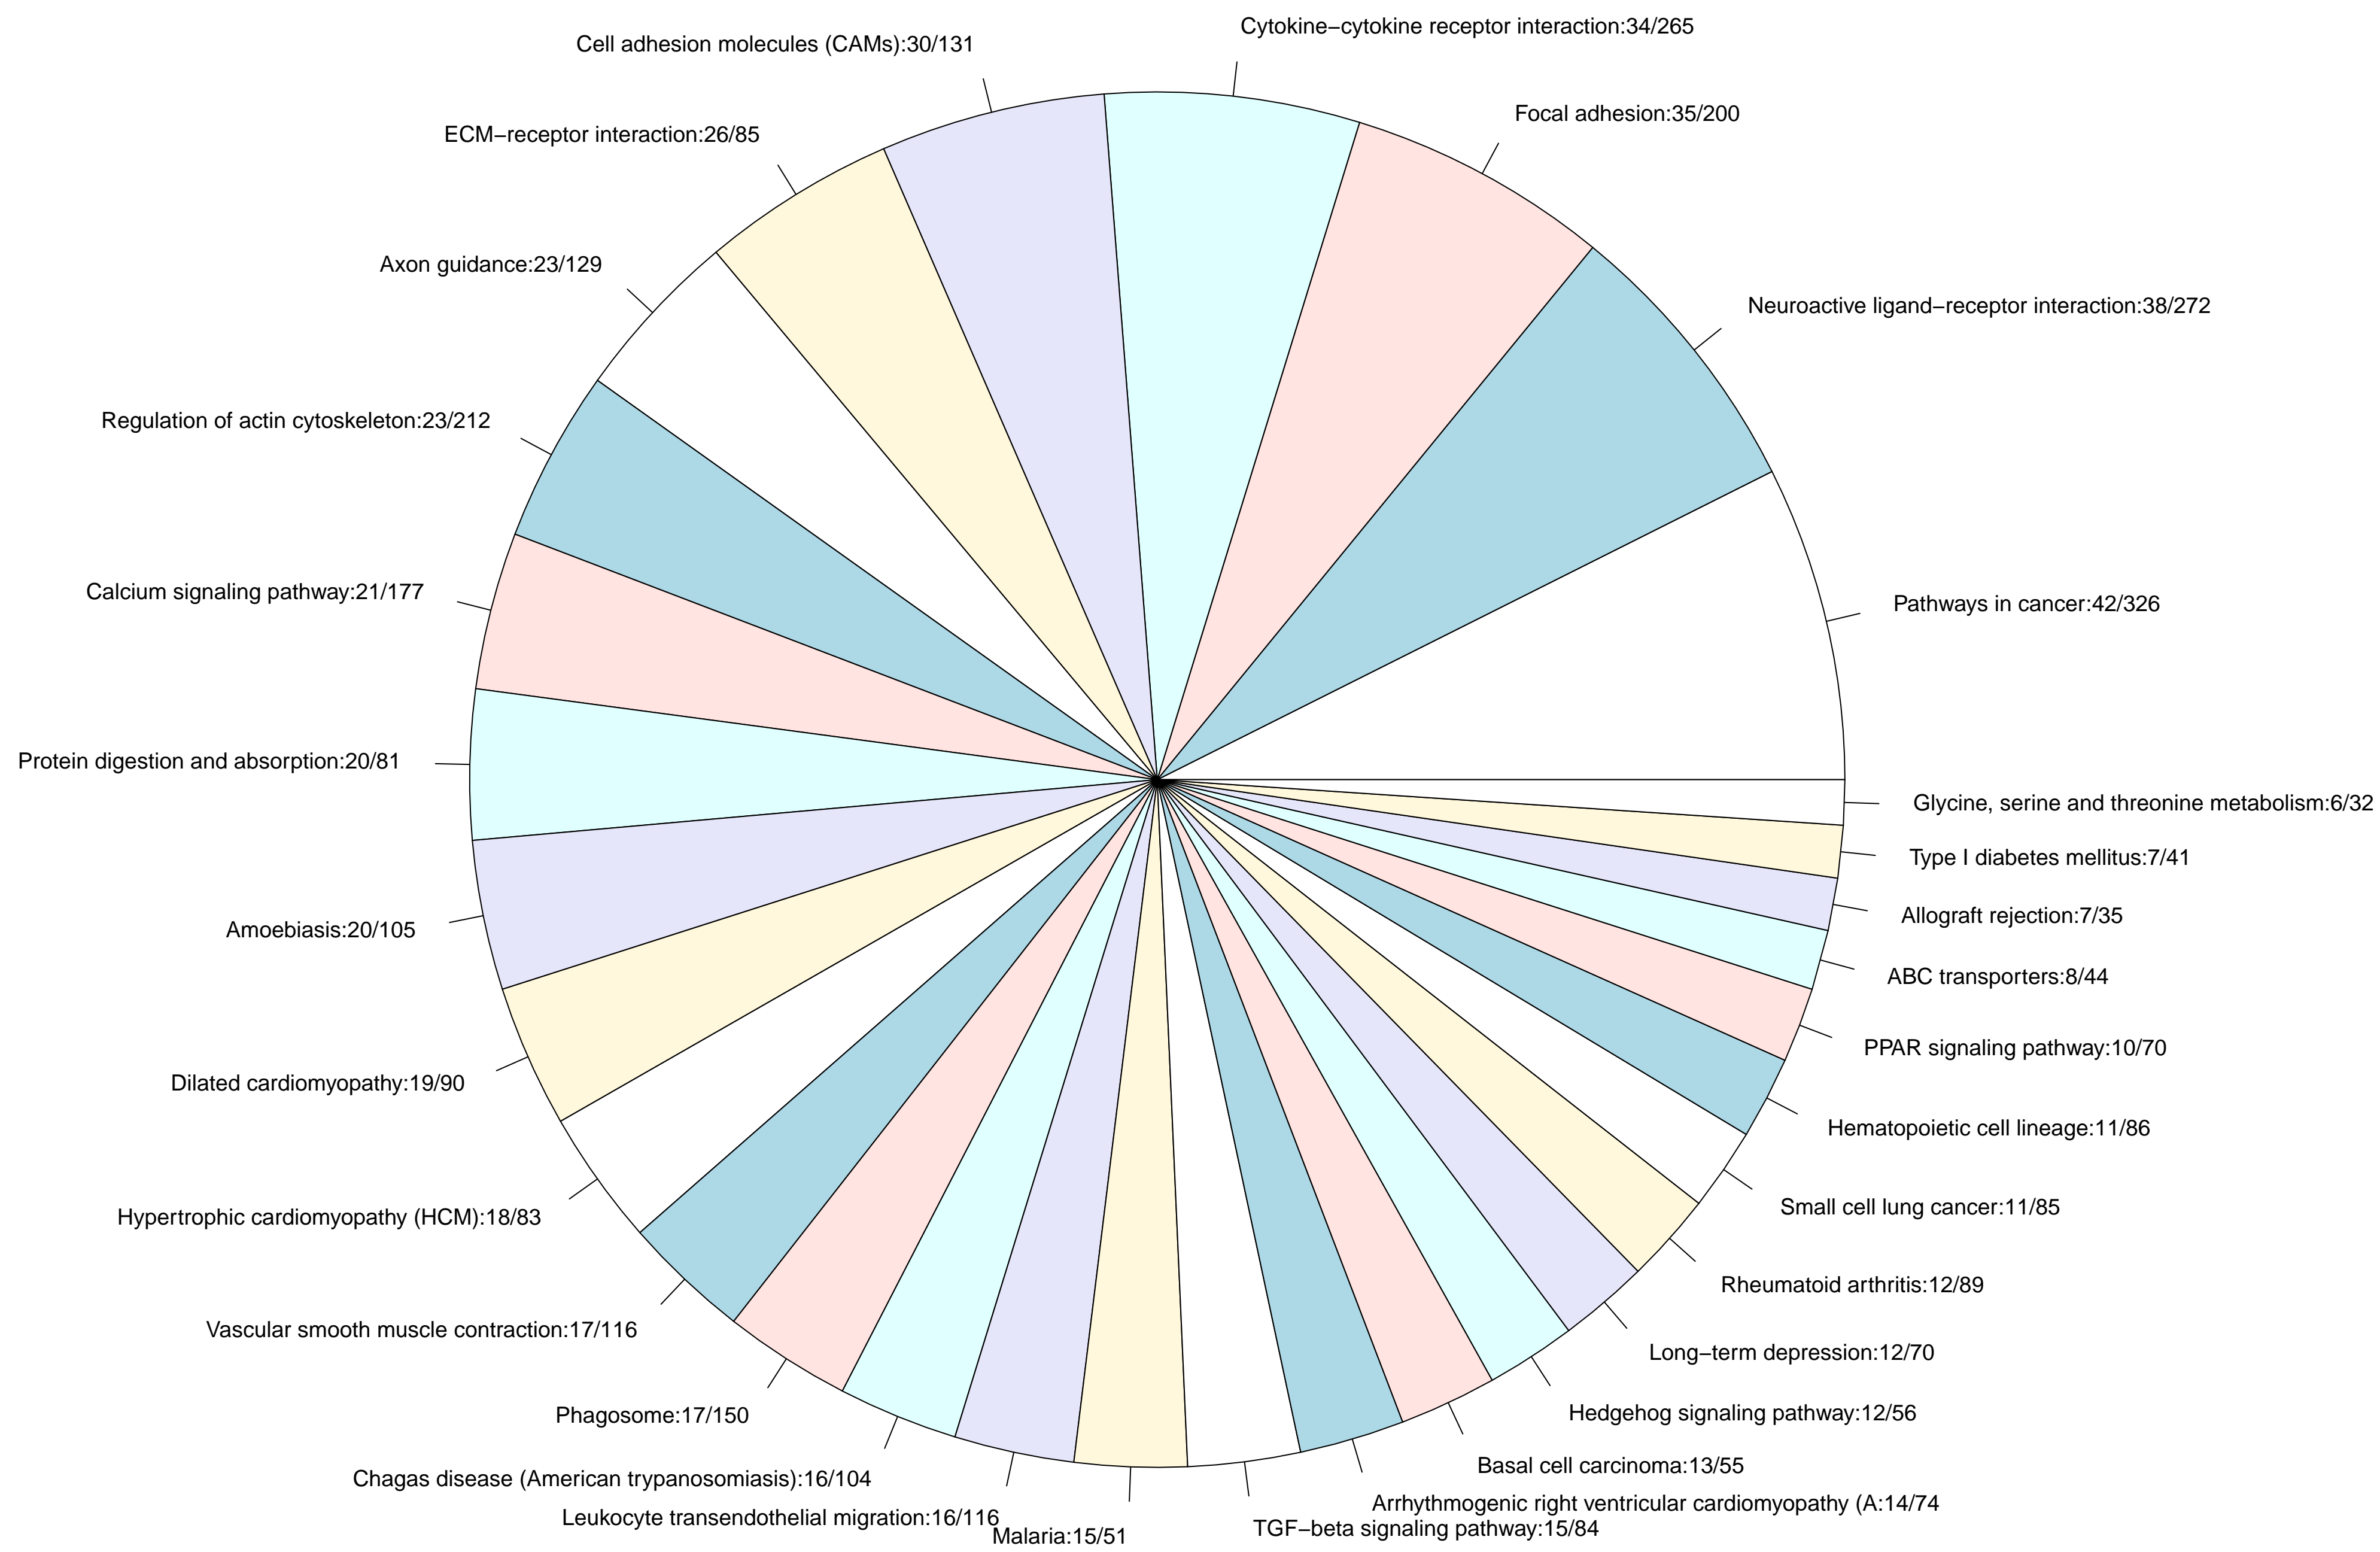

Supplement: Supplementary file 19 [file 14332325]

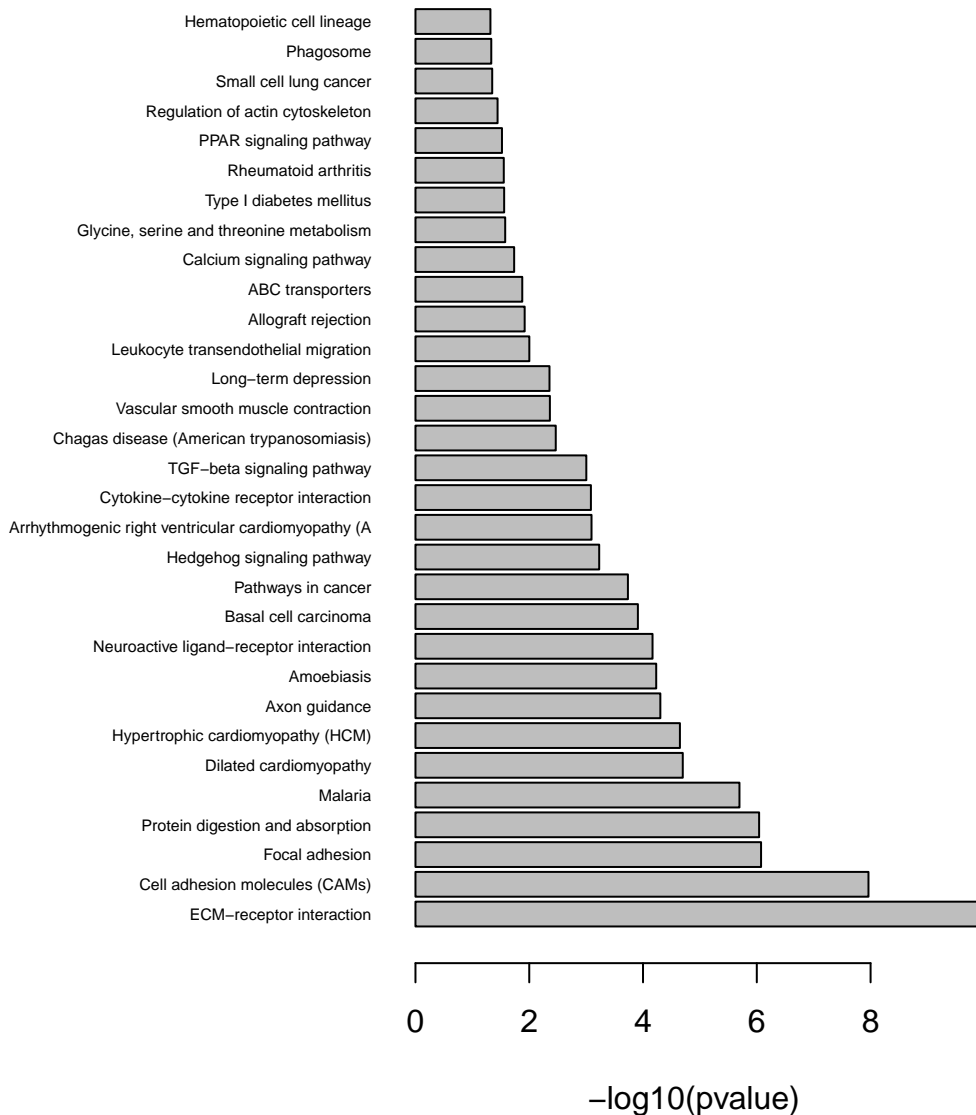

Supplement: Supplementary file 20 [file 14332325]

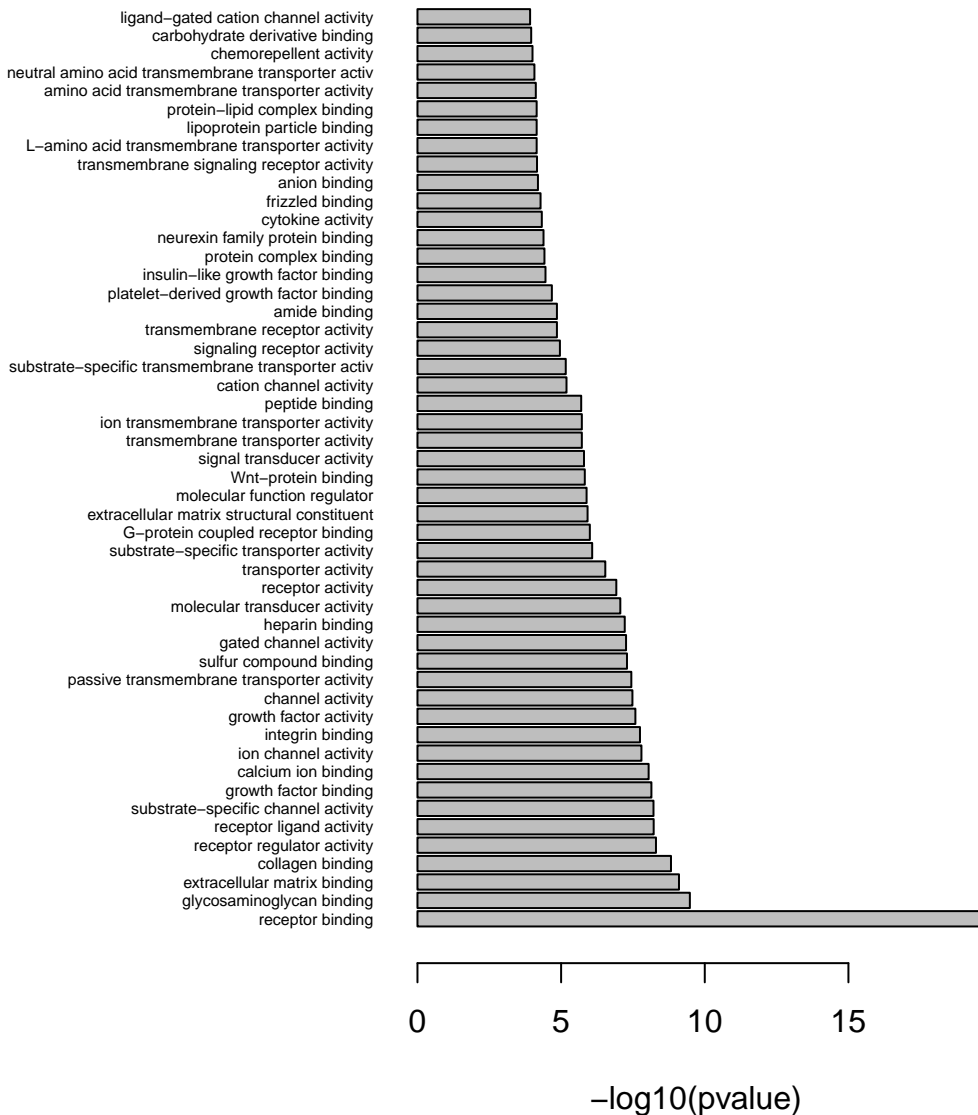

Supplement: Supplementary file 21 [file 14332325]

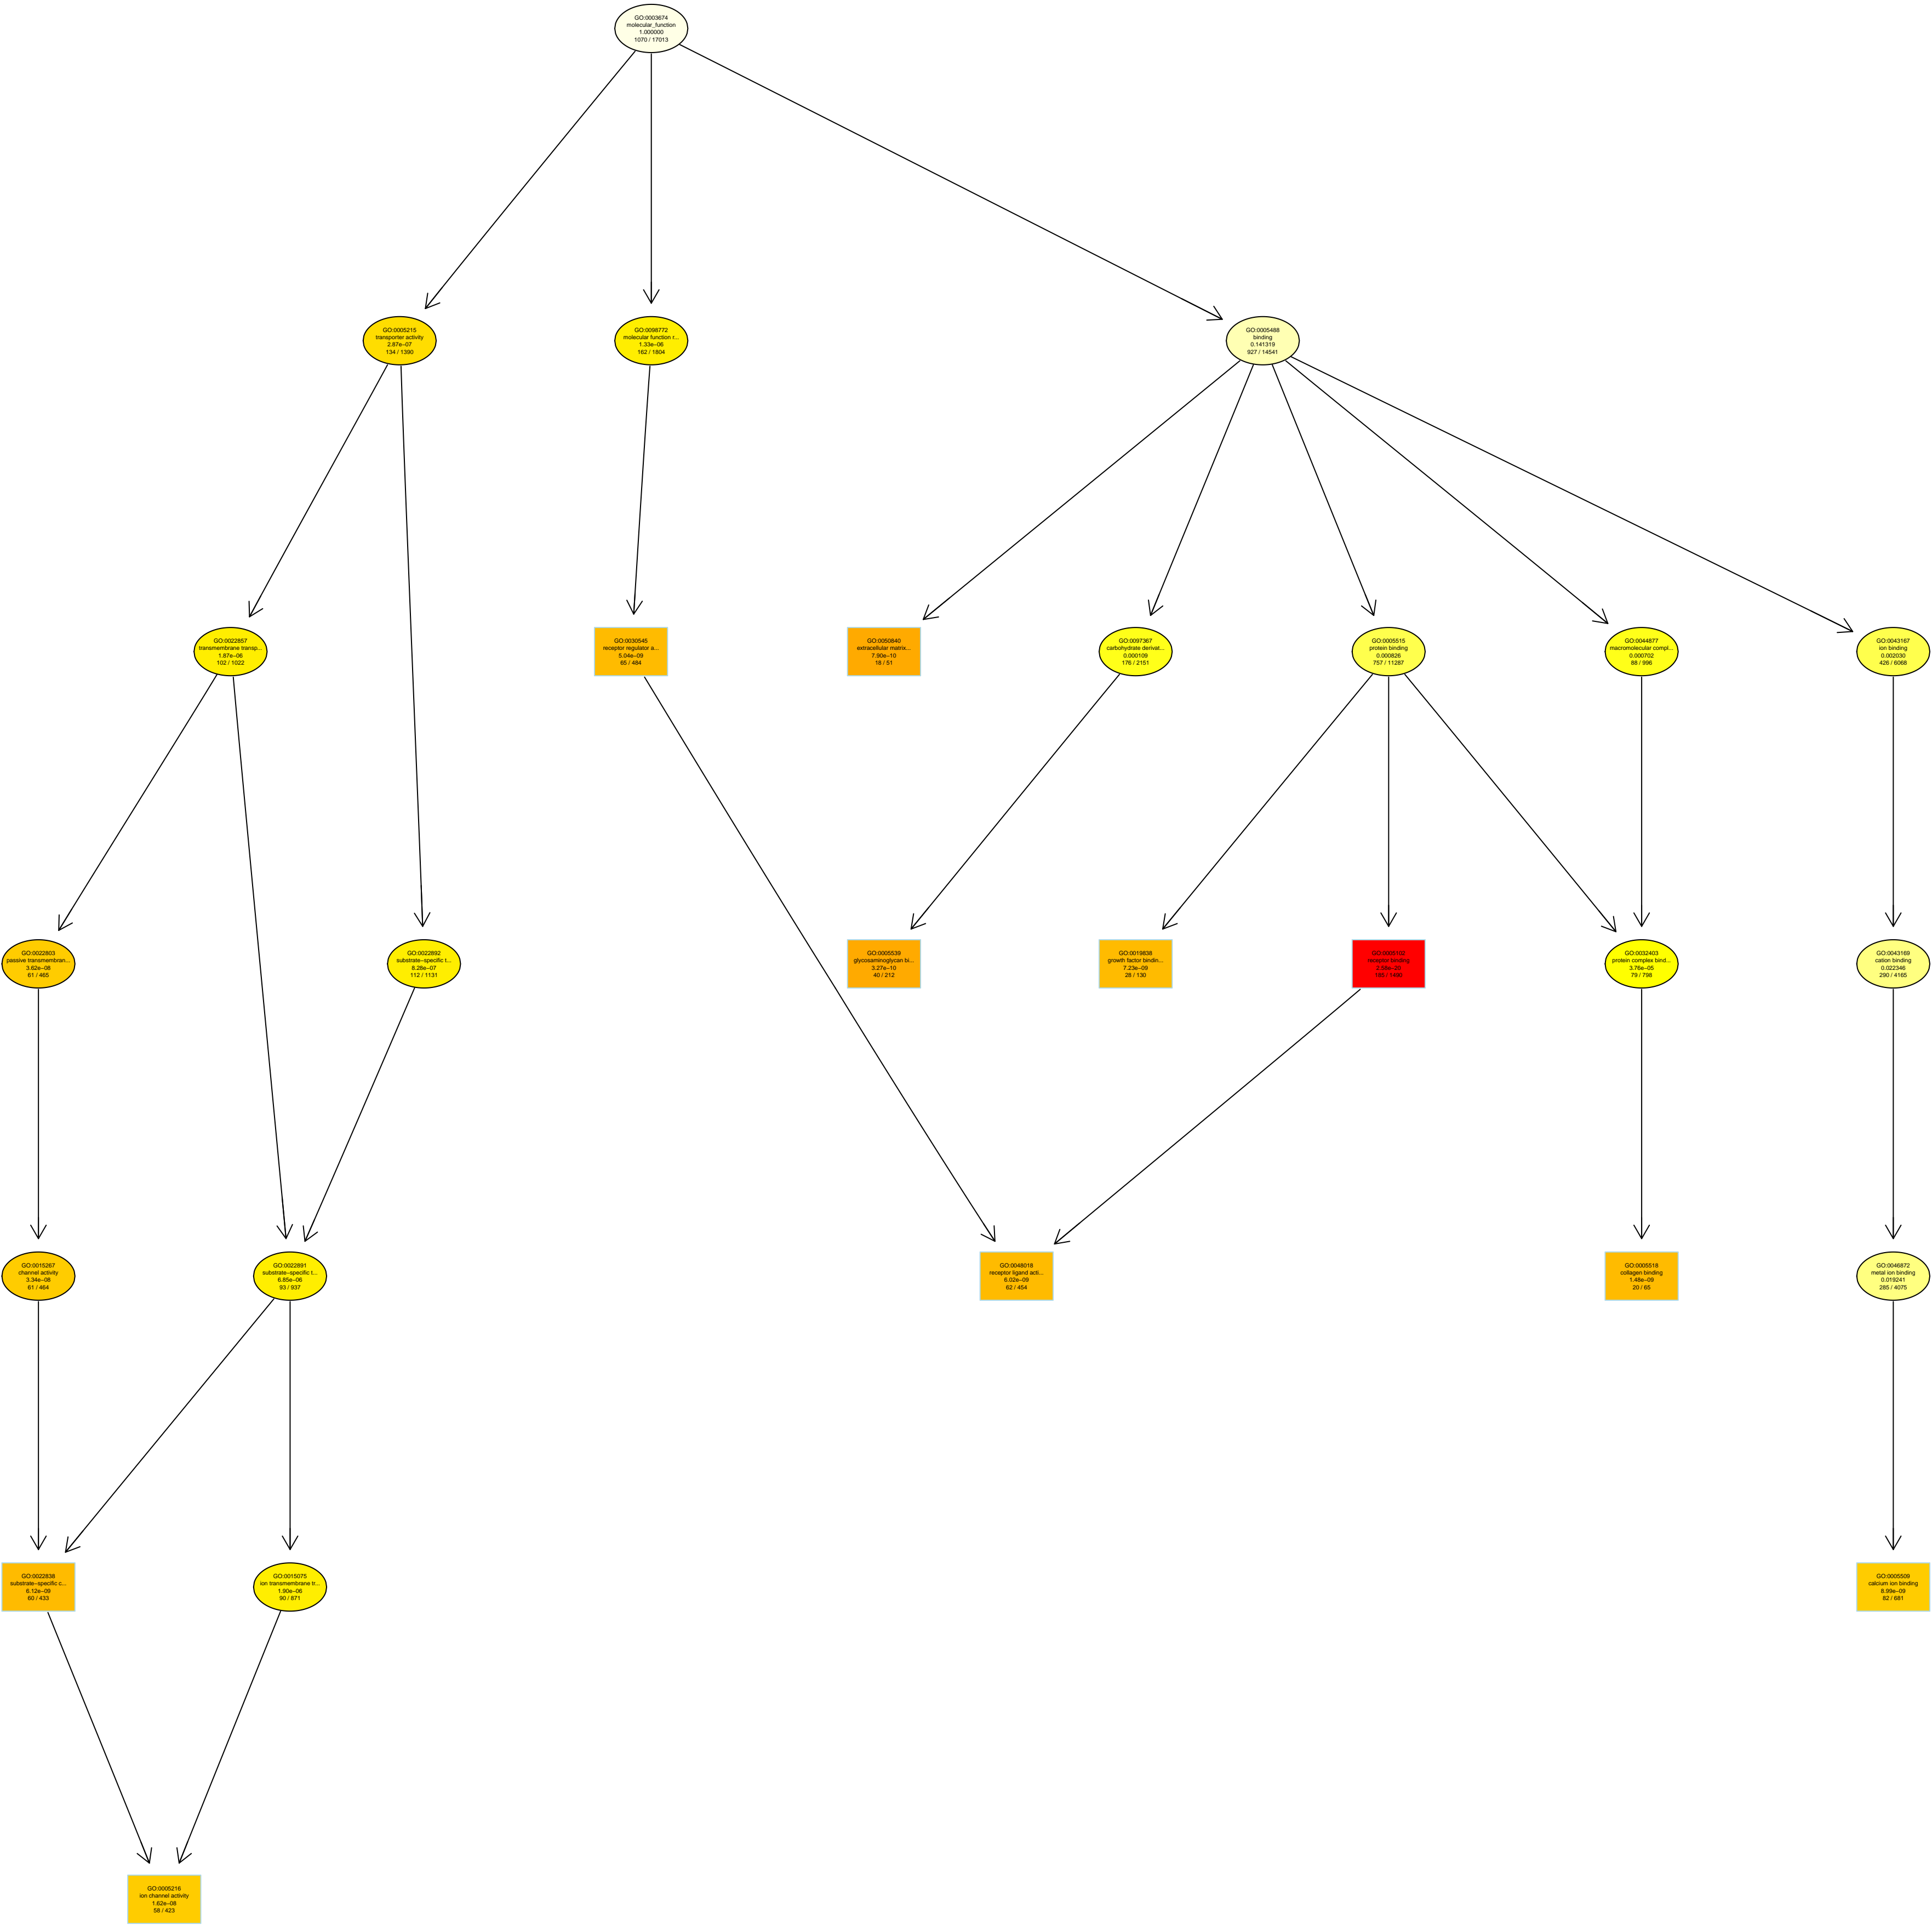

Supplement: Supplementary file 22 [file 14332325]

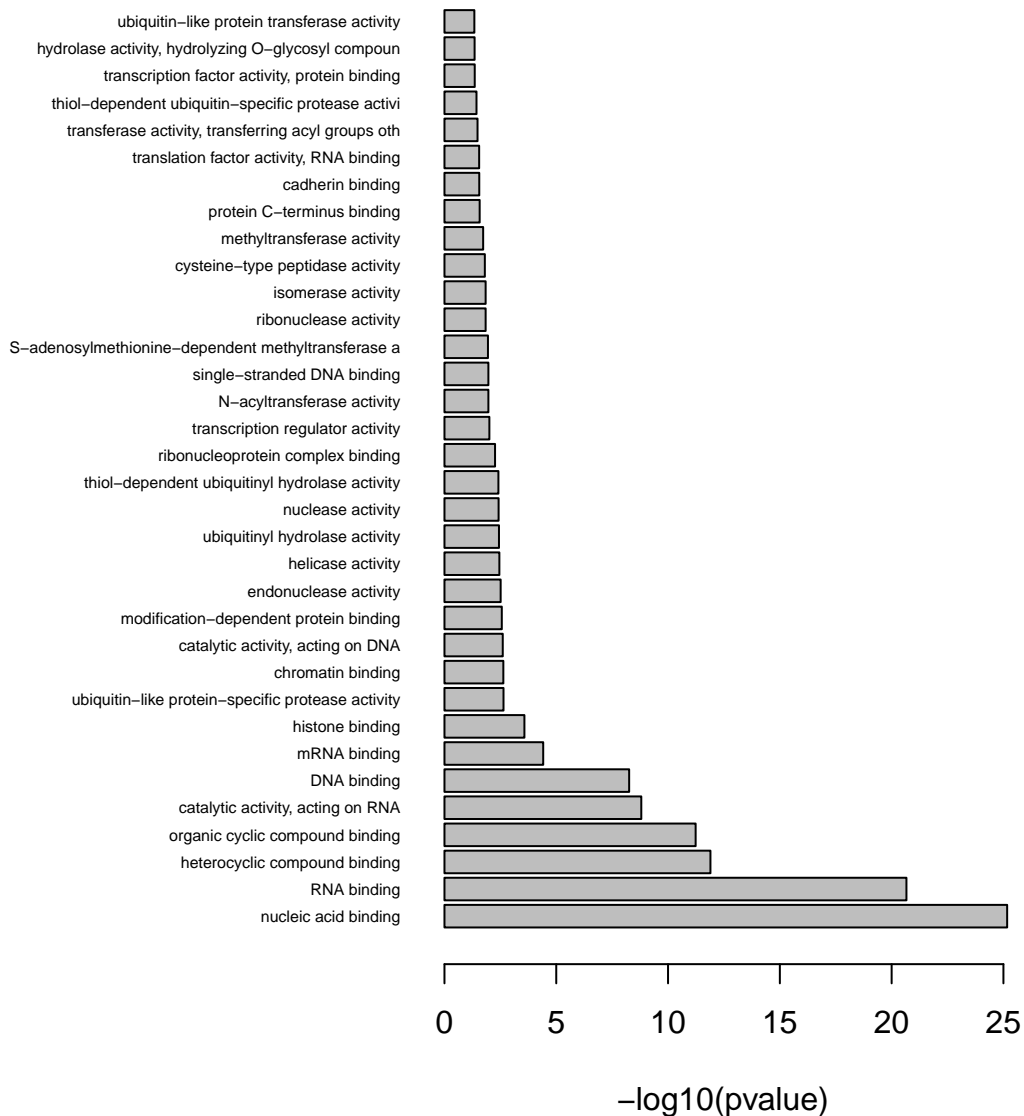

Supplement: Supplementary file 23 [file 14332325]

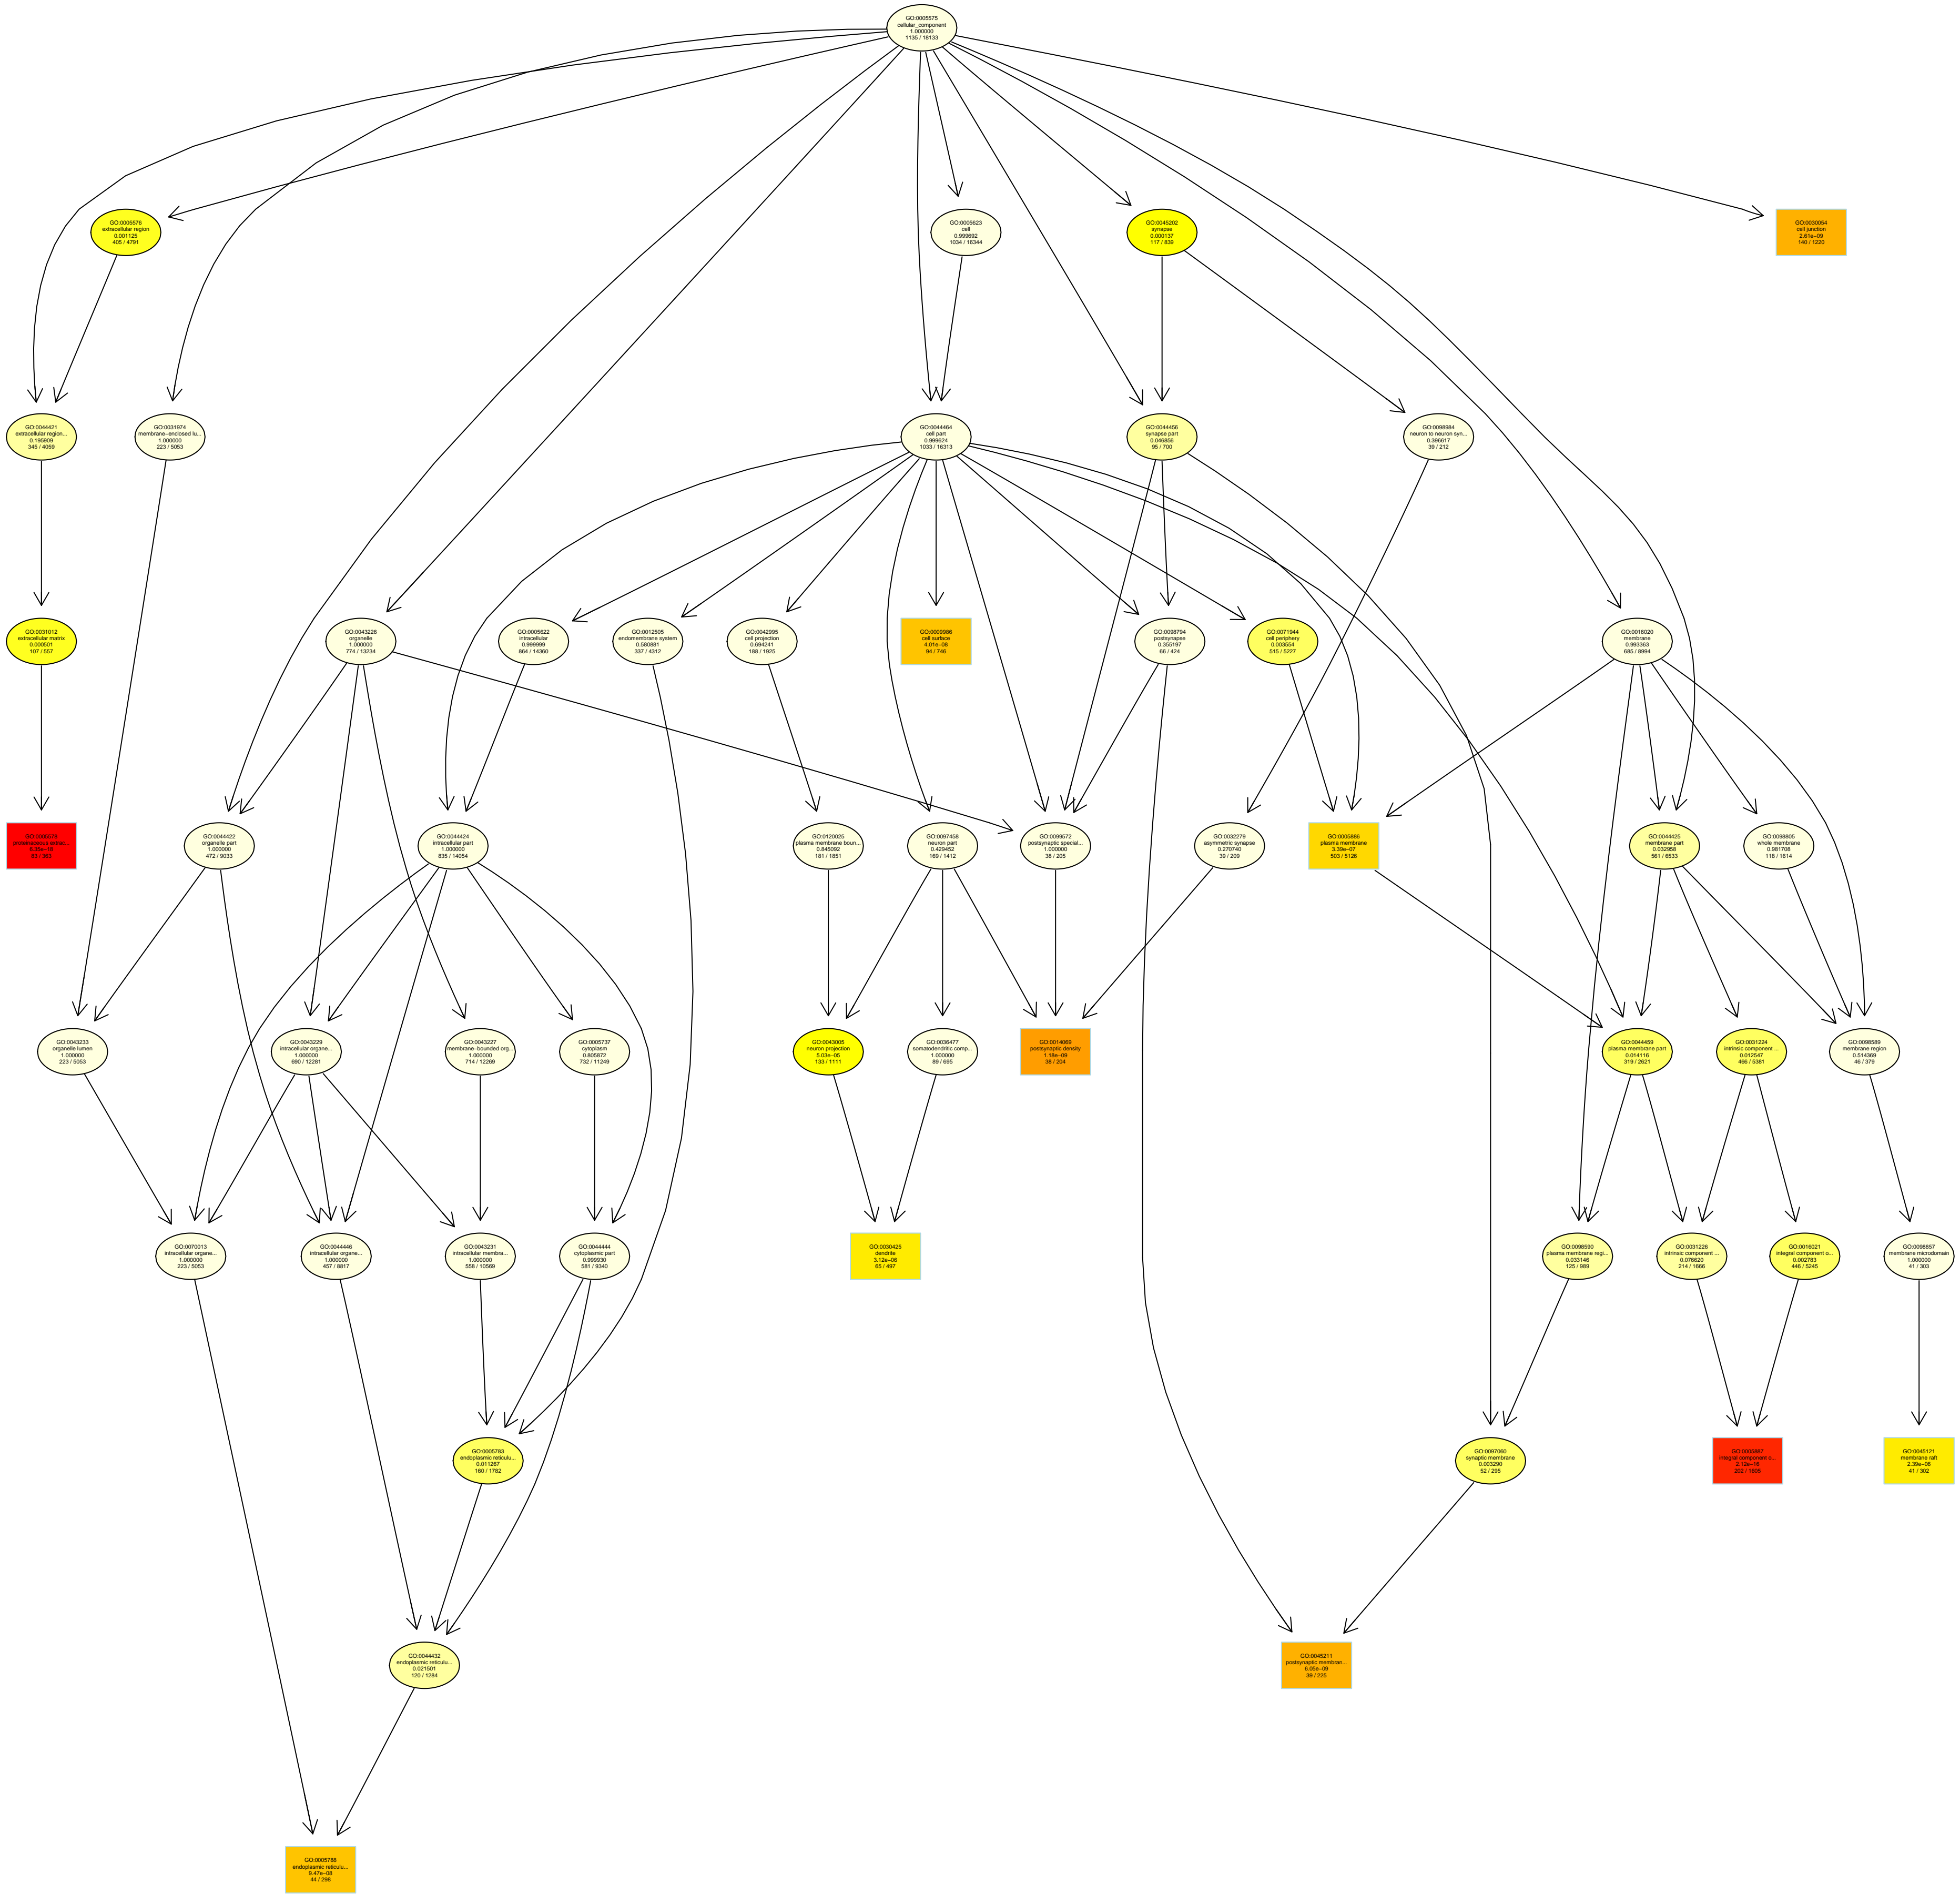

Supplement: Supplementary file 24 [file 14332325]

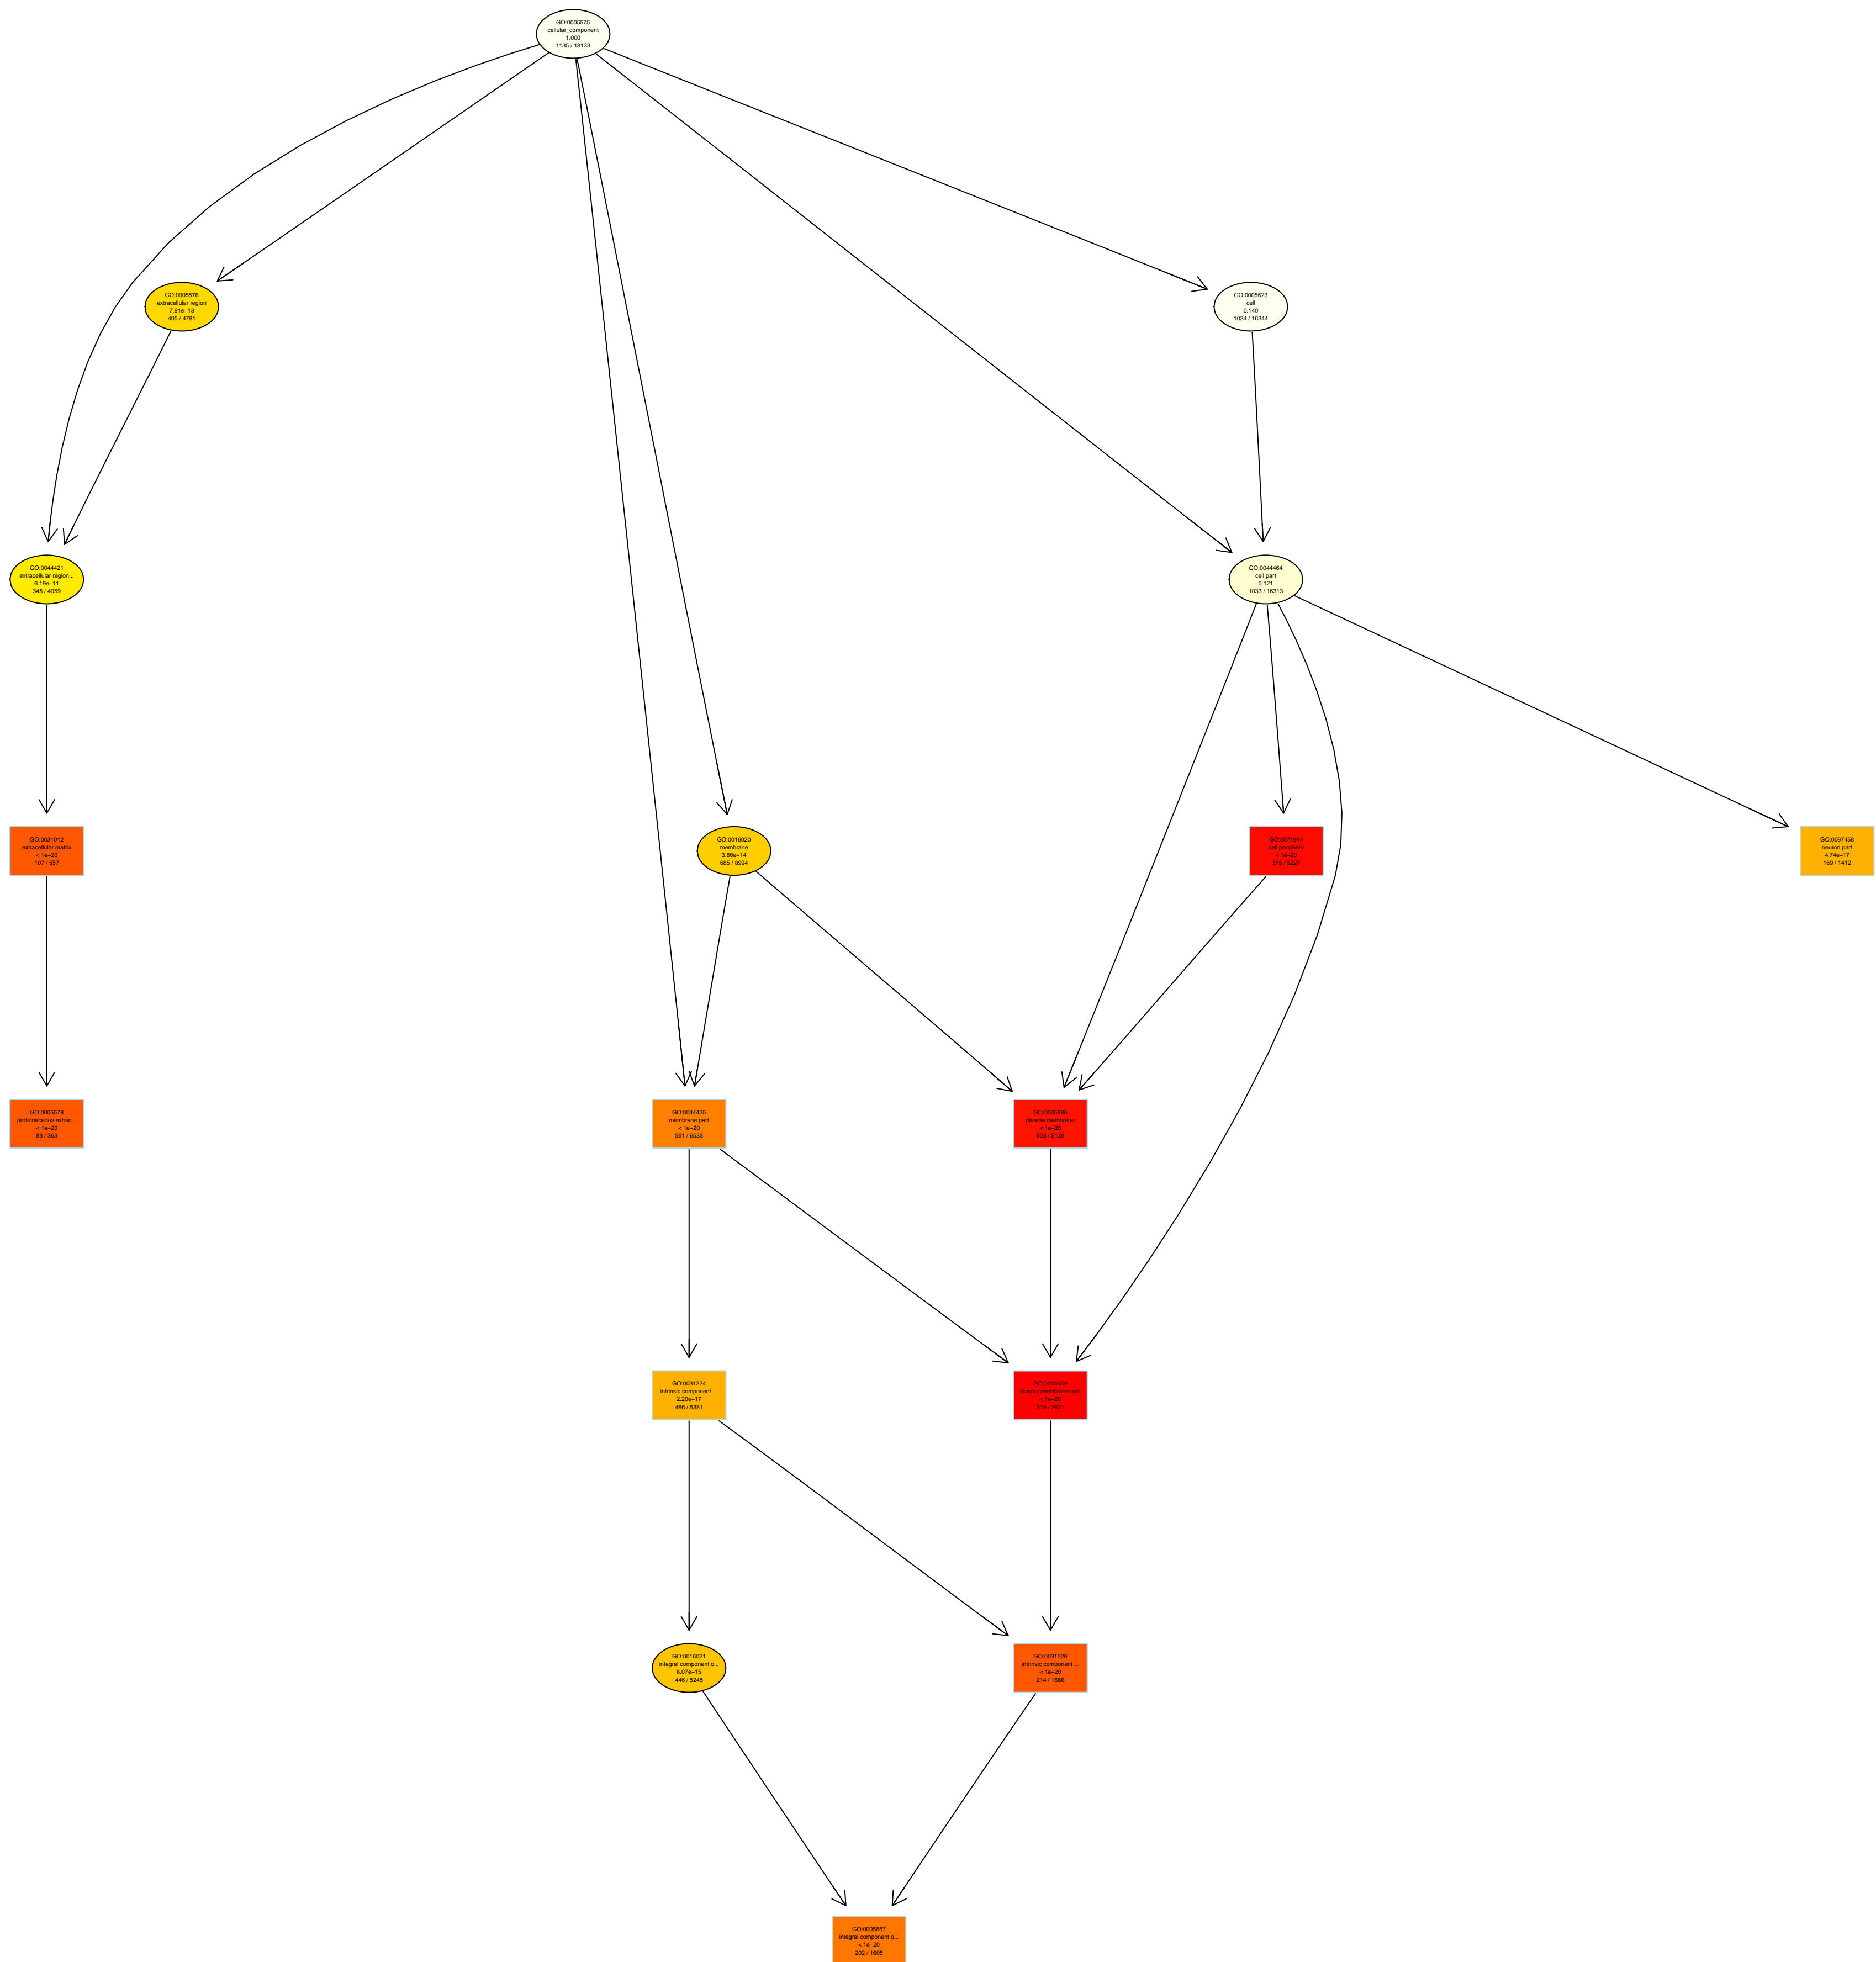

Supplement: Supplementary file 25 [file 14332325]

topGO\_BP\_classicfisher\_pieChart

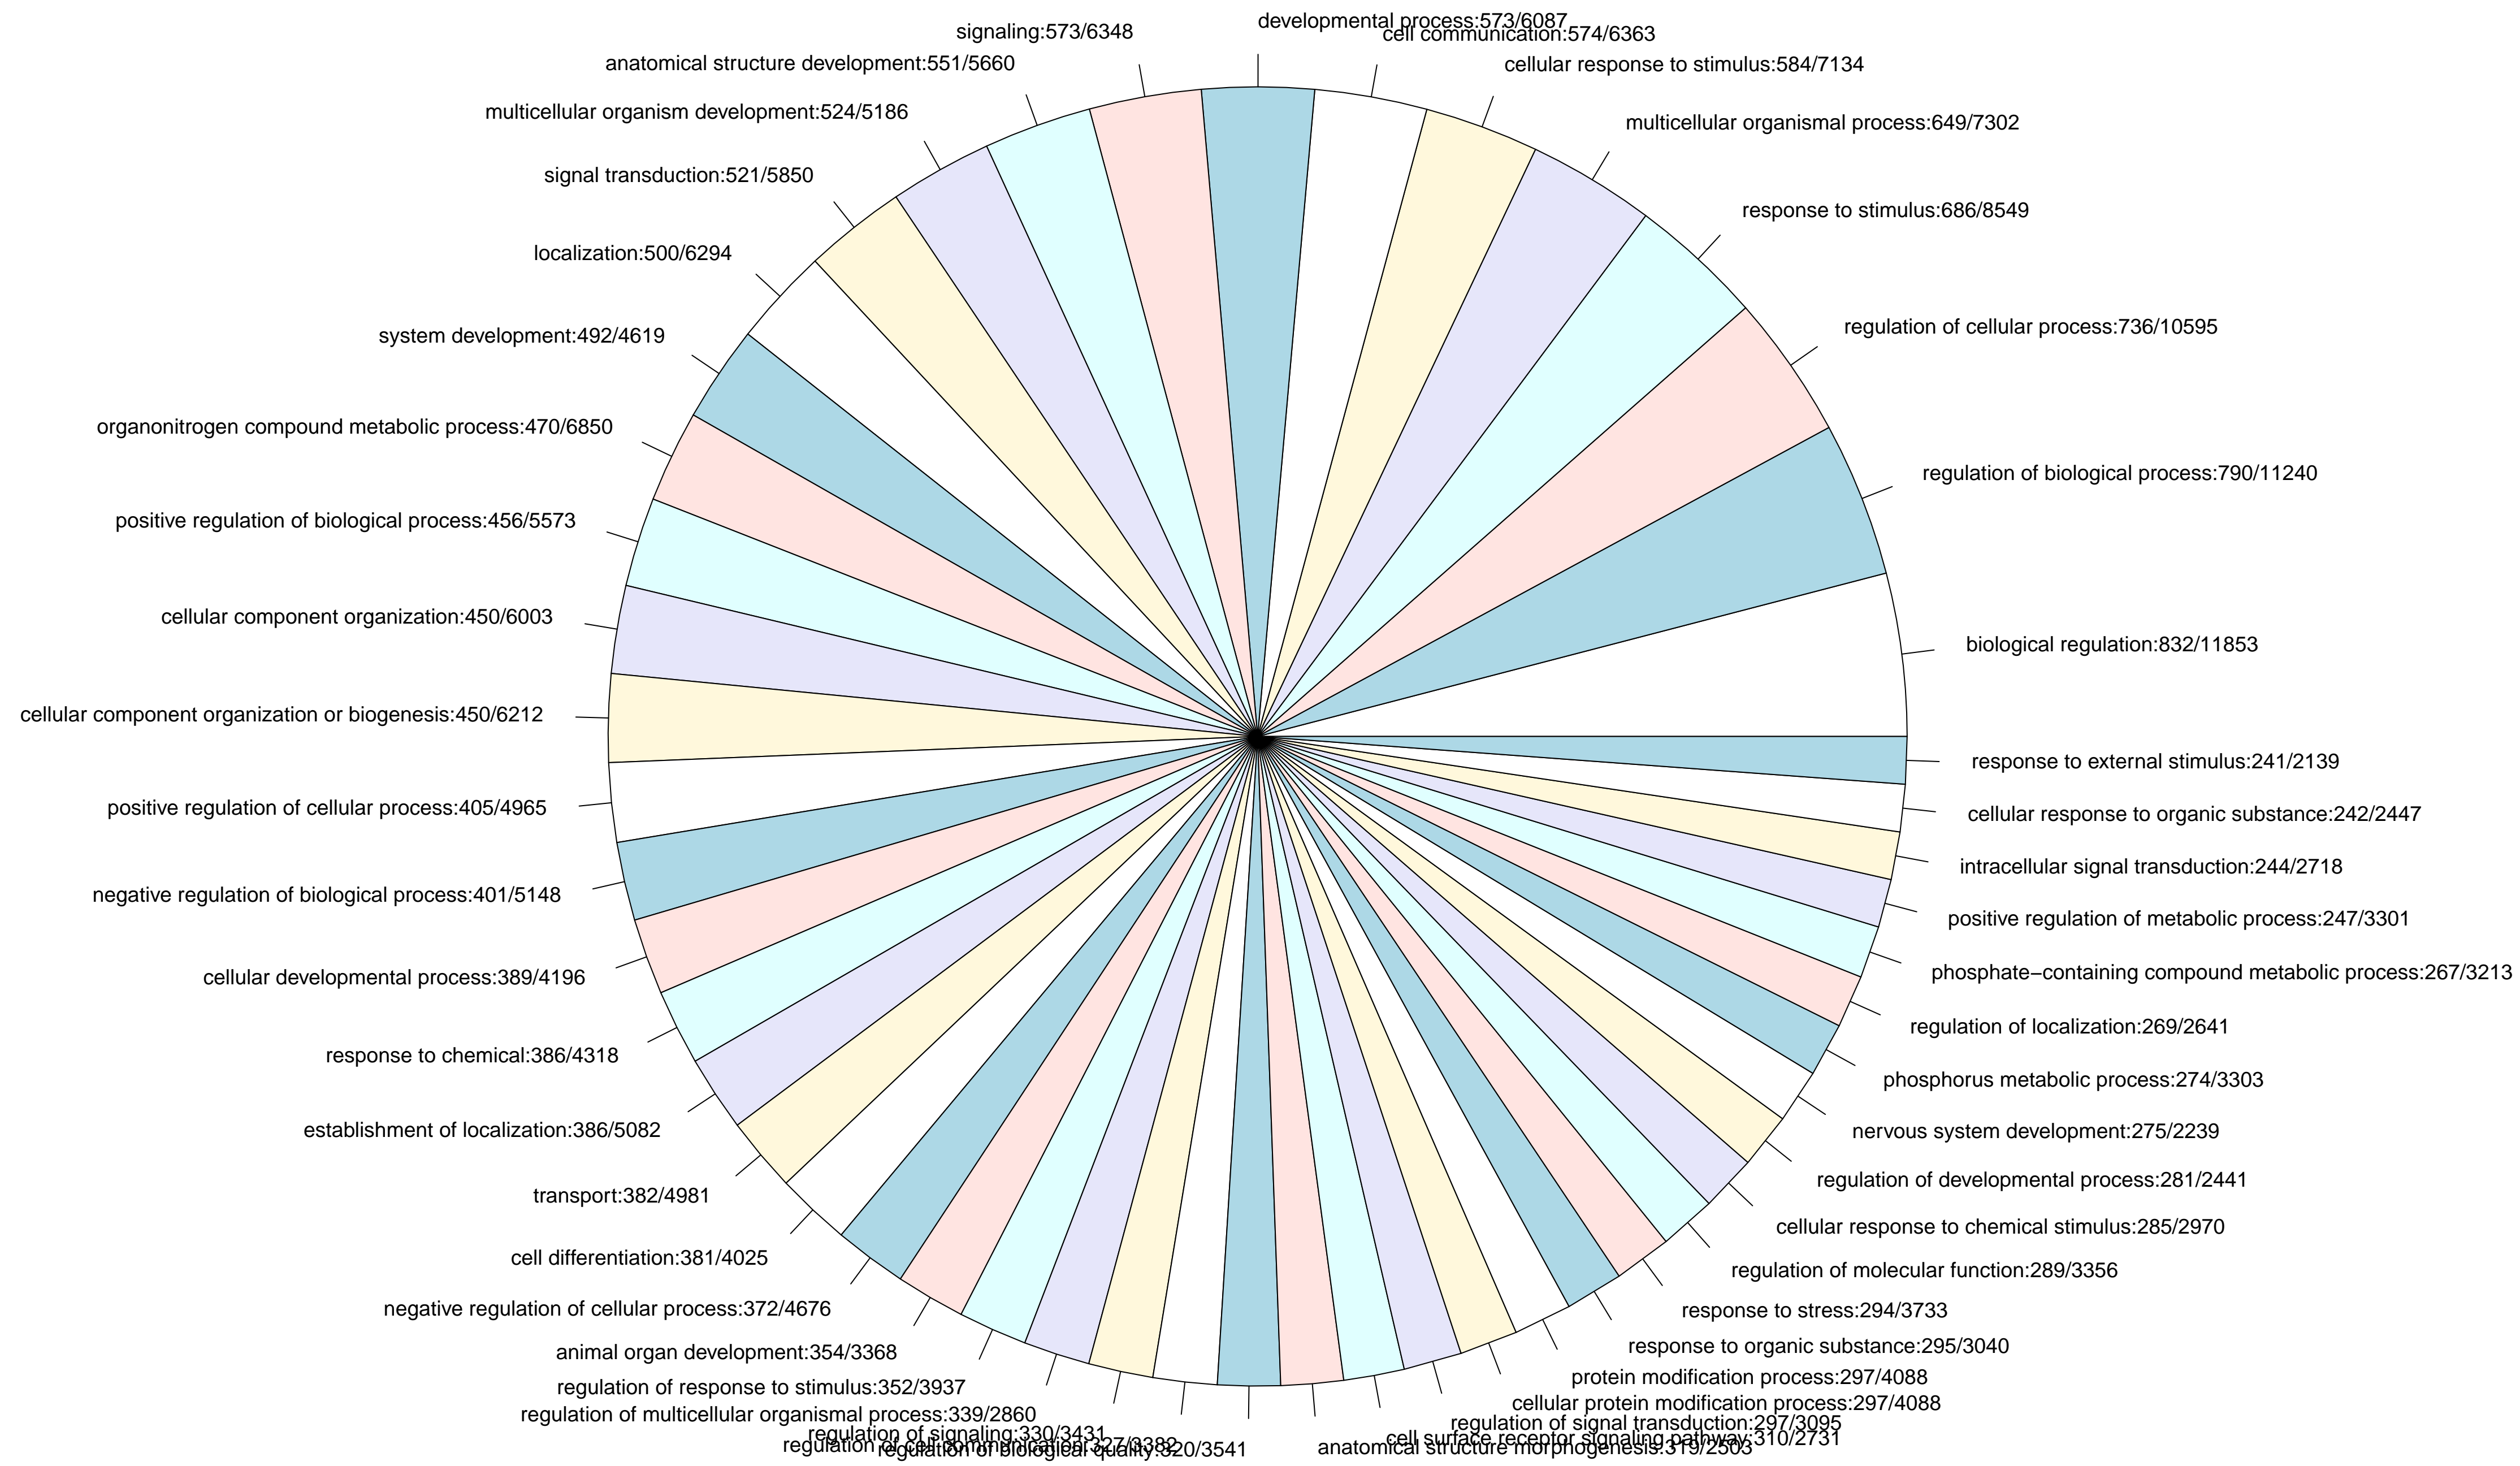

Supplement: Supplementary file 26 [file 14332325]

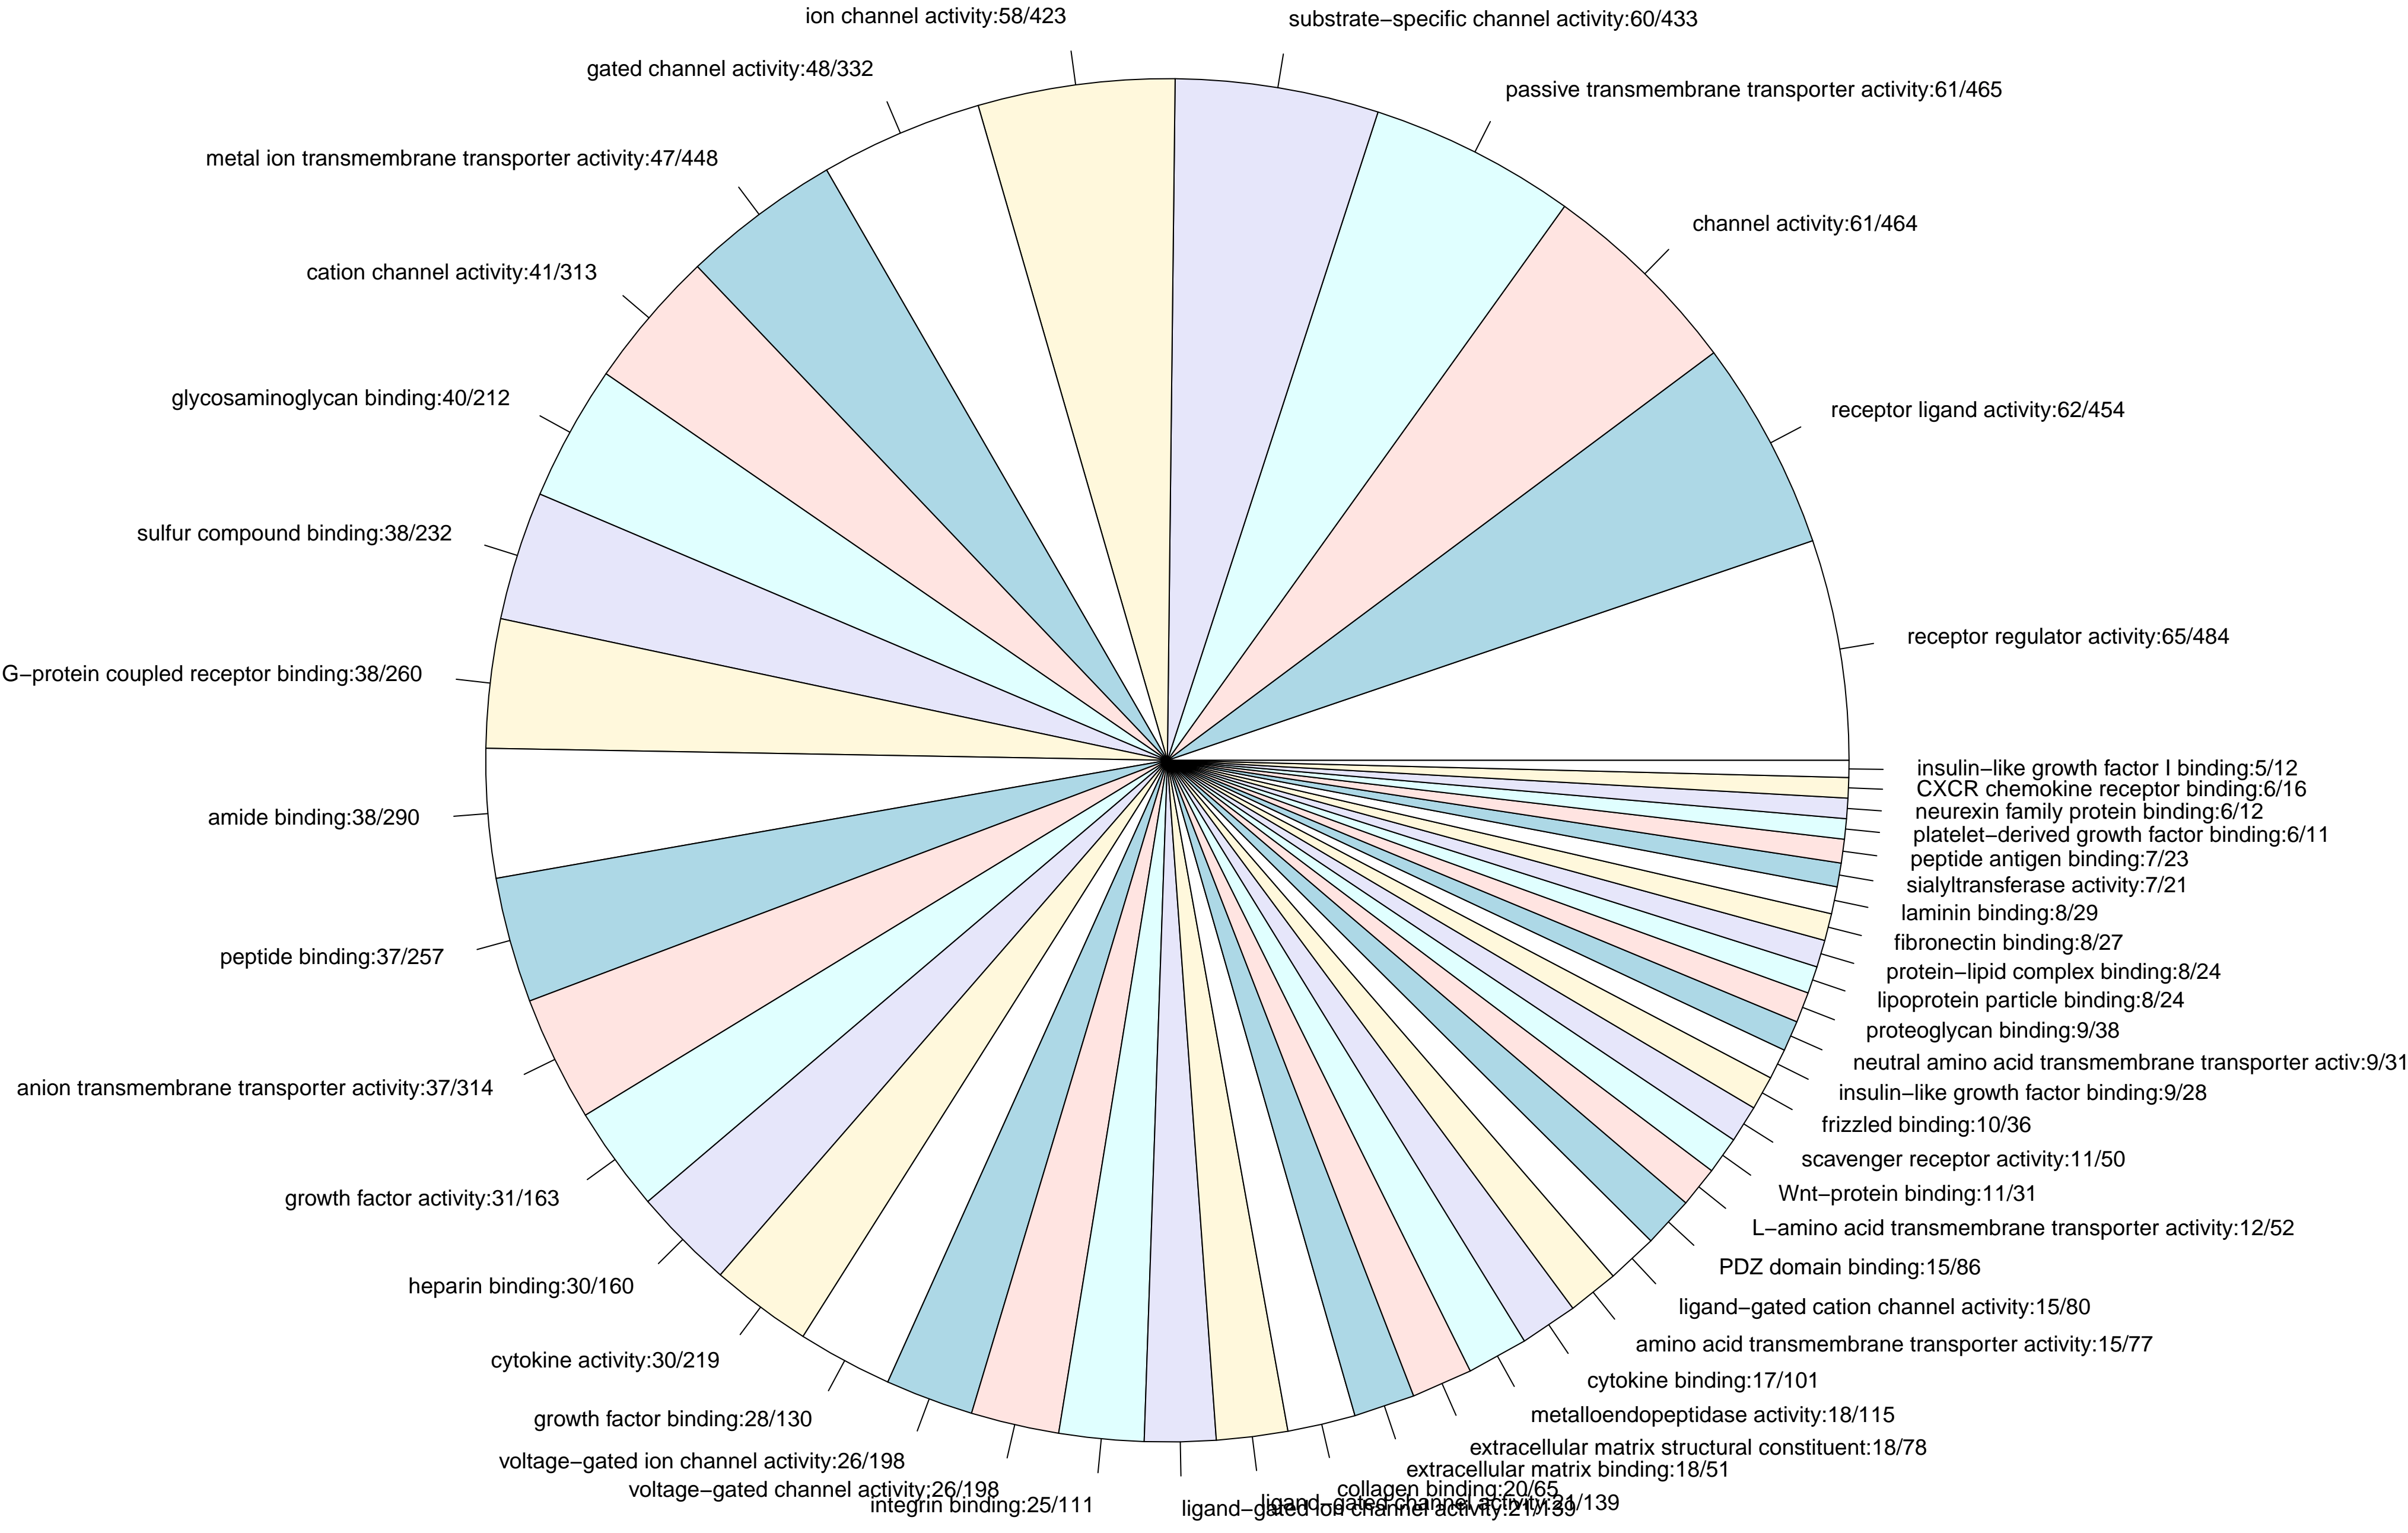

Supplement: Supplementary file 27 [file 14332325]

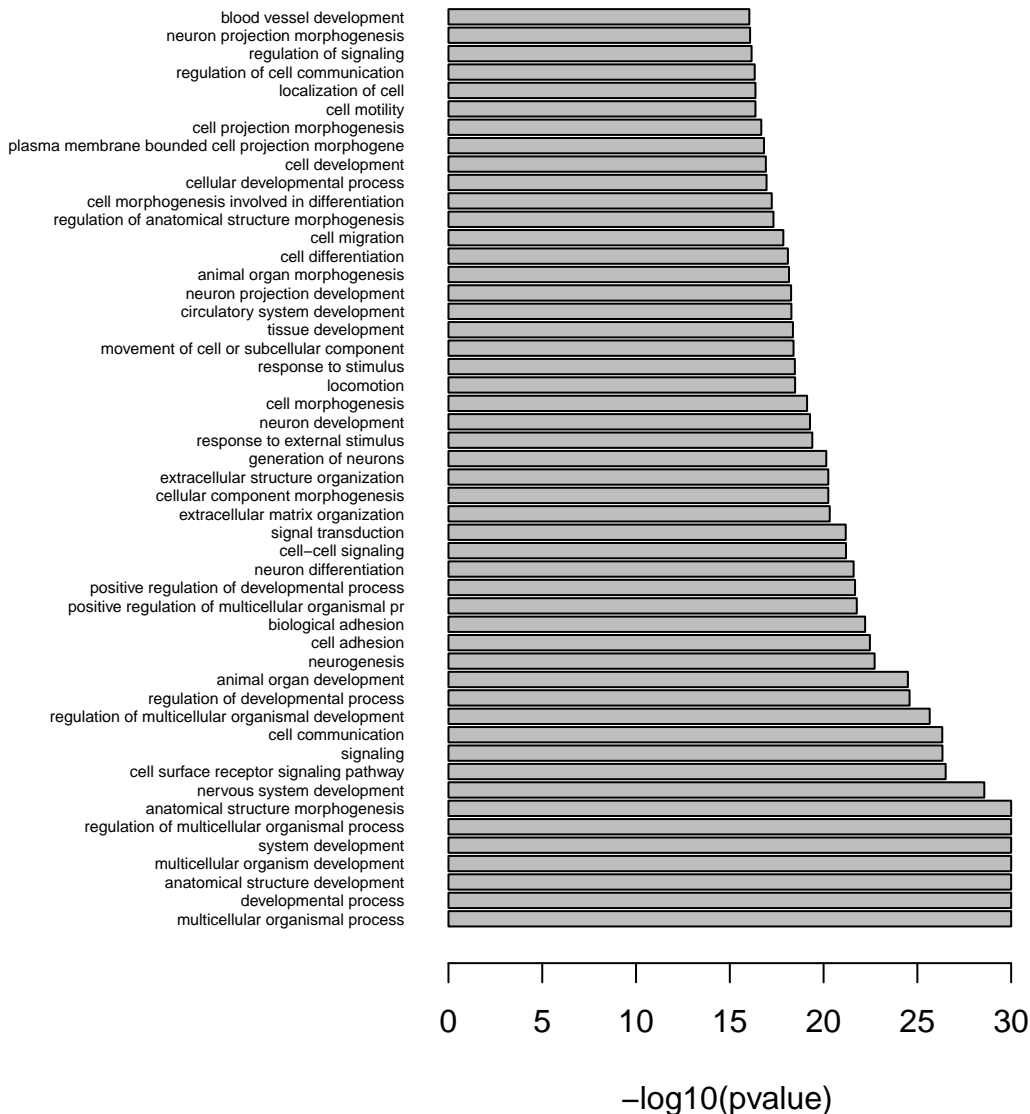

Supplement: Supplementary file 28 [file 14332325]

CP\_enrichGO\_BP

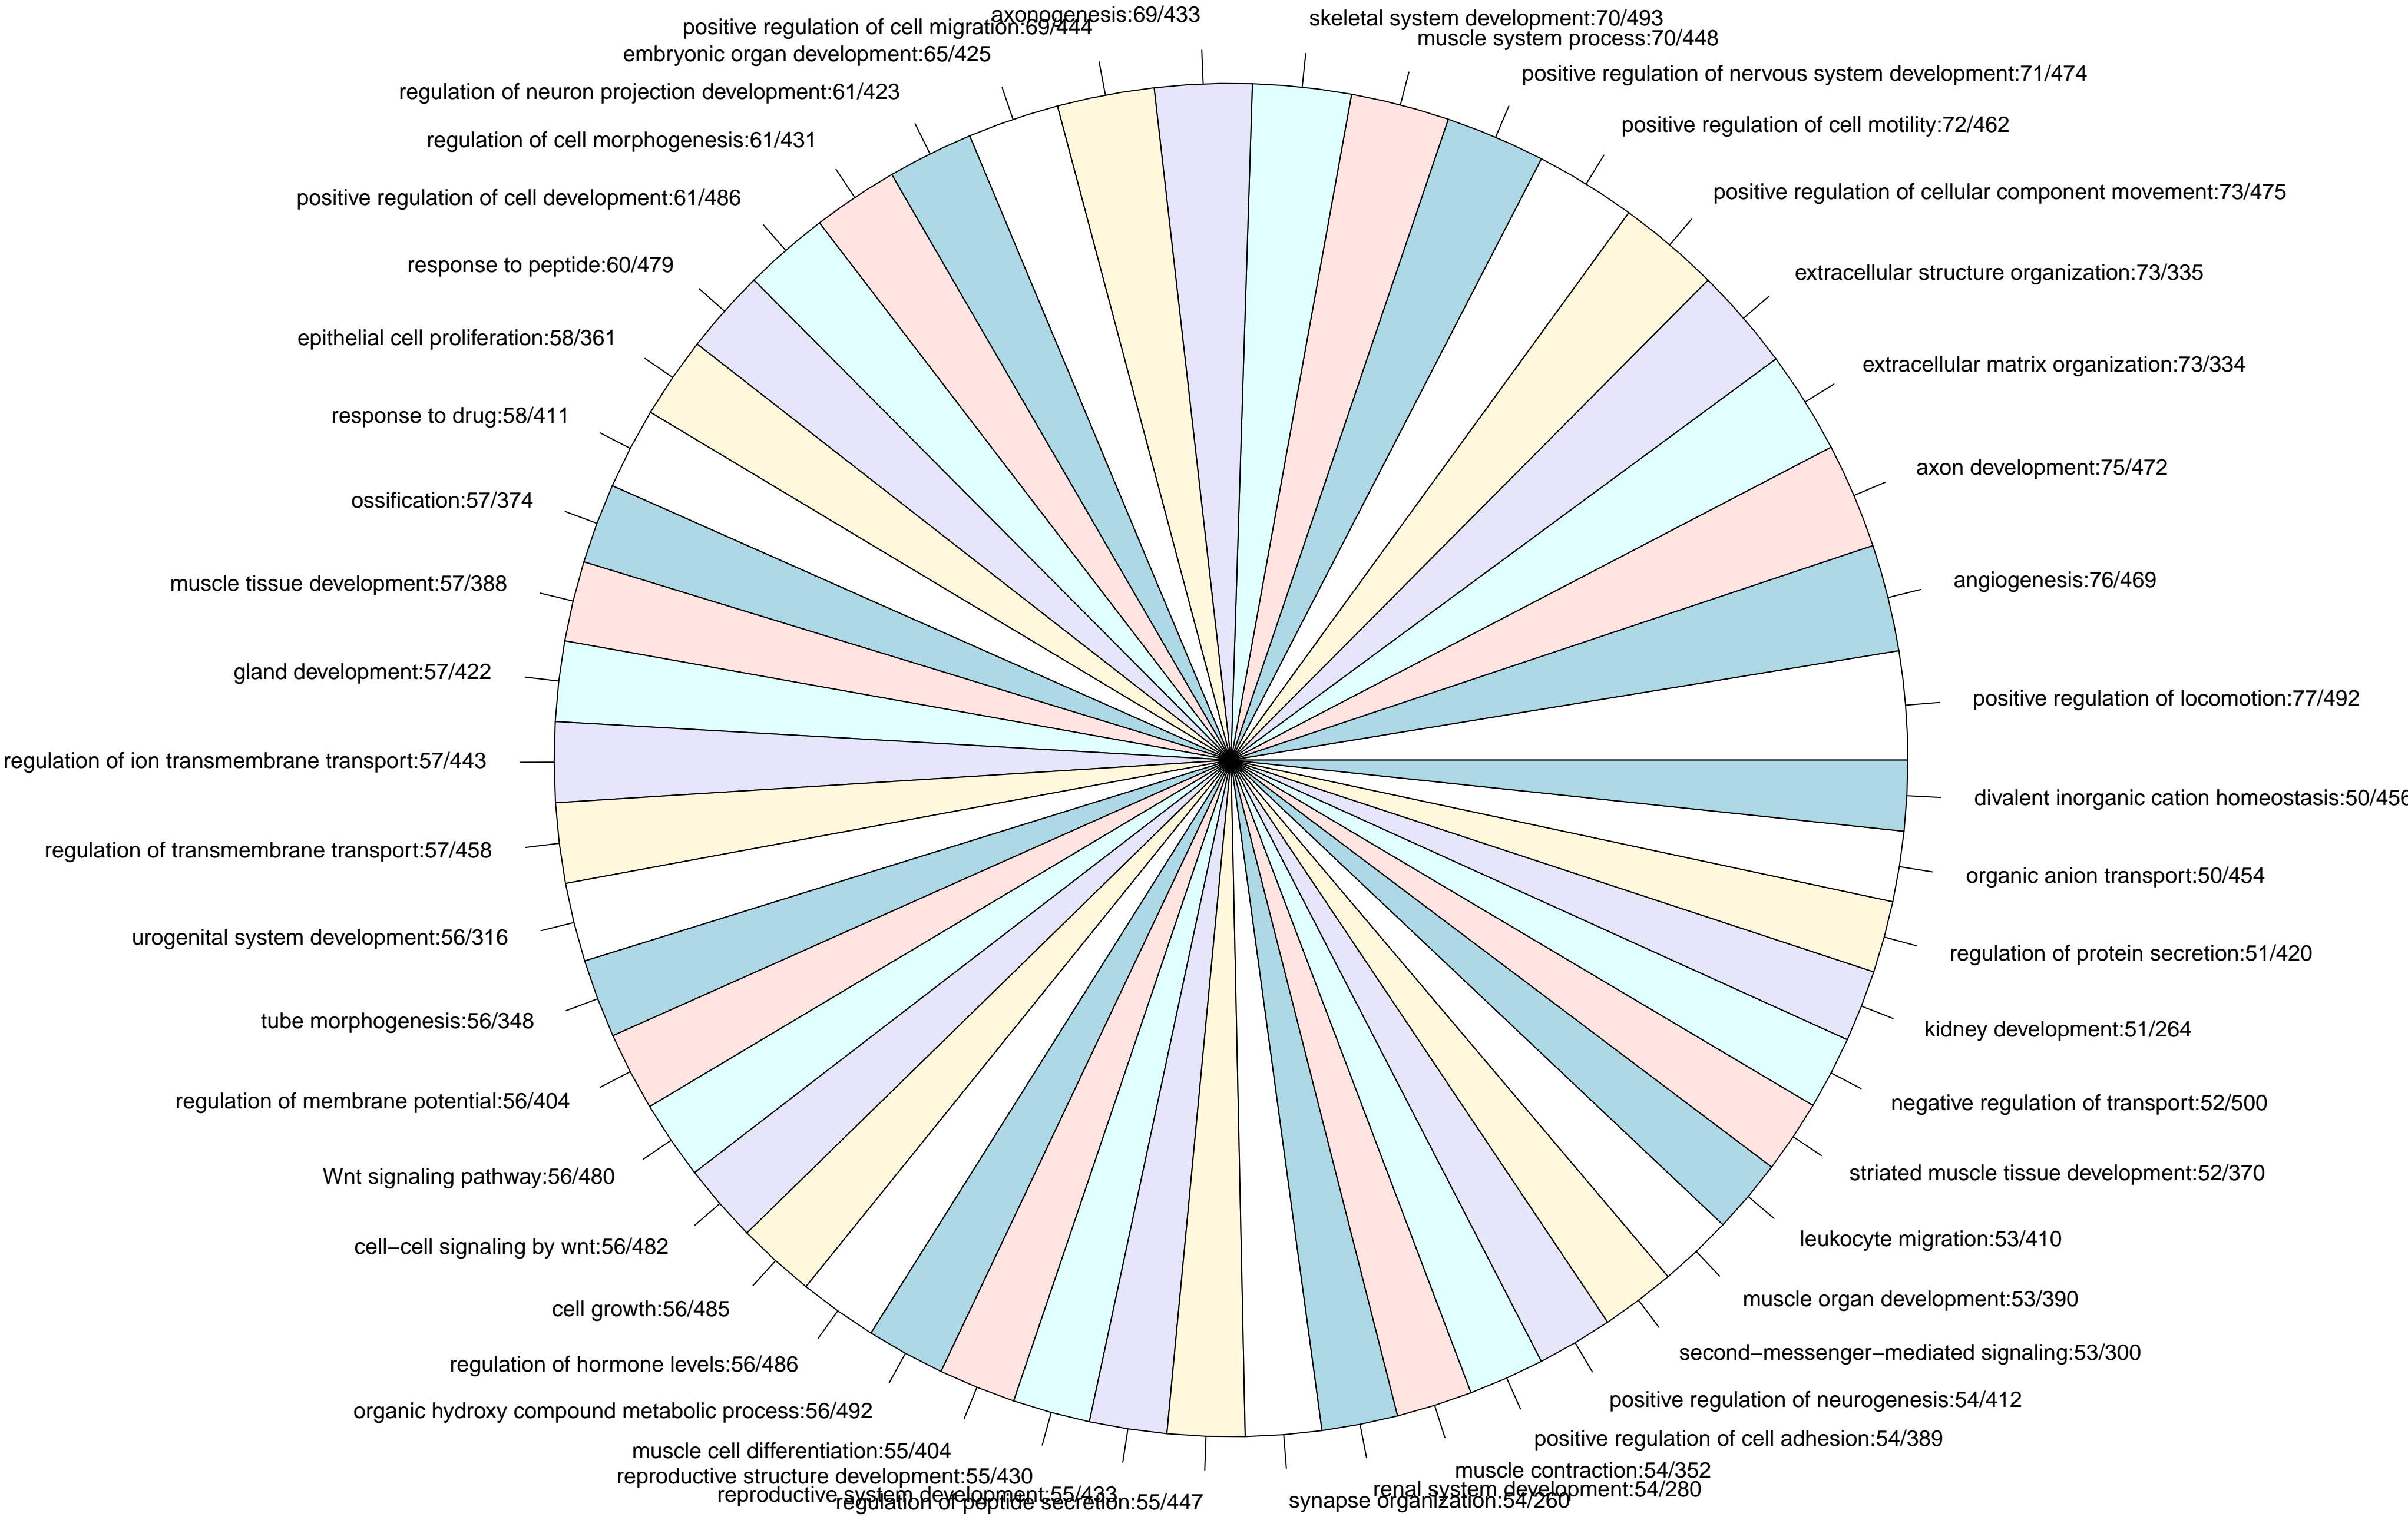

Supplement: Supplementary file 29 [file 14332325]

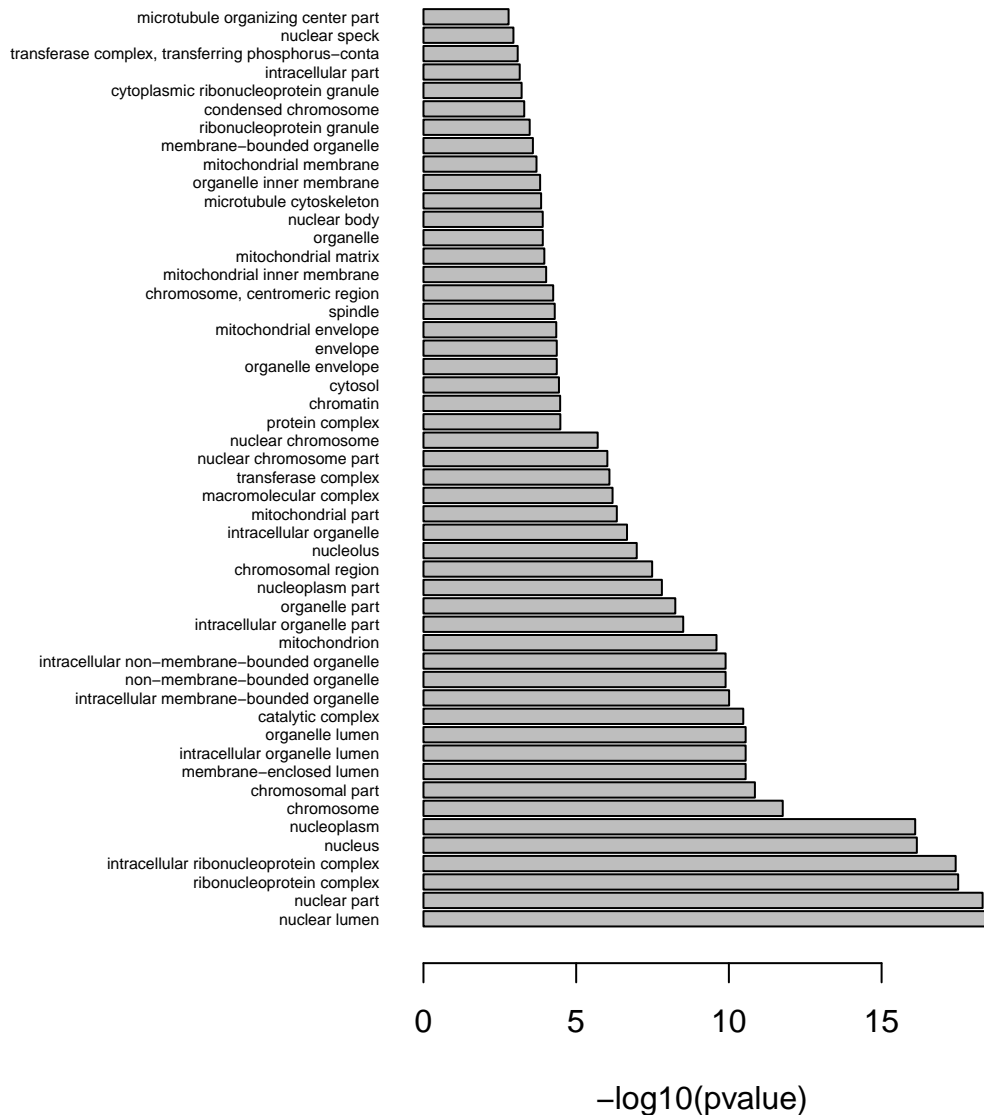

Supplement: Supplementary file 31 [file 14332325]

GOstats\_kegg\_Under

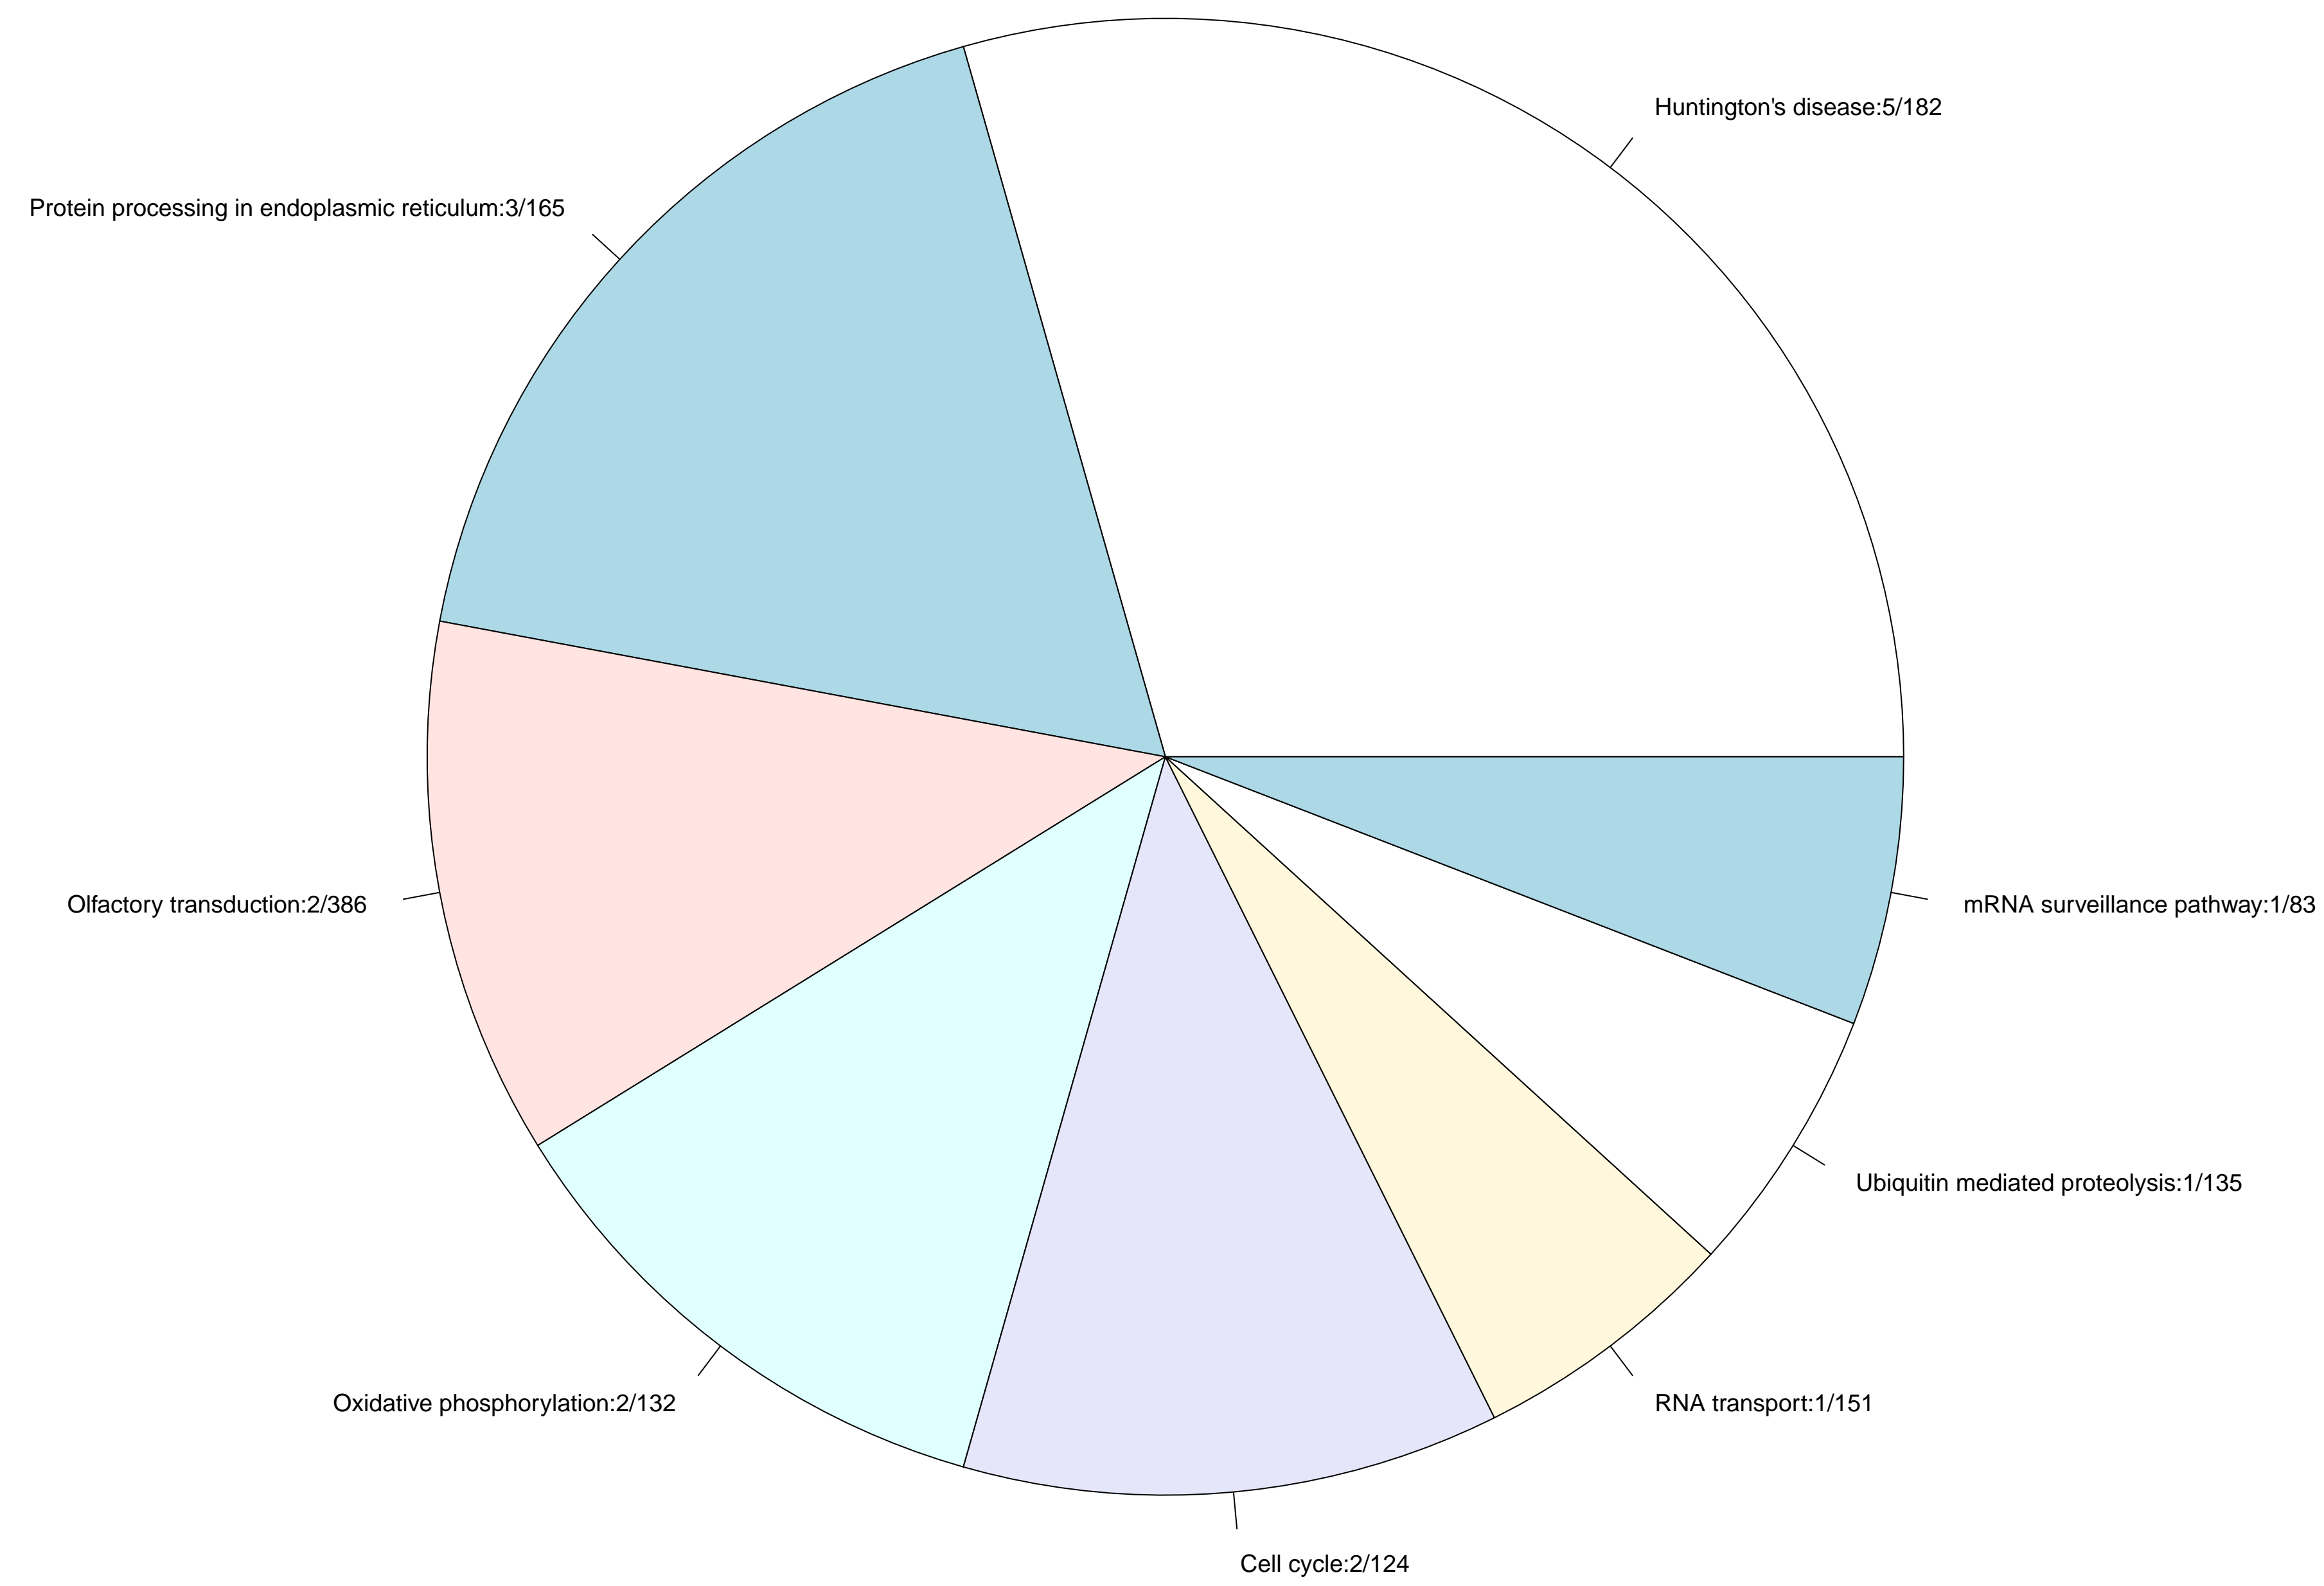

Supplement: Supplementary file 32 [file 14332325]

topGO\_CC\_elimfisher\_pieChart

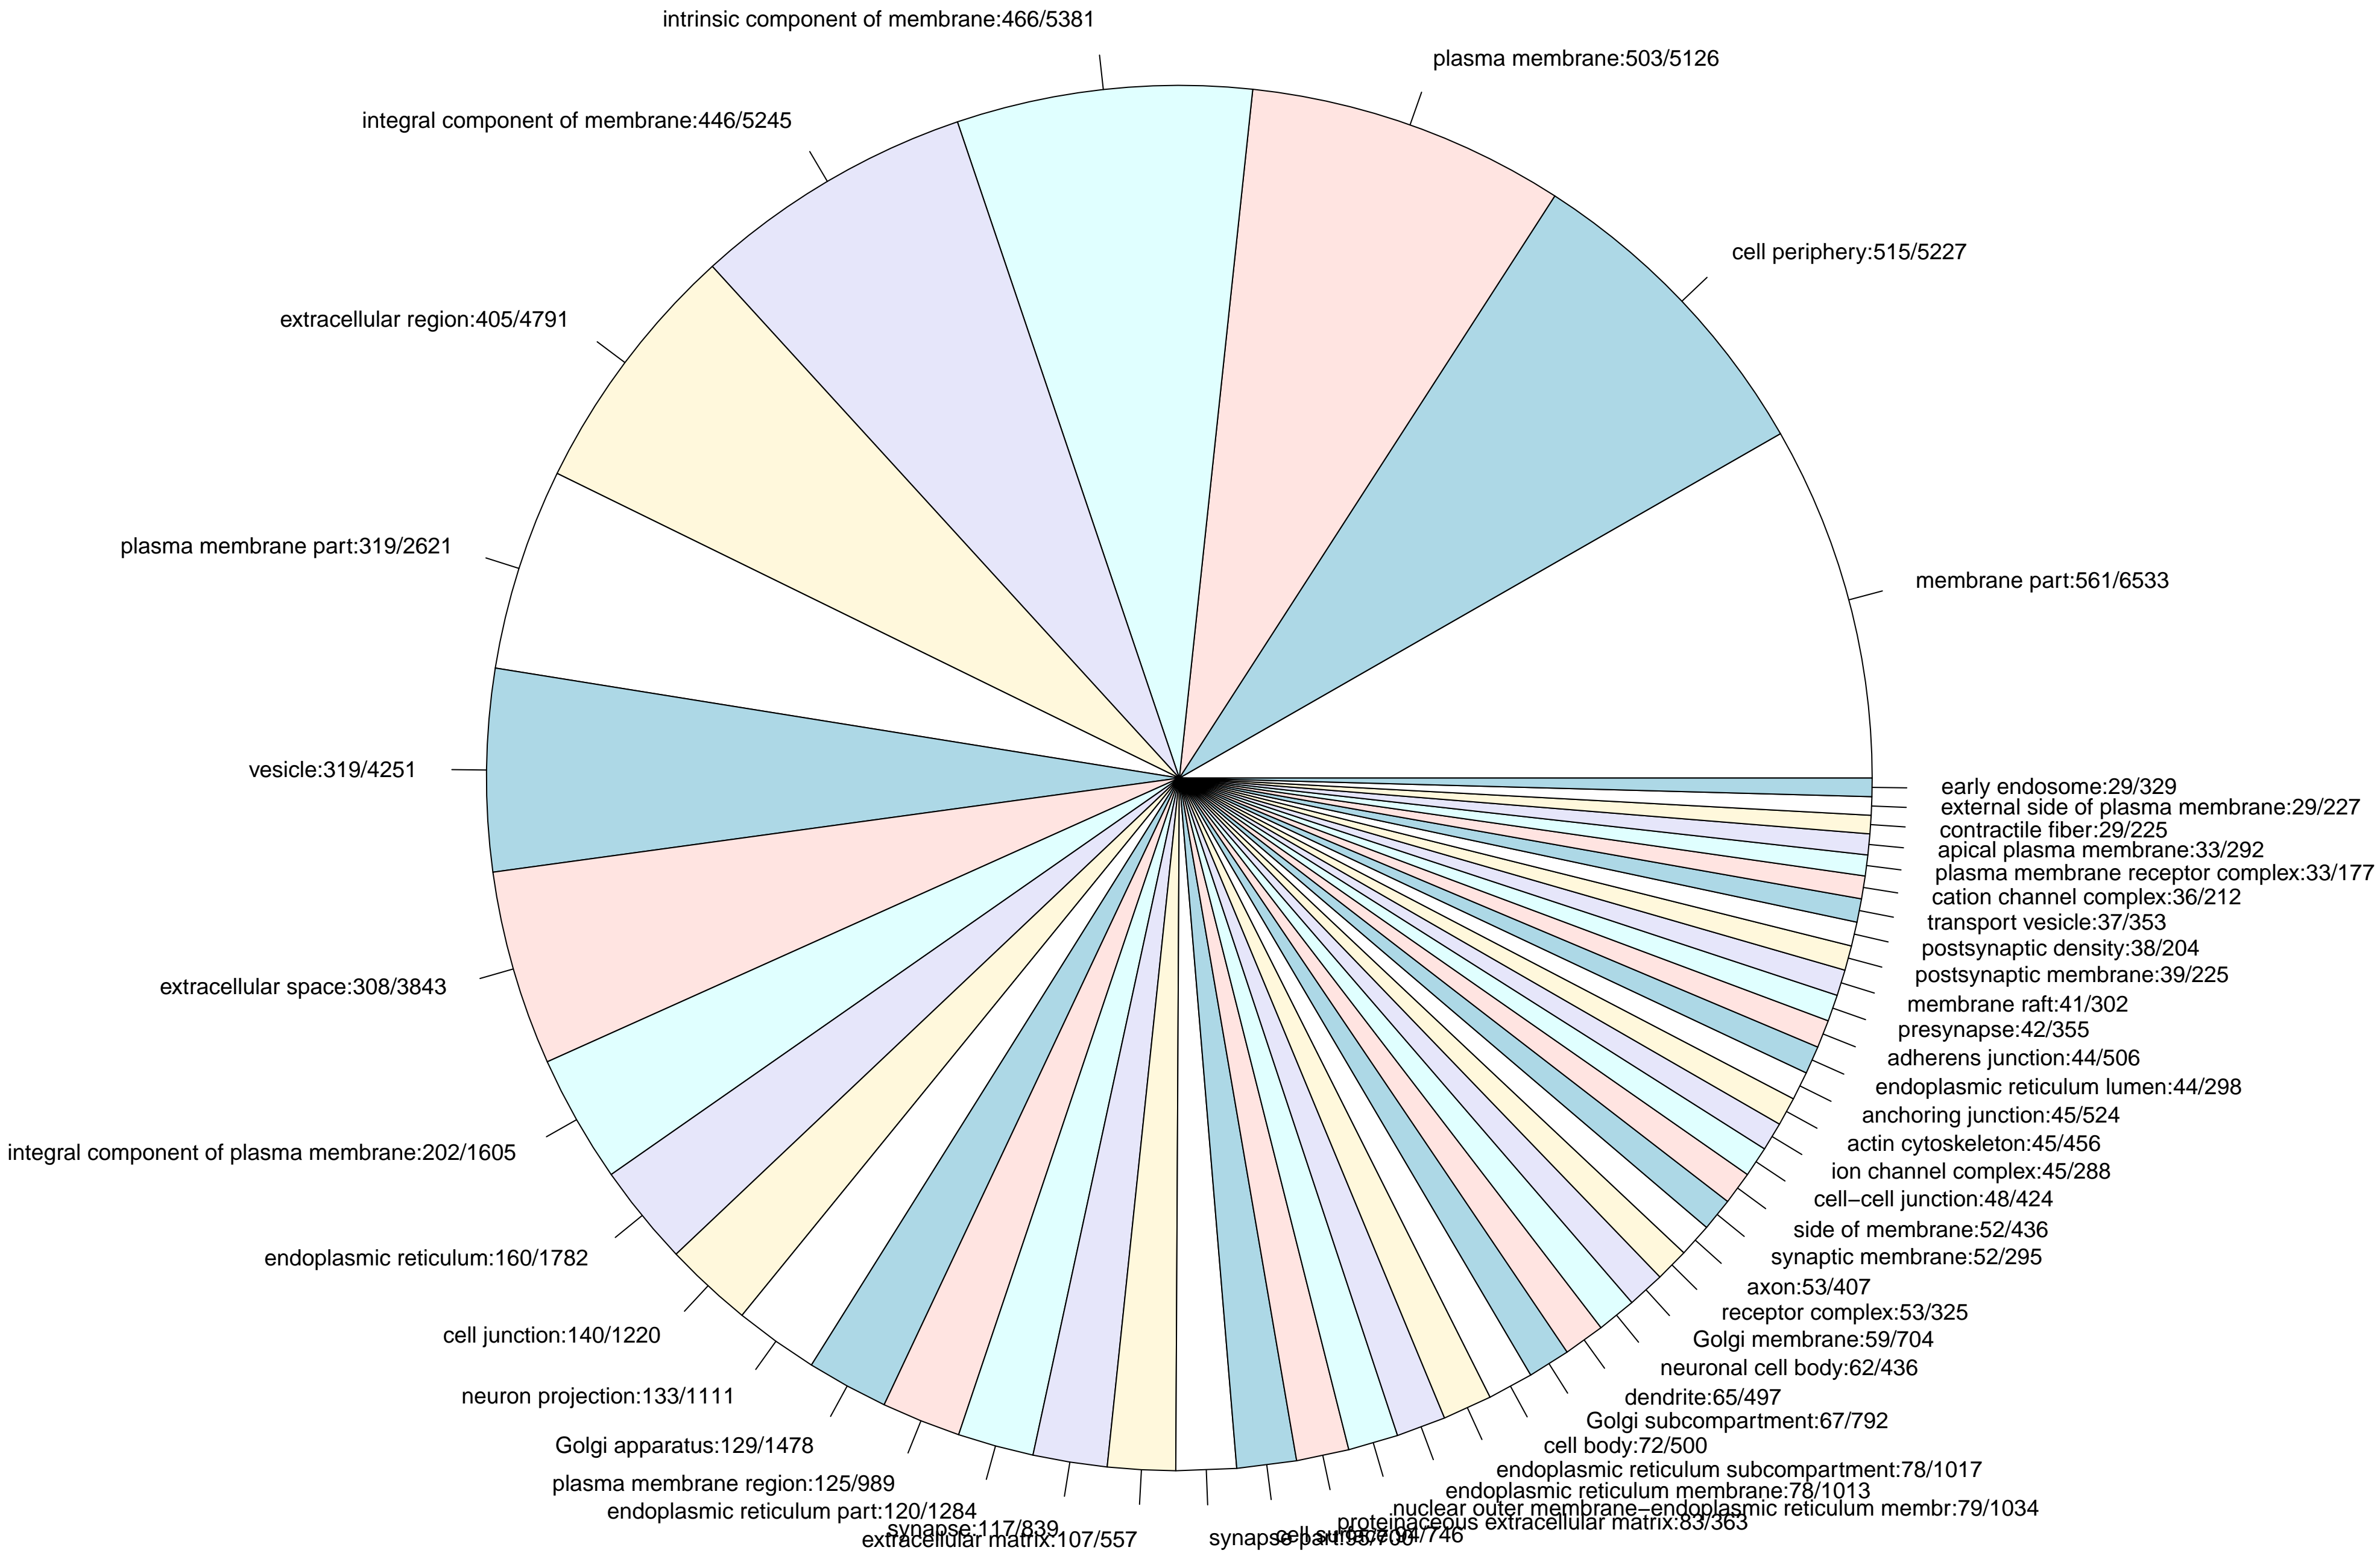

Supplement: Supplementary file 33 [file 14332325]

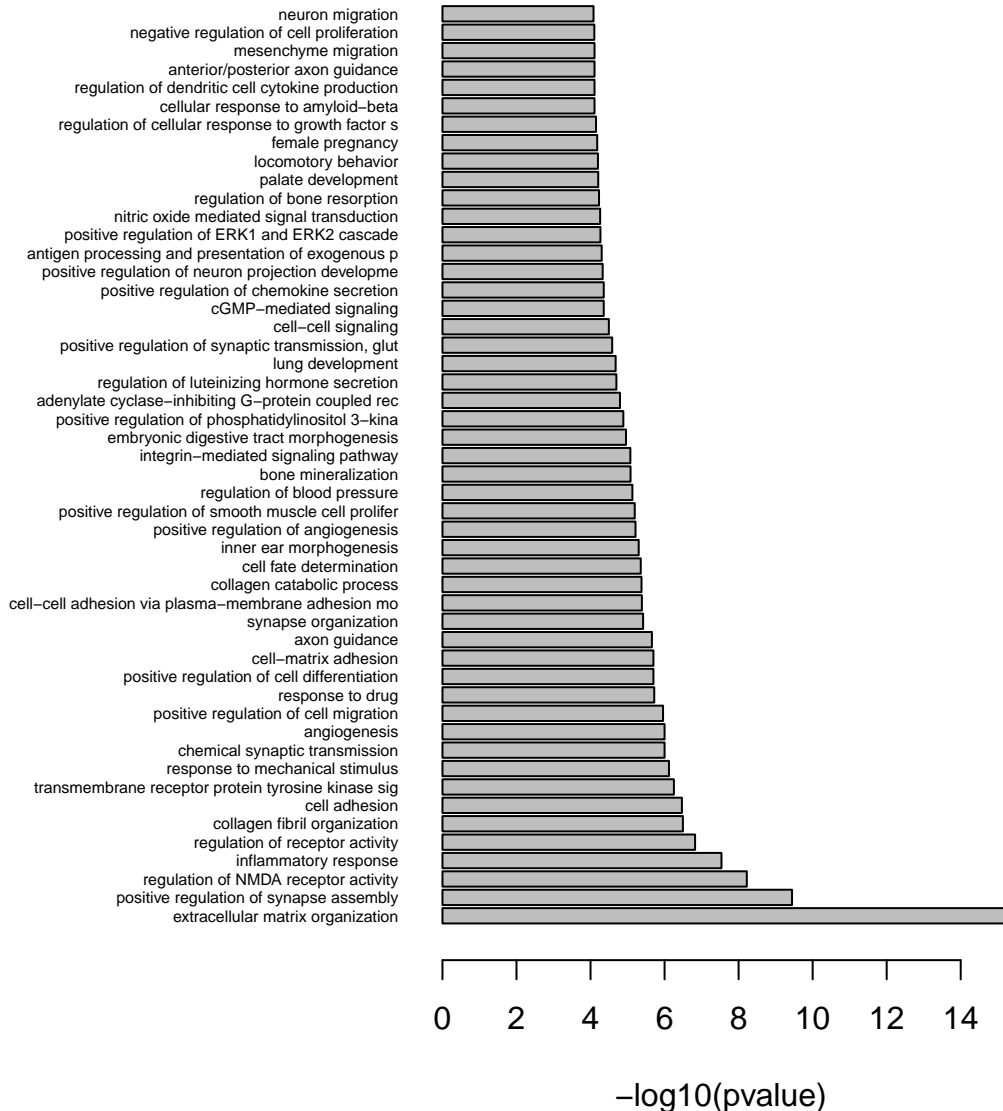

Supplement: Supplementary file 34 [file 14332325]

### GOstats\_CC\_Down\_pieChart

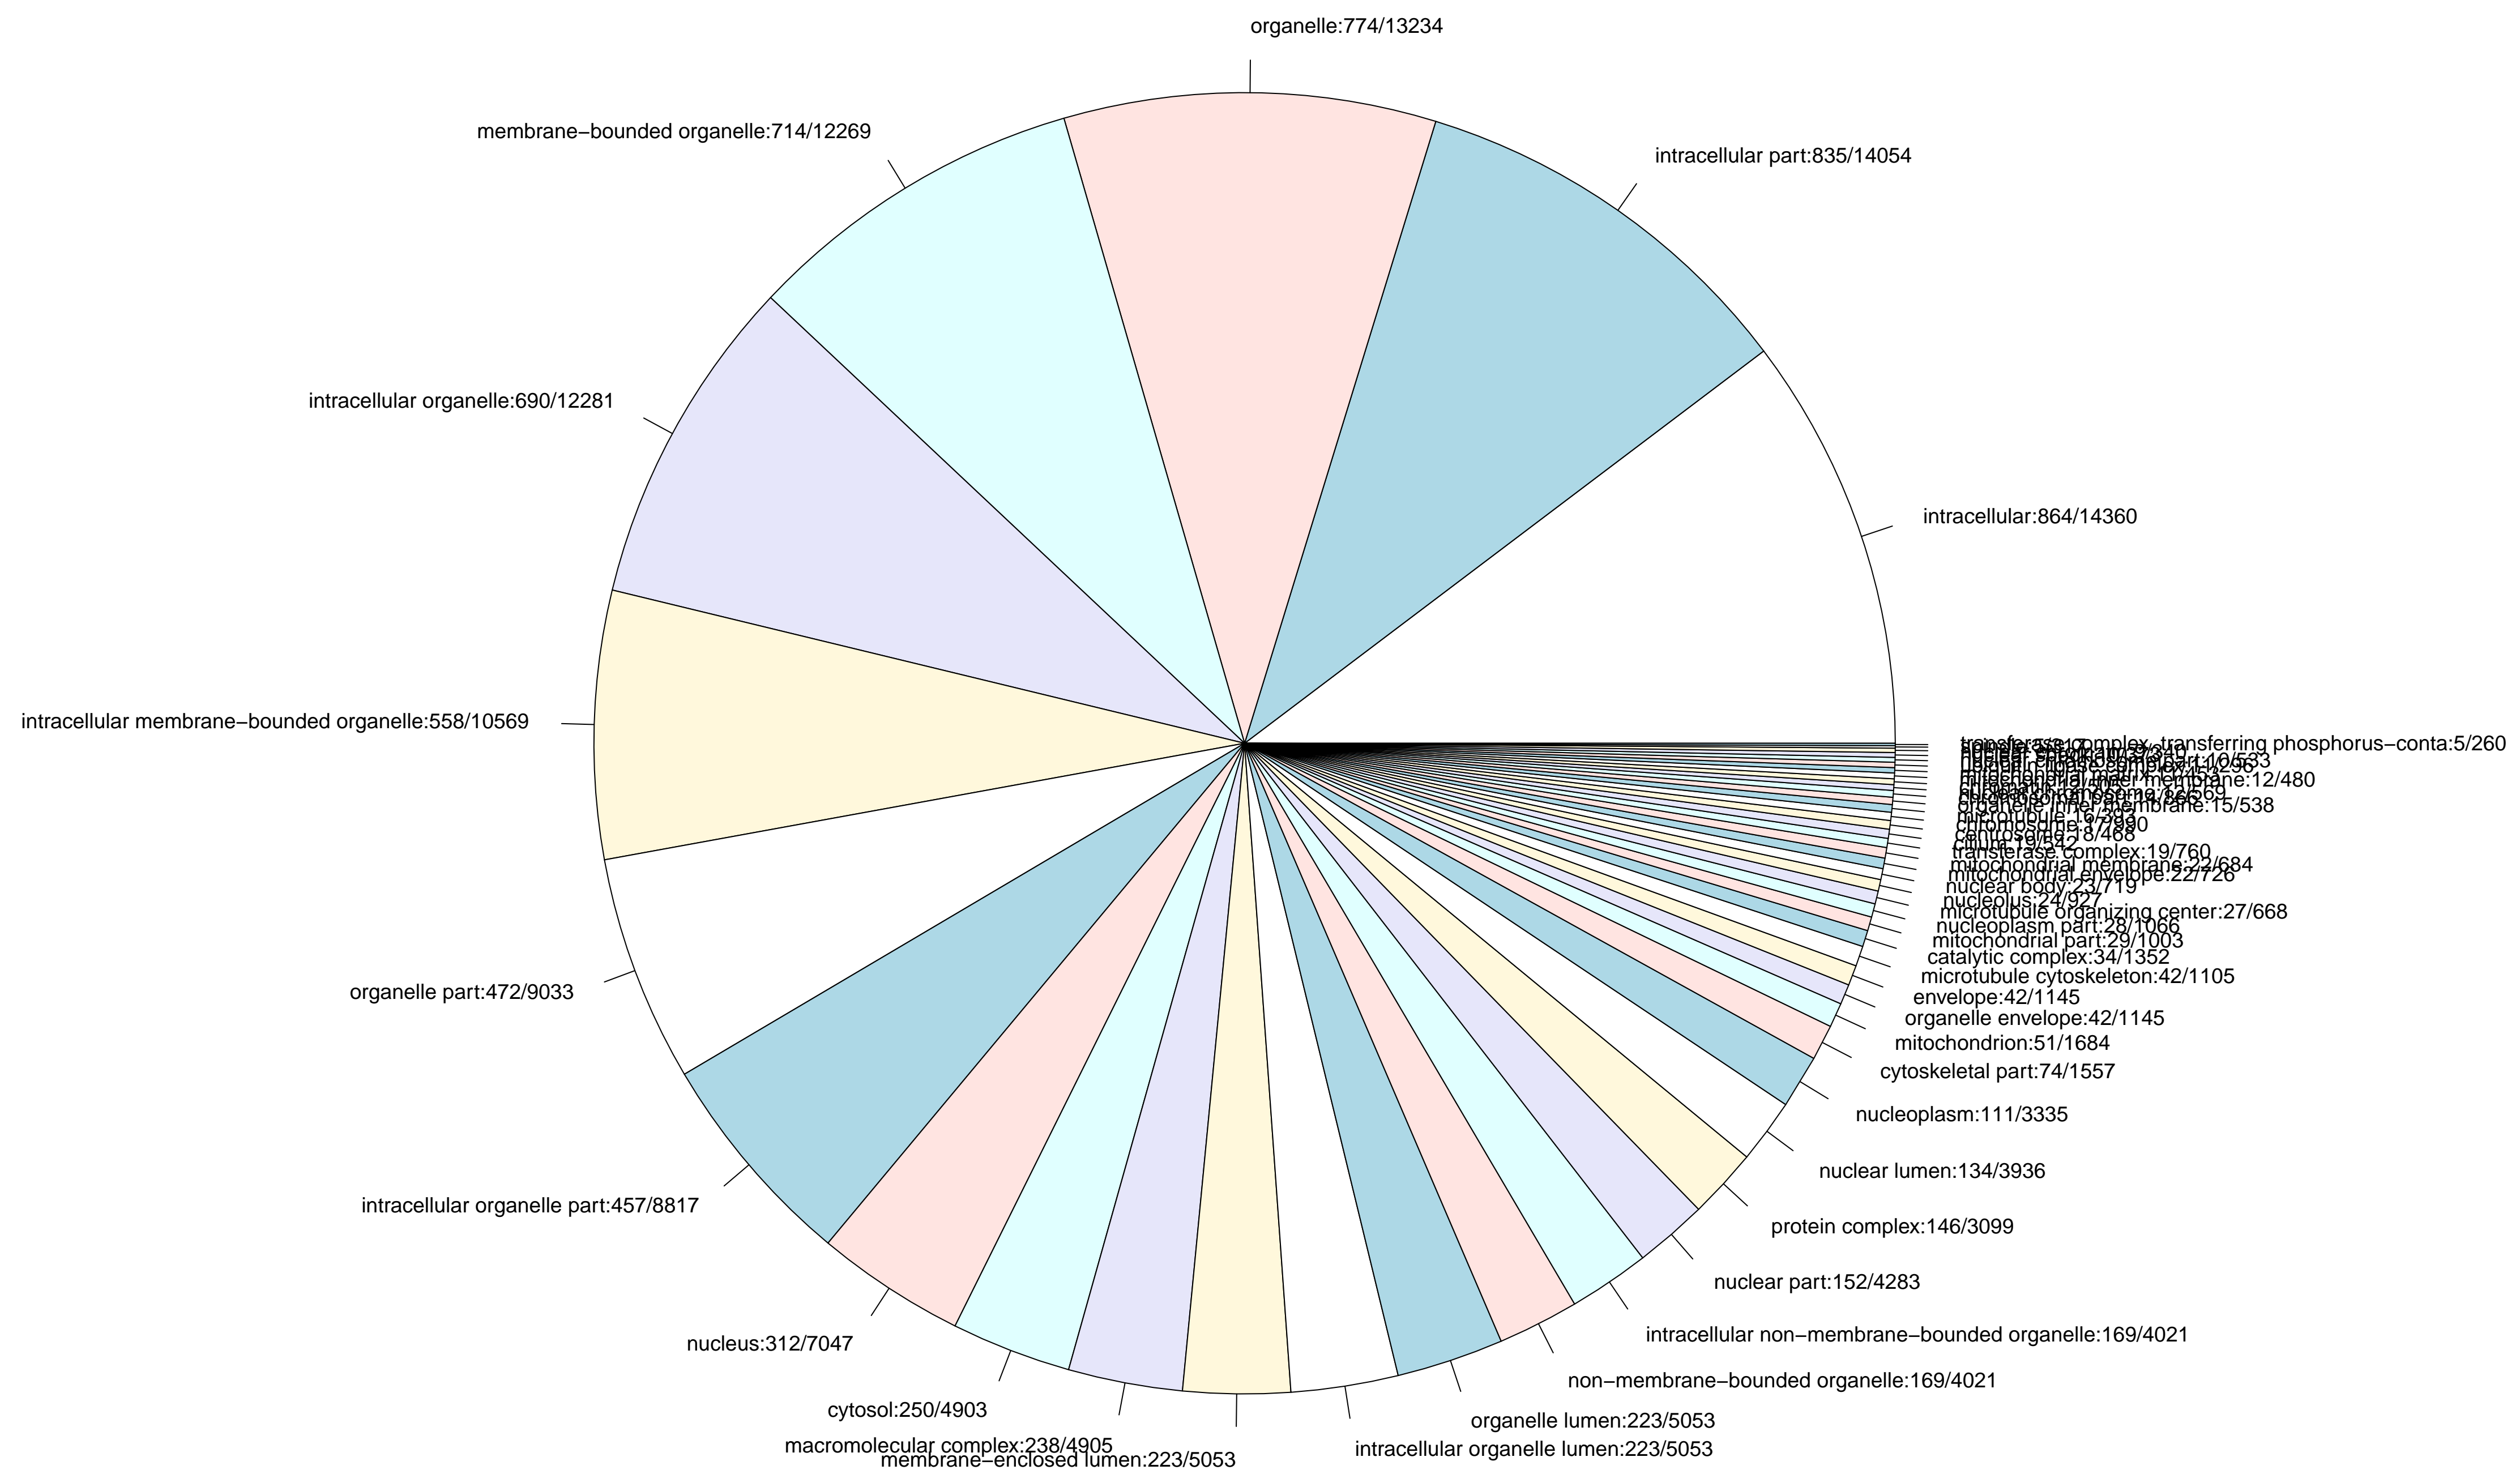

Supplement: Supplementary file 35 [file 14332325]

CP\_enrichGO\_CC

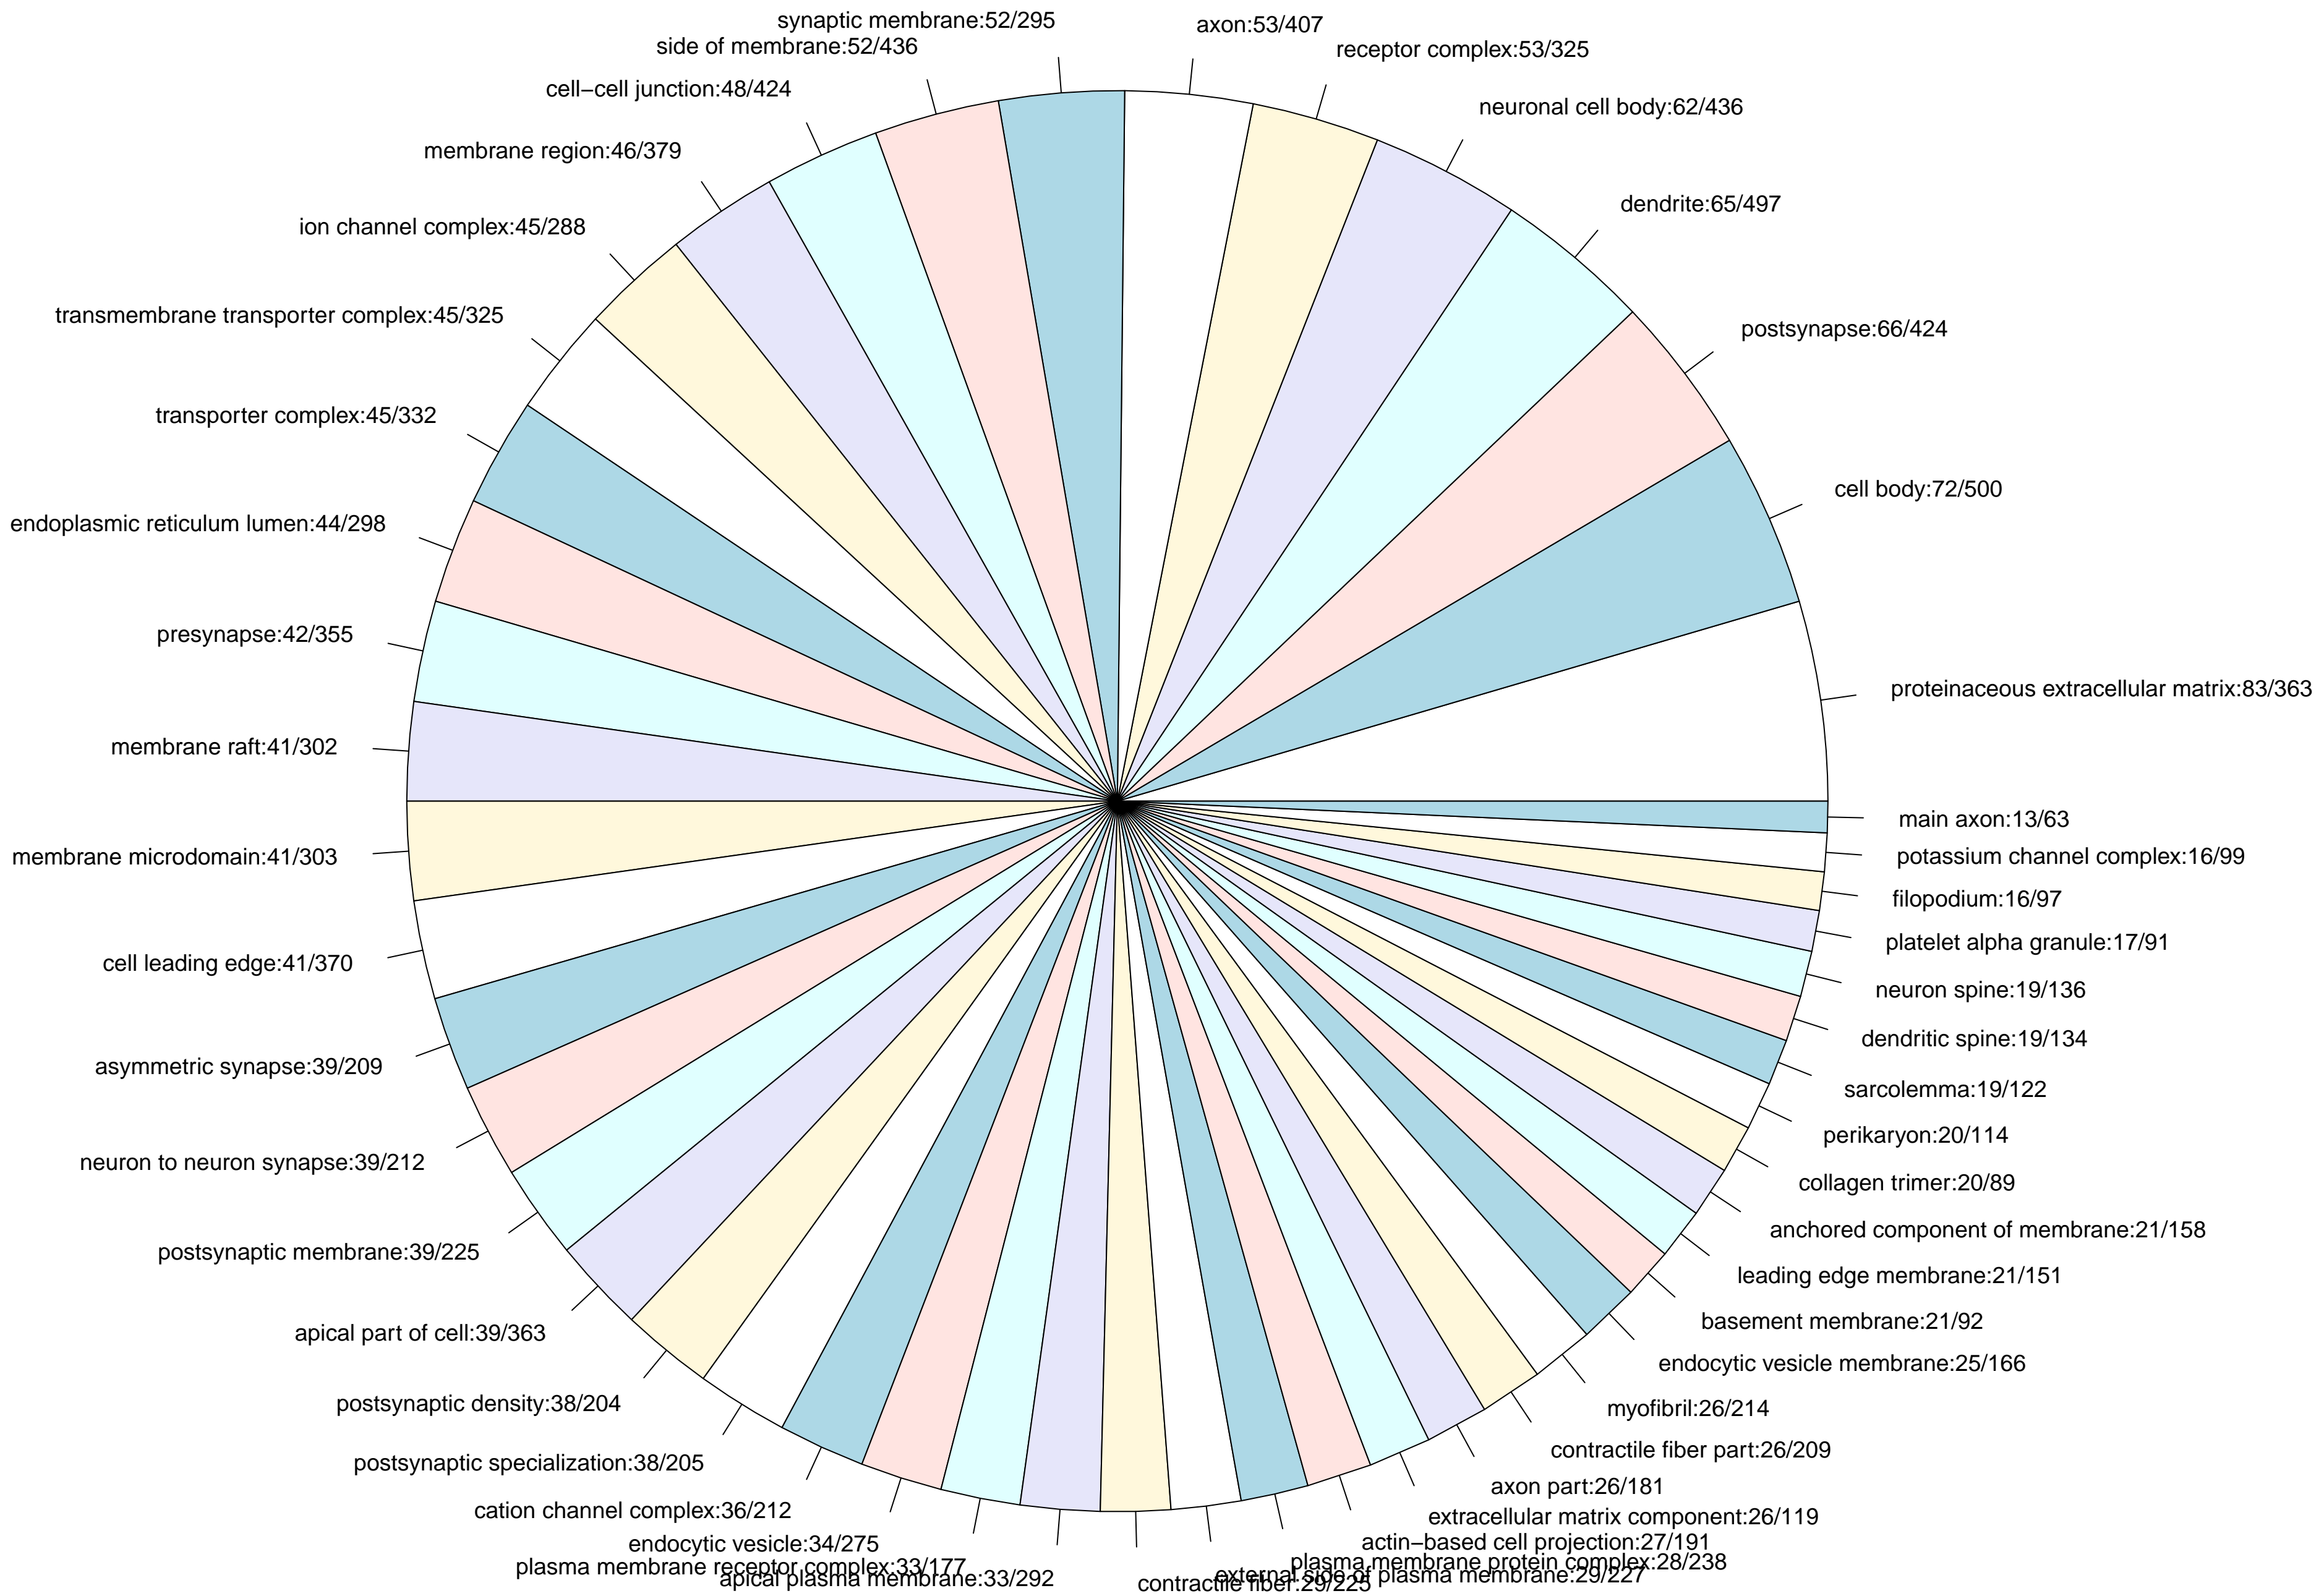

Supplement: Supplementary file 36 [file 14332325]

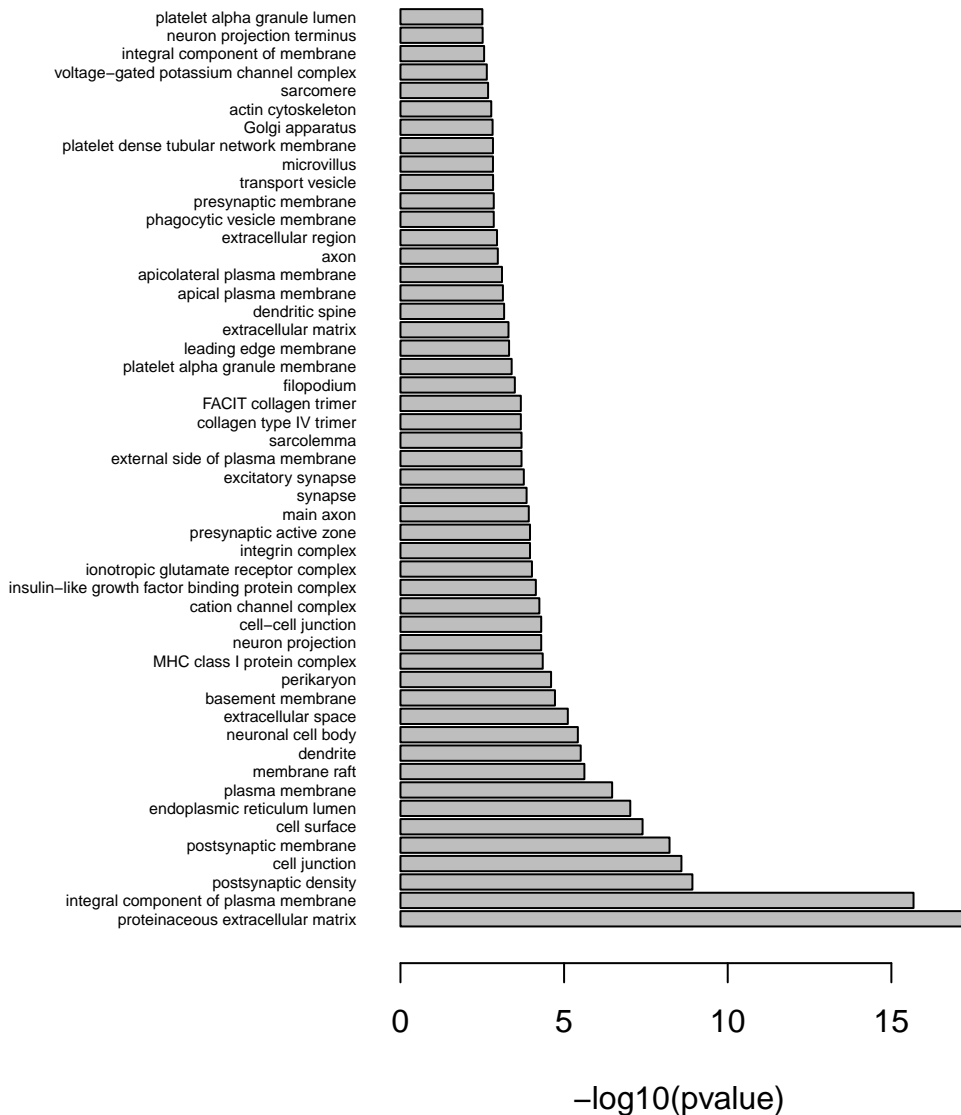

Supplement: Supplementary file 37 [file 14332325]

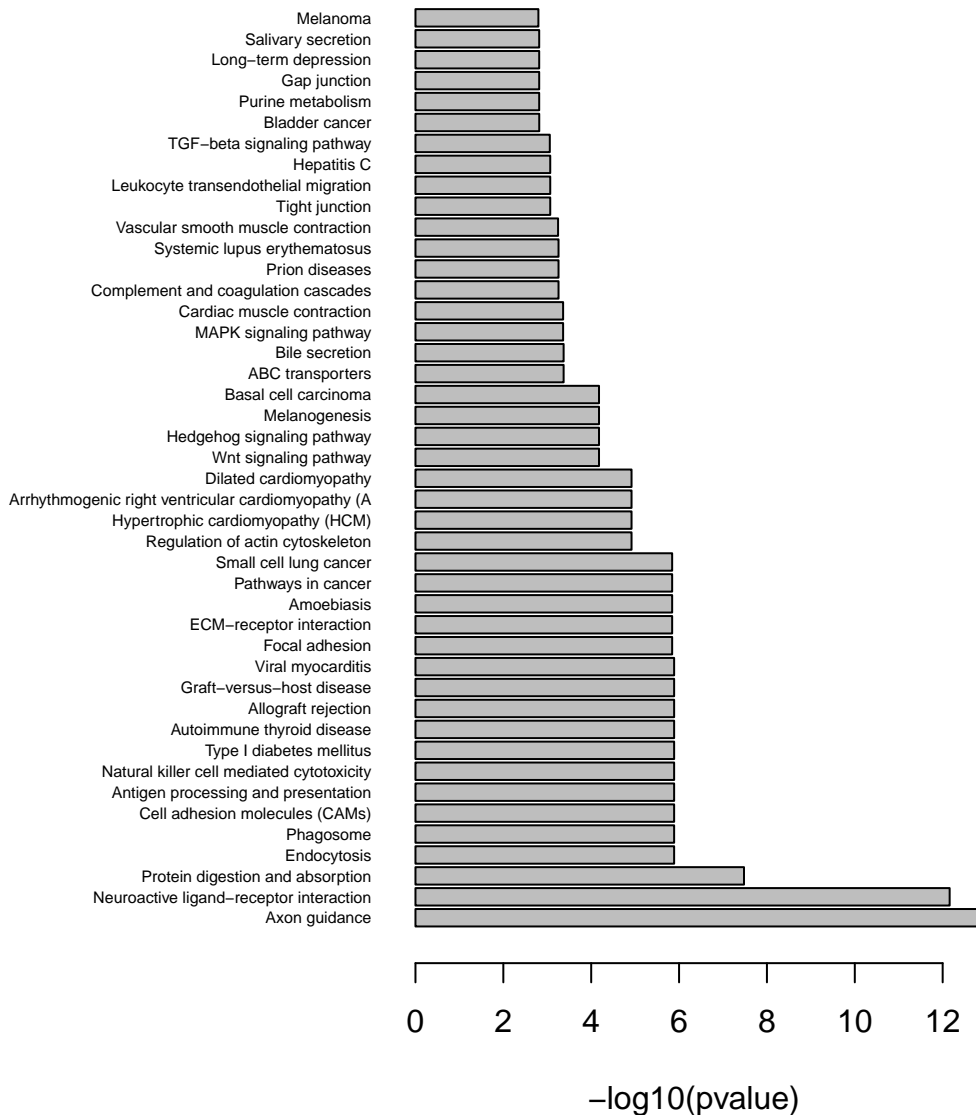

Supplement: Supplementary file 38 [file 14332325]

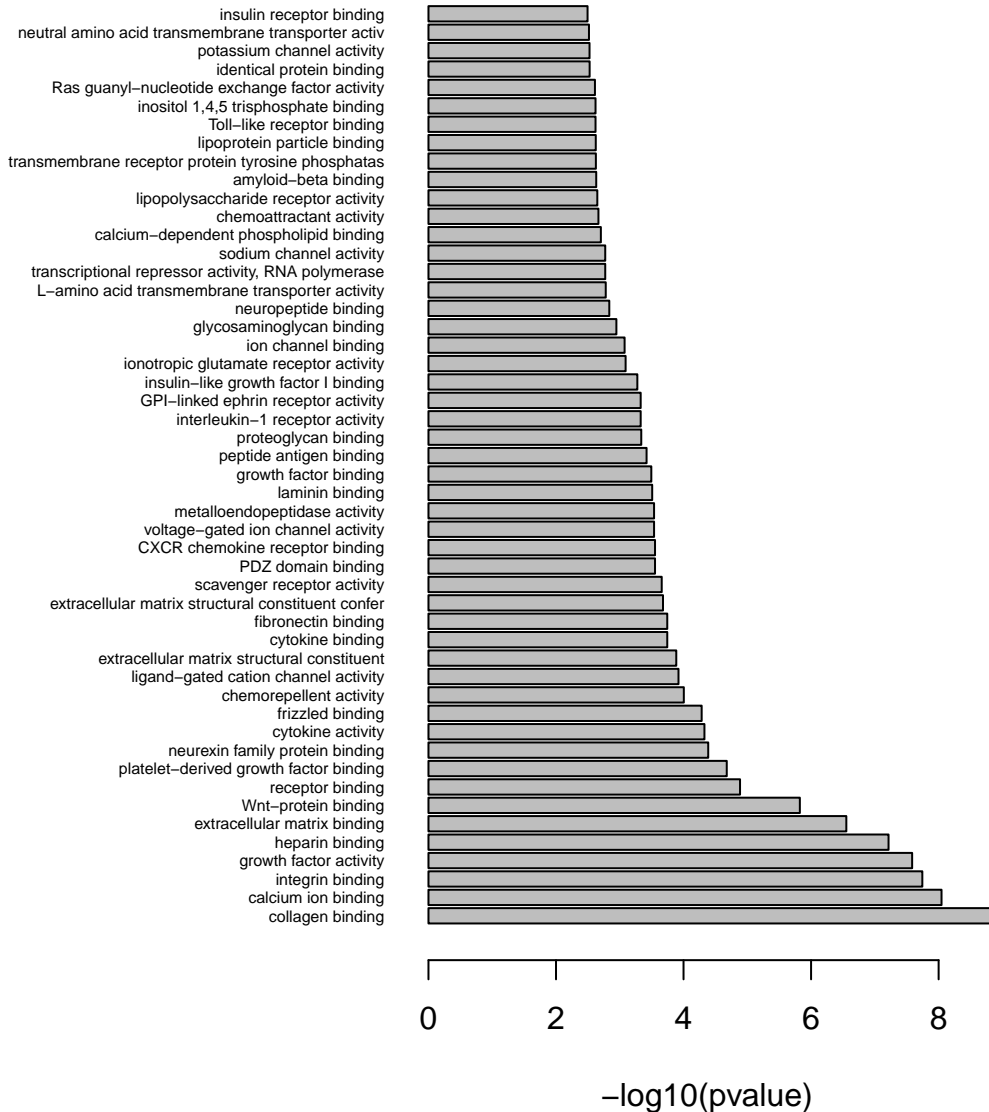

Supplement: Supplementary file 39 [file 14332325]

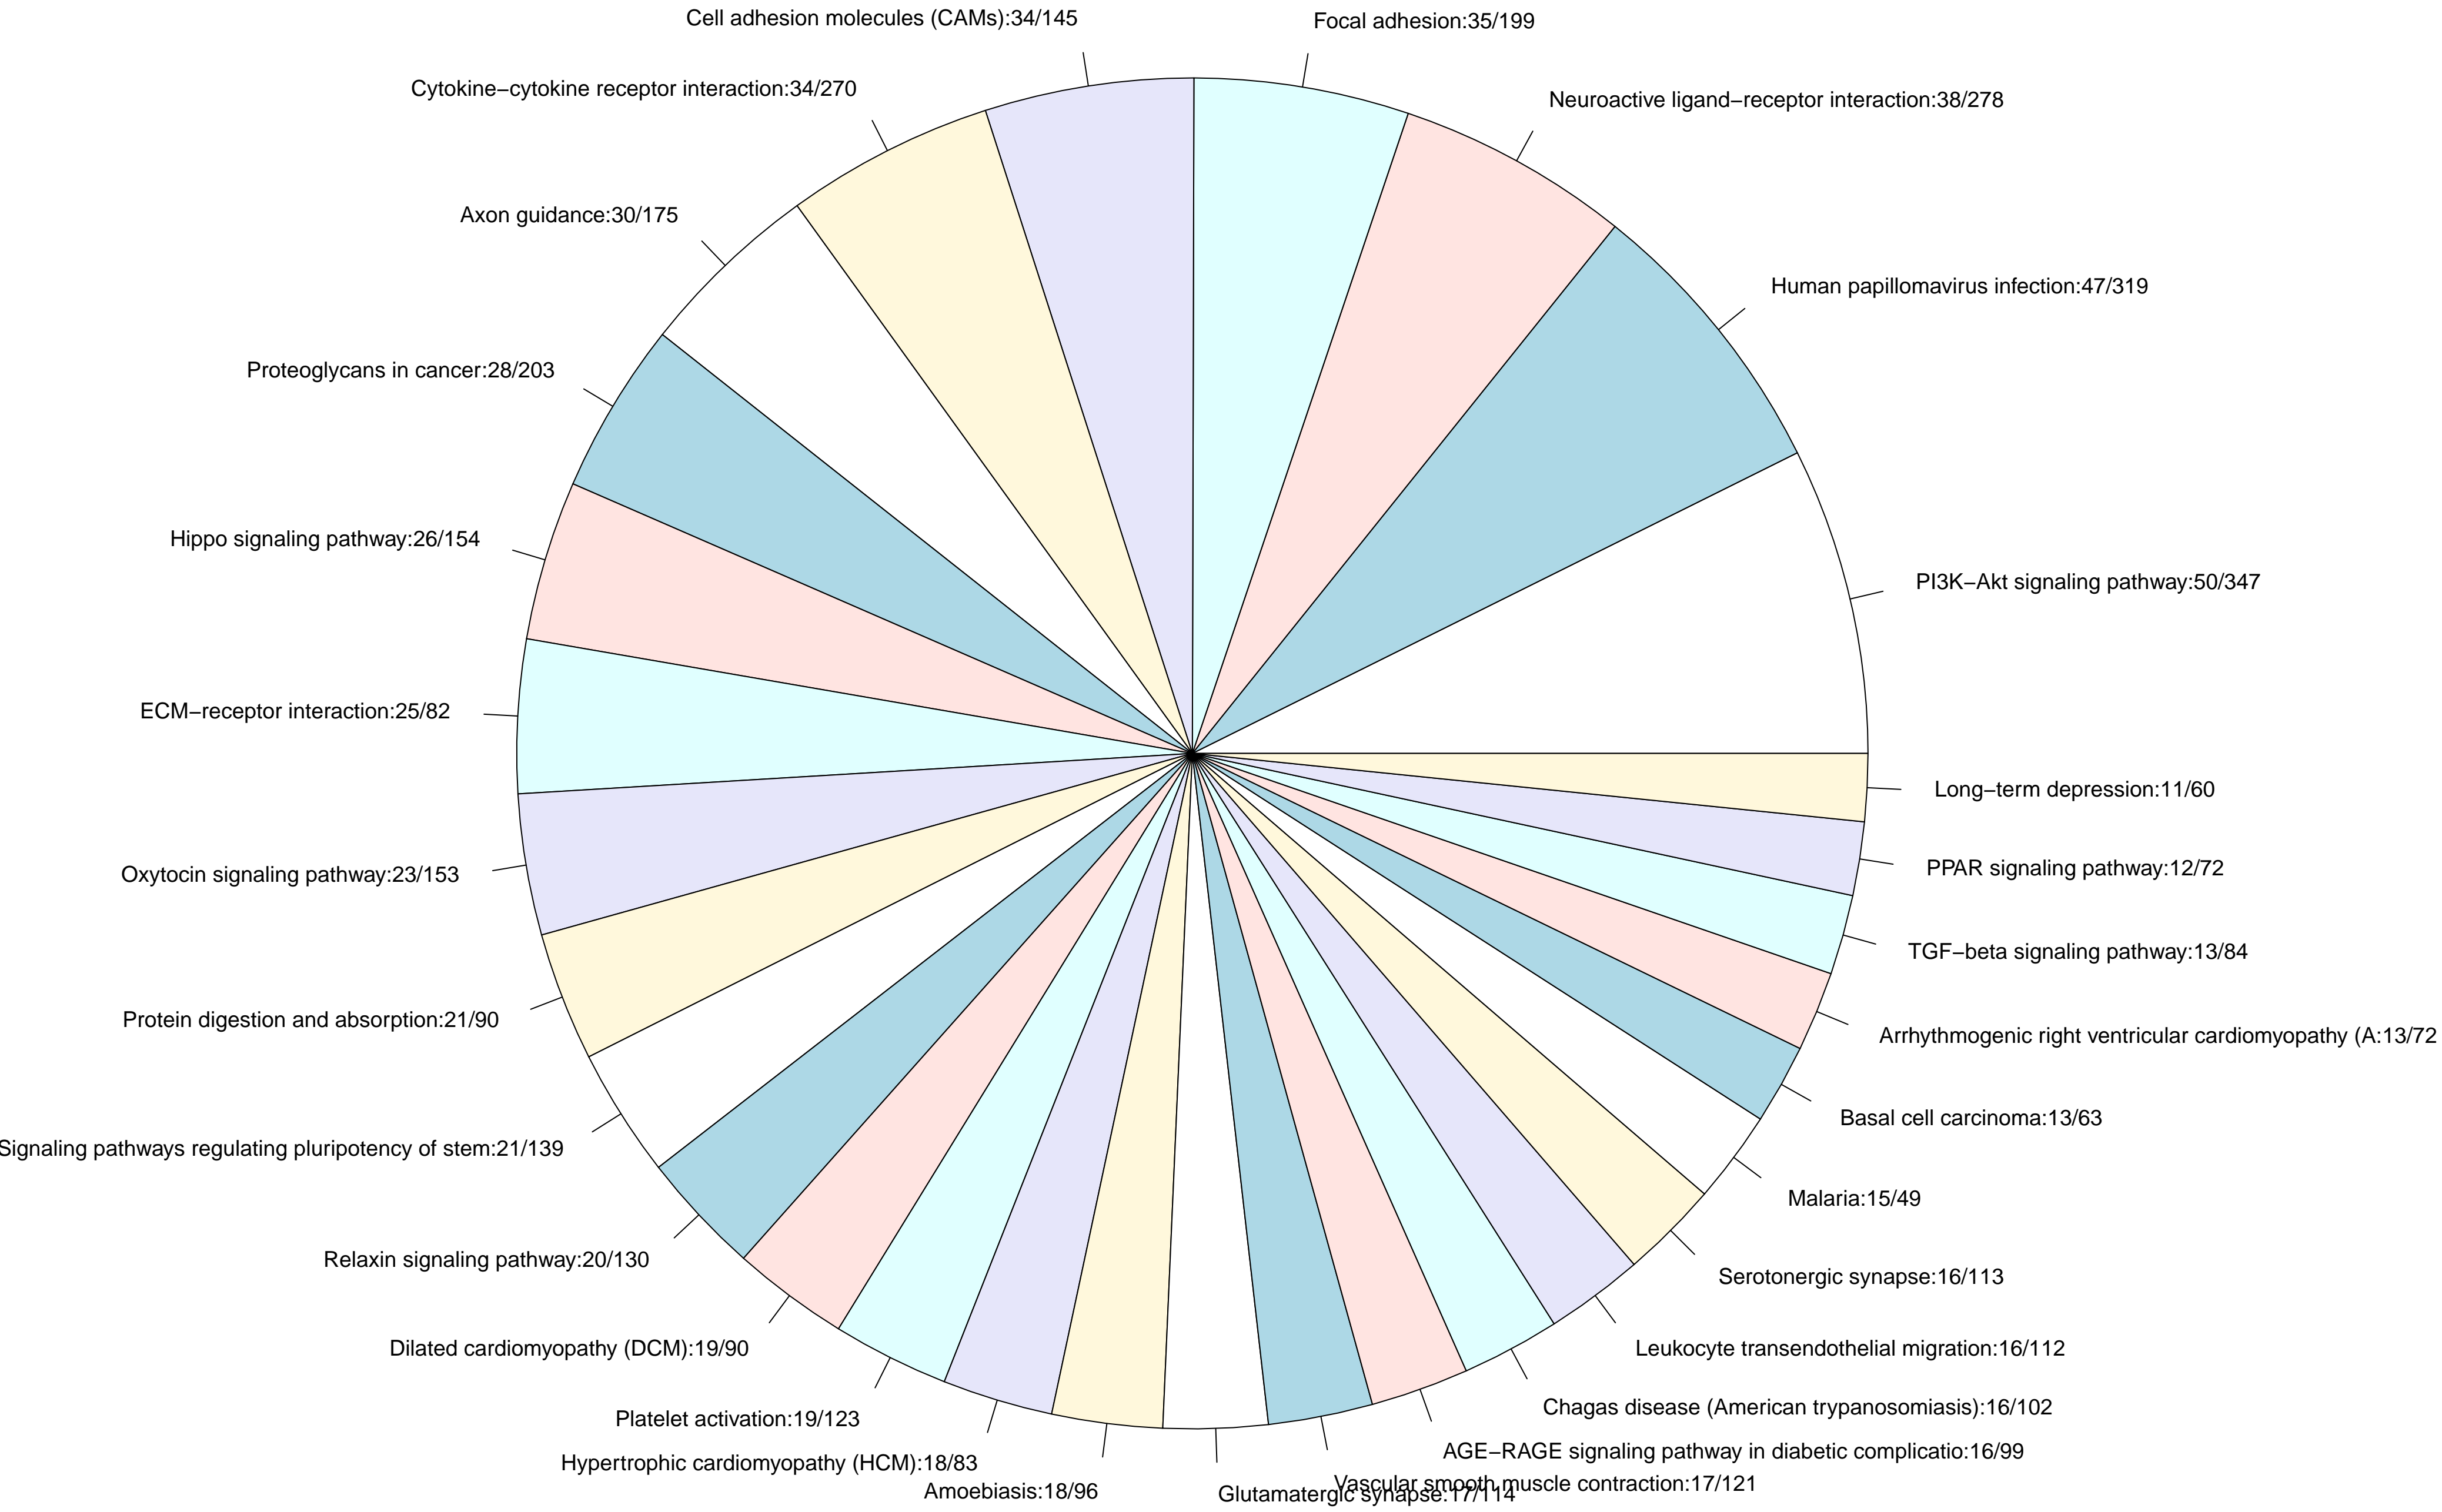

Supplement: Supplementary file 40 [file 14332325]

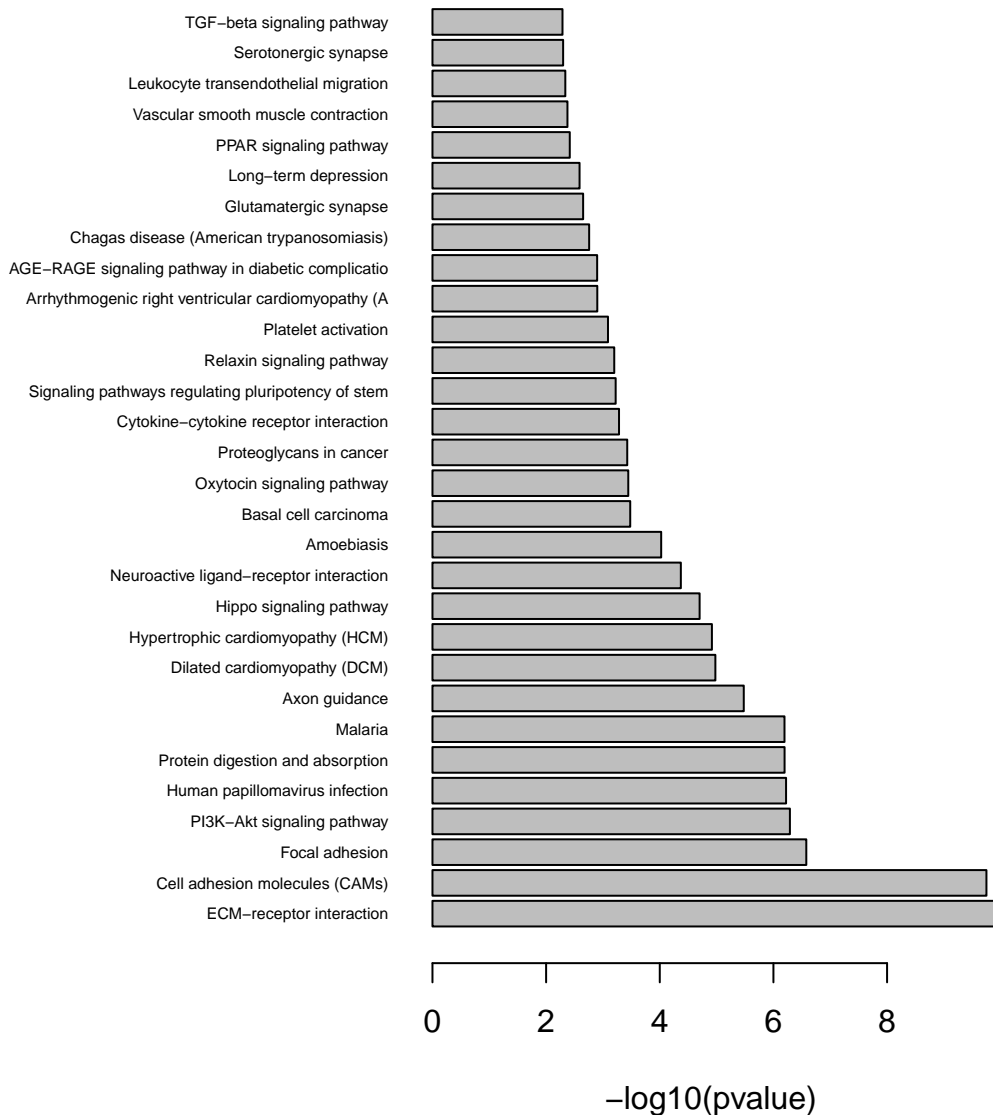

Supplement: Supplementary file 41 [file 14332325]

GOstats\_CC\_Up\_pieChart



Supplement: Supplementary file 42 [file 14332325]

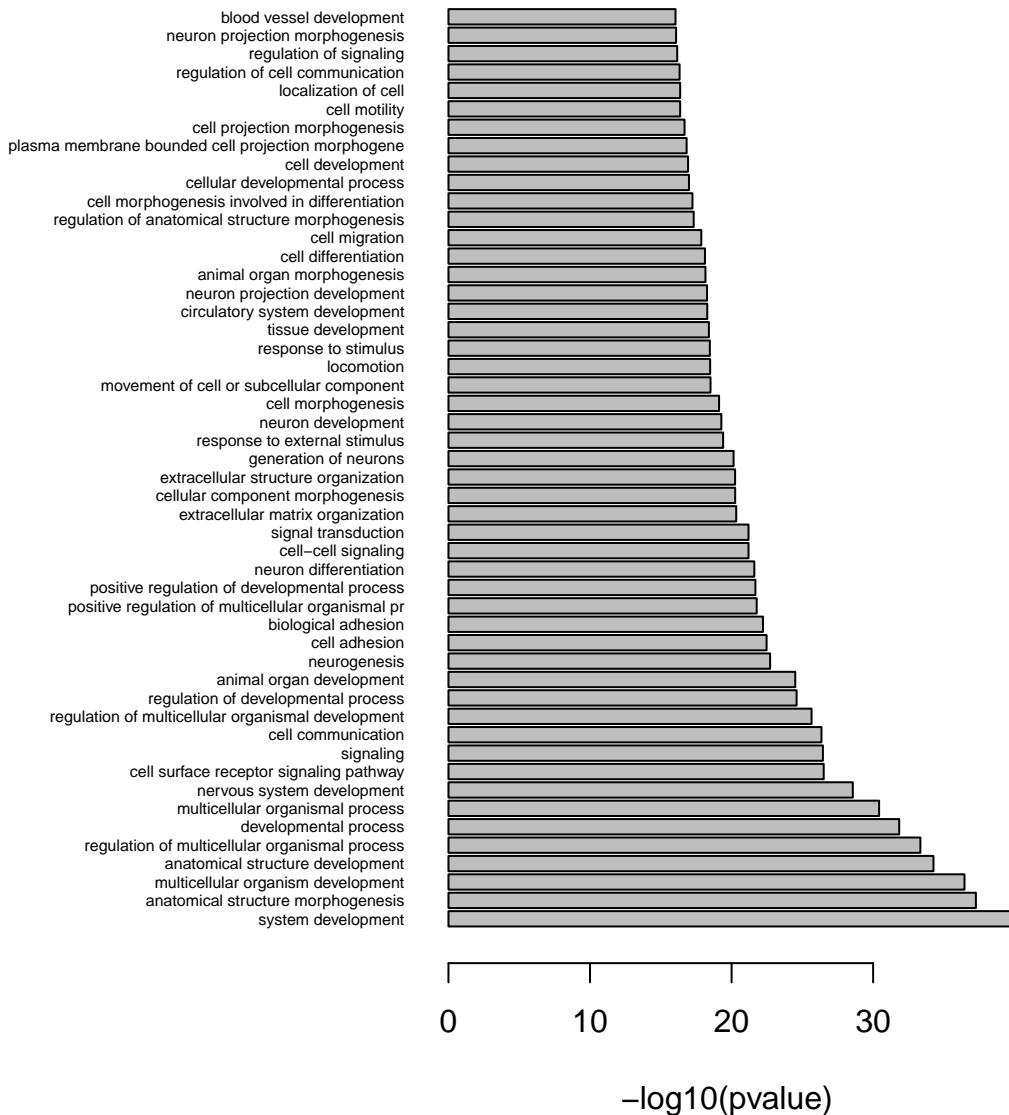

Supplement: Supplementary file 43 [file 14332325]

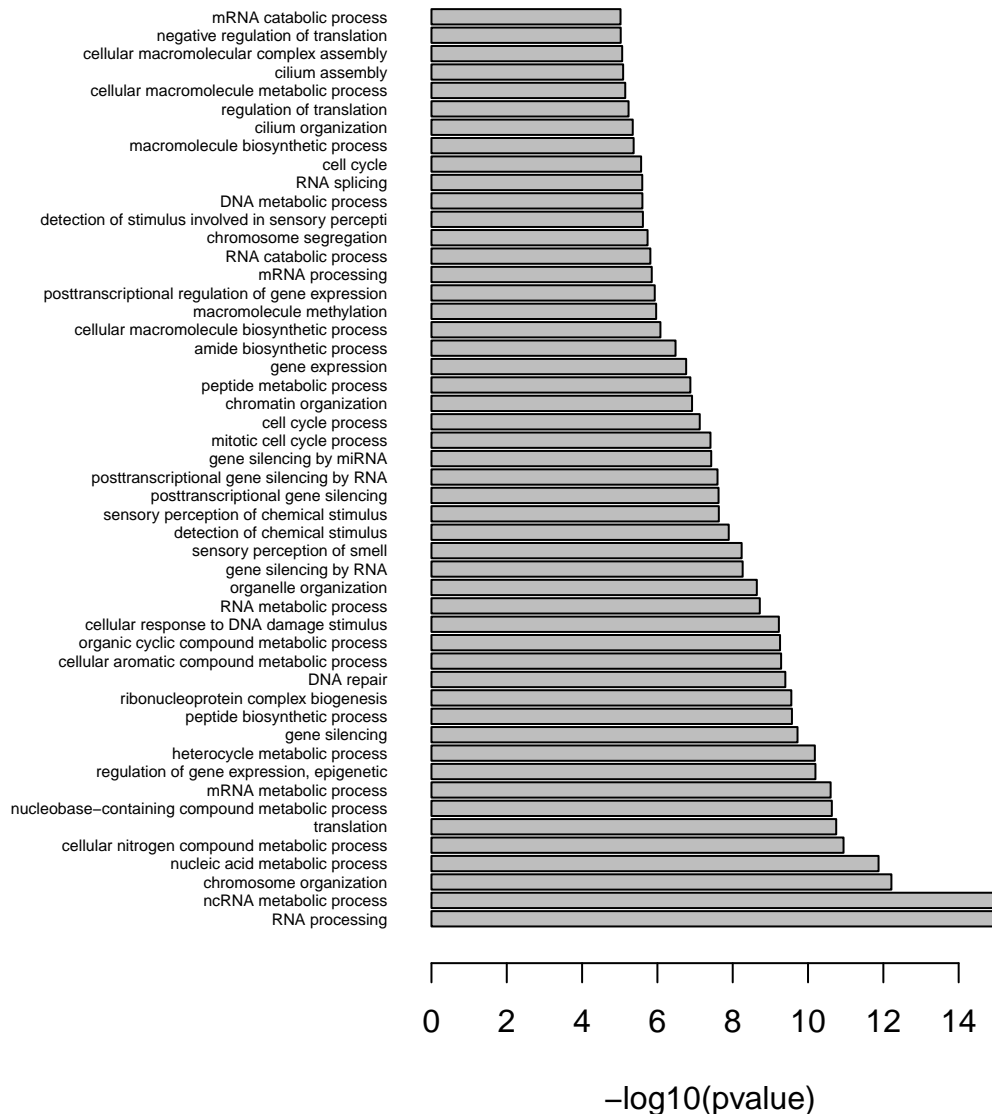

Supplement: Supplementary file 44 [file 14332325]

### GOstats\_BP\_Up\_pieChart

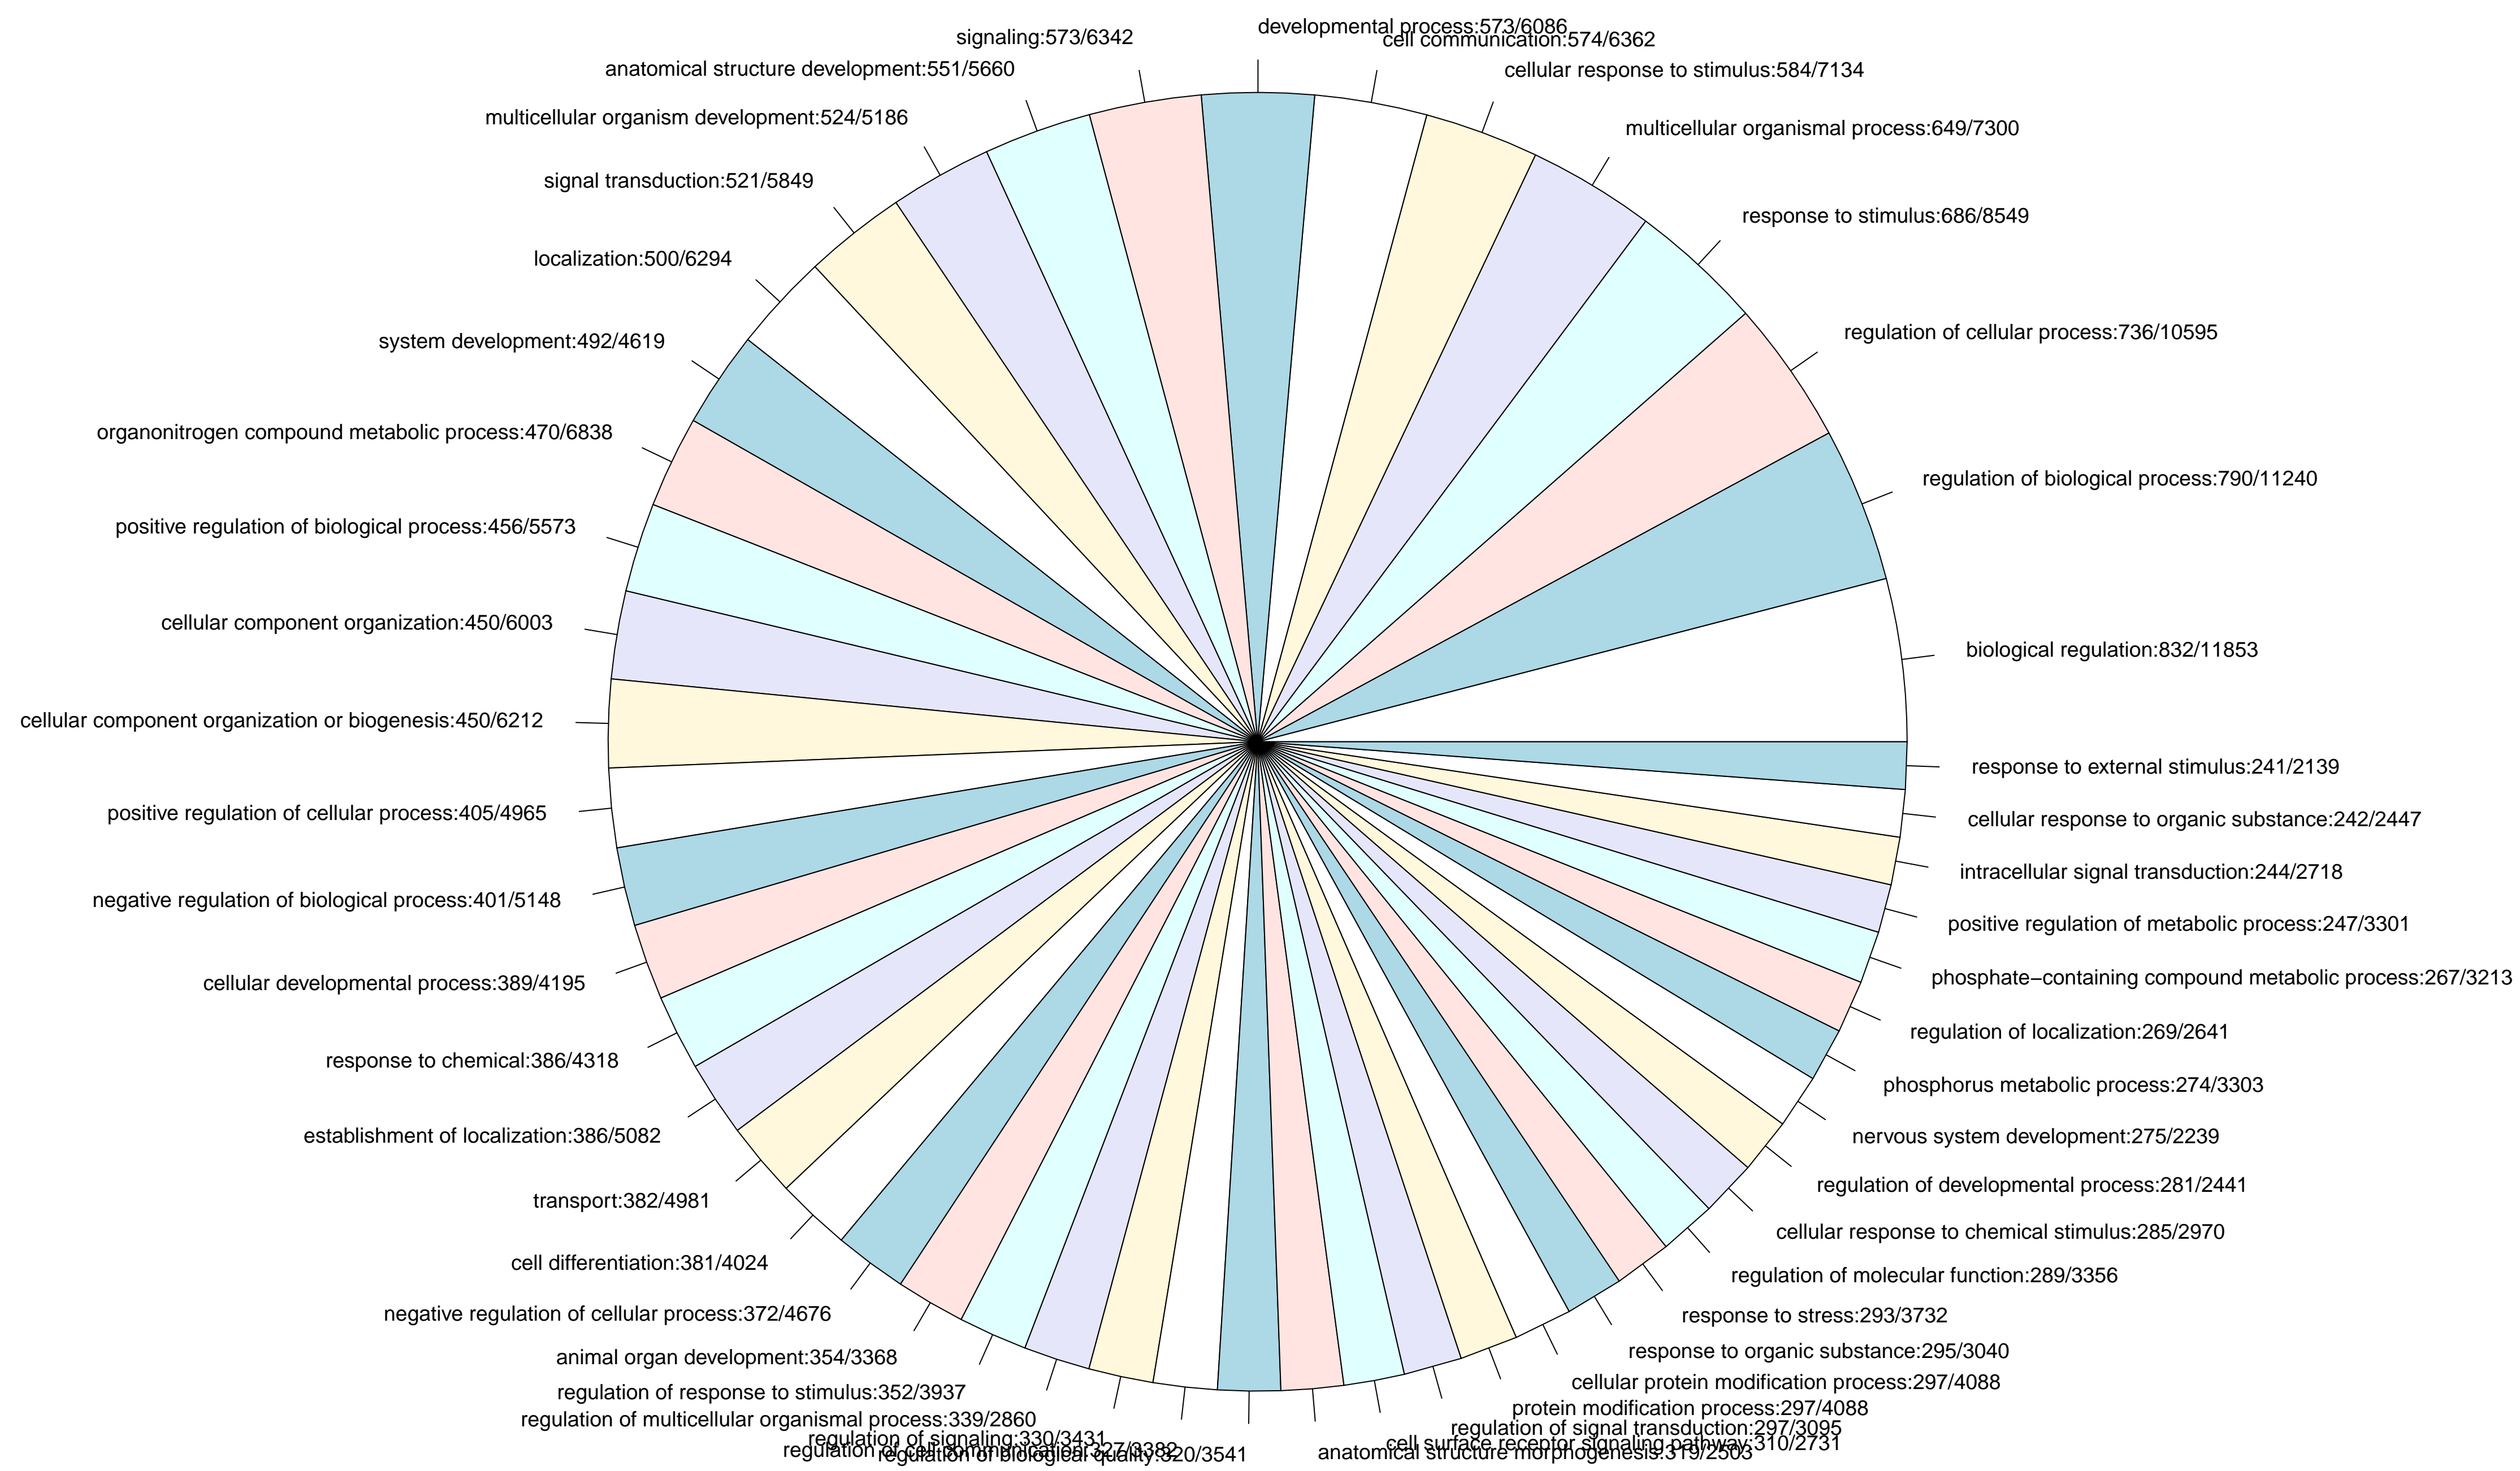

Supplement: Supplementary file 45 [file 14332325]

topGO\_MF\_elimfisher\_pieChart

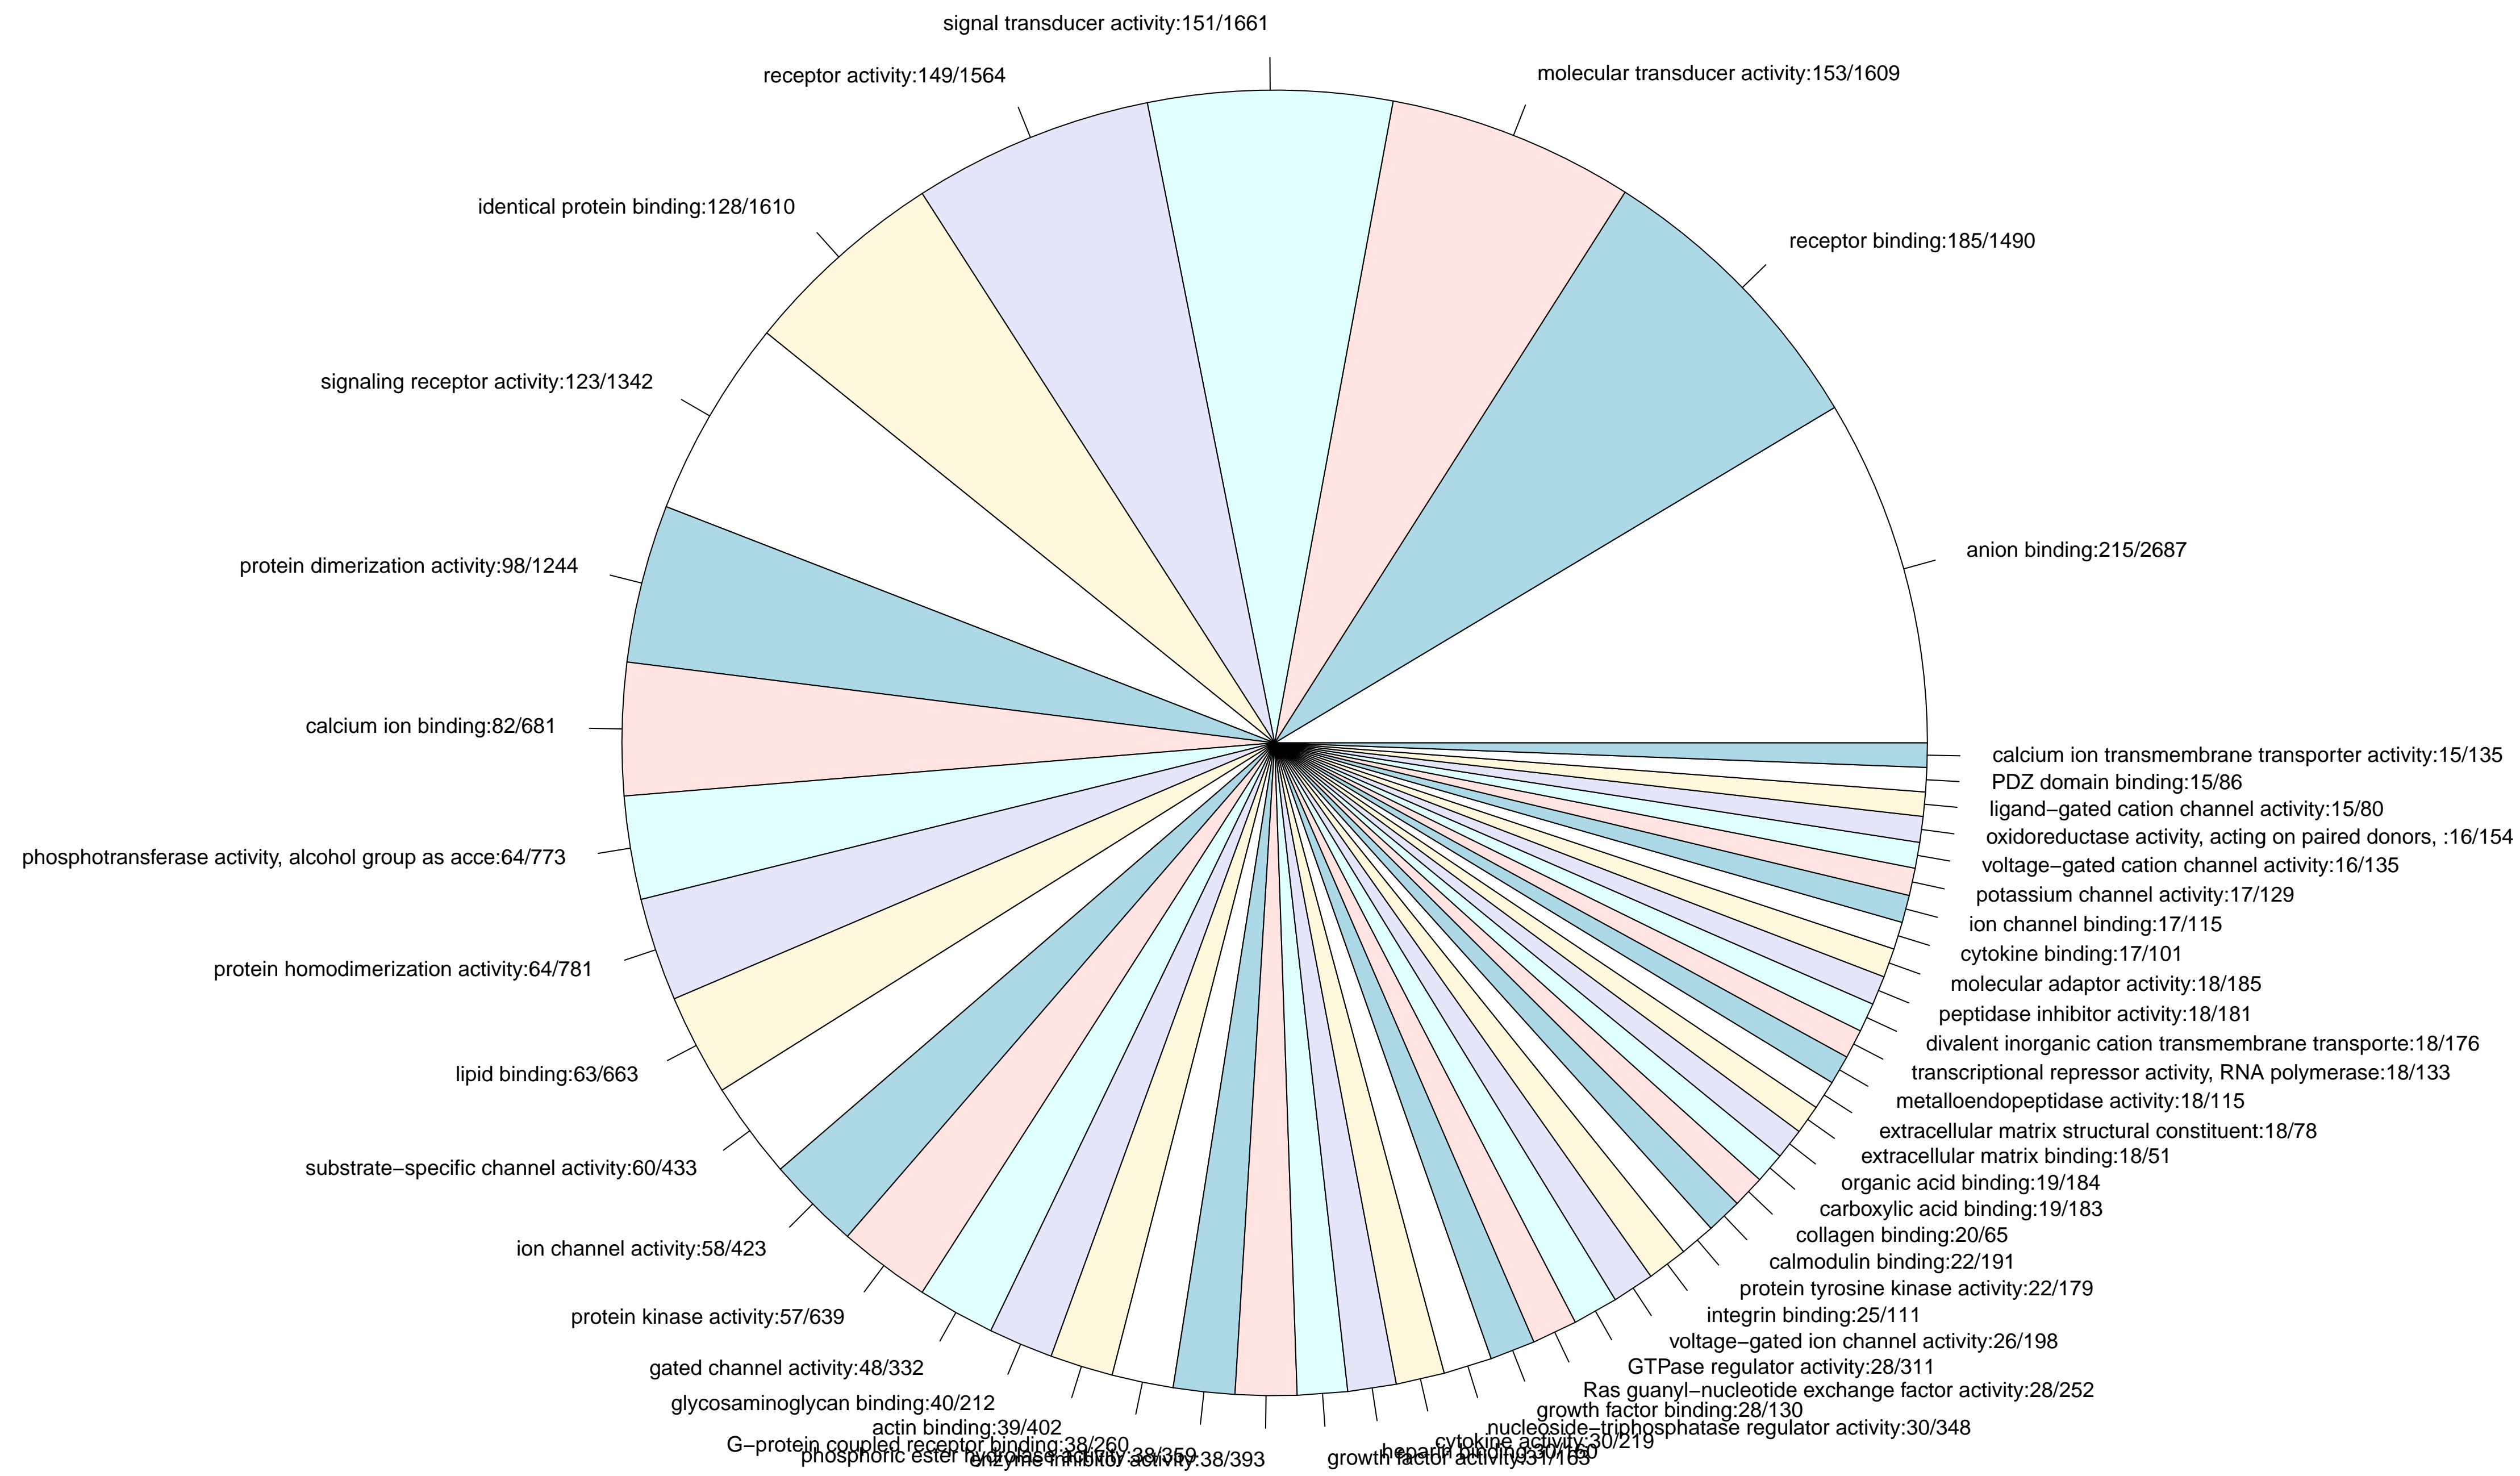

Supplement: Supplementary file 46 [file 14332325]
